# Supplementary material for: Genus-Wide Comparative Genomics Analysis of Neisseria to Identify New Genes Associated with Pathogenicity and Niche Adaptation of Neisseria Pathogens
Source: Int J Genomics. 2019 Jan 15;2019:6015730. doi: 10.1155/2019/6015730 (PMC6350579; doi:10.1155/2019/6015730)
Supplement: Supplementary 2 — Table S1: the ratio of homologous between genomes. [file 6015730.f2.xlsx]

## Sheet: heatmap_pairlist
Table S1 The ratio of homologous between genomes
##genome id1	genome id2	% of protein homology
N.gonorrhoeae_32867	N.zoodegmatis_NCTC12230	0.5338
N.gonorrhoeae_32867	N.weaveri_NCTC13585	0.583
N.gonorrhoeae_32867	N.mucosa_C102	0.6284
N.gonorrhoeae_32867	N.elongata_ATCC_29315	0.5678
N.gonorrhoeae_32867	N.lactamica_Y92-1009	0.701
N.gonorrhoeae_32867	N.lactamica_ATCC_23970	0.7005
N.gonorrhoeae_32867	N.lactamica_020-06	0.6958
N.gonorrhoeae_32867	N.meningitidis_Z2491	0.7304
N.gonorrhoeae_32867	N.meningitidis_WUE_2594	0.7403
N.gonorrhoeae_32867	N.meningitidis_WUE2121	0.7297
N.gonorrhoeae_32867	N.meningitidis_NZ-05_33	0.7309
N.gonorrhoeae_32867	N.meningitidis_NM3686	0.7357
N.gonorrhoeae_32867	N.meningitidis_NM3683	0.7317
N.gonorrhoeae_32867	N.meningitidis_NM3682	0.7325
N.gonorrhoeae_32867	N.meningitidis_MC58	0.7325
N.gonorrhoeae_32867	N.meningitidis_M7124	0.7319
N.gonorrhoeae_32867	N.meningitidis_M27559	0.7307
N.gonorrhoeae_32867	N.meningitidis_M25476	0.7279
N.gonorrhoeae_32867	N.meningitidis_M25474	0.7308
N.gonorrhoeae_32867	N.meningitidis_M25472	0.7298
N.gonorrhoeae_32867	N.meningitidis_M25462	0.7302
N.gonorrhoeae_32867	N.meningitidis_M25459	0.731
N.gonorrhoeae_32867	N.meningitidis_M25456	0.7291
N.gonorrhoeae_32867	N.meningitidis_M25438	0.7322
N.gonorrhoeae_32867	N.meningitidis_M25419	0.732
N.gonorrhoeae_32867	N.meningitidis_M25087	0.7293
N.gonorrhoeae_32867	N.meningitidis_M25074	0.7245
N.gonorrhoeae_32867	N.meningitidis_M25073	0.7278
N.gonorrhoeae_32867	N.meningitidis_M25070	0.7295
N.gonorrhoeae_32867	N.meningitidis_M24730	0.7321
N.gonorrhoeae_32867	N.meningitidis_M24705	0.738
N.gonorrhoeae_32867	N.meningitidis_M23413	0.7317
N.gonorrhoeae_32867	N.meningitidis_M22828	0.7371
N.gonorrhoeae_32867	N.meningitidis_M22822	0.7372
N.gonorrhoeae_32867	N.meningitidis_M22819	0.7384
N.gonorrhoeae_32867	N.meningitidis_M22811	0.7345
N.gonorrhoeae_32867	N.meningitidis_M22809	0.7363
N.gonorrhoeae_32867	N.meningitidis_M22804	0.7349
N.gonorrhoeae_32867	N.meningitidis_M22801	0.7295
N.gonorrhoeae_32867	N.meningitidis_M22797	0.7298
N.gonorrhoeae_32867	N.meningitidis_M22790	0.7279
N.gonorrhoeae_32867	N.meningitidis_M22783	0.7349
N.gonorrhoeae_32867	N.meningitidis_M22772	0.7316
N.gonorrhoeae_32867	N.meningitidis_M22769	0.7339
N.gonorrhoeae_32867	N.meningitidis_M22759	0.7356
N.gonorrhoeae_32867	N.meningitidis_M22748	0.7334
N.gonorrhoeae_32867	N.meningitidis_M22747	0.7295
N.gonorrhoeae_32867	N.meningitidis_M22745	0.7313
N.gonorrhoeae_32867	N.meningitidis_M22740	0.7308
N.gonorrhoeae_32867	N.meningitidis_M22722	0.7305
N.gonorrhoeae_32867	N.meningitidis_M22718	0.7312
N.gonorrhoeae_32867	N.meningitidis_M22191	0.7331
N.gonorrhoeae_32867	N.meningitidis_M22189	0.7306
N.gonorrhoeae_32867	N.meningitidis_M22160	0.7291
N.gonorrhoeae_32867	N.meningitidis_M12752	0.7295
N.gonorrhoeae_32867	N.meningitidis_M10208	0.7275
N.gonorrhoeae_32867	N.meningitidis_M09293	0.7291
N.gonorrhoeae_32867	N.meningitidis_M09261	0.7299
N.gonorrhoeae_32867	N.meningitidis_M08001	0.7304
N.gonorrhoeae_32867	N.meningitidis_M08000	0.7312
N.gonorrhoeae_32867	N.meningitidis_M07999	0.7304
N.gonorrhoeae_32867	N.meningitidis_M07165	0.7277
N.gonorrhoeae_32867	N.meningitidis_M07162	0.7291
N.gonorrhoeae_32867	N.meningitidis_M07161	0.7277
N.gonorrhoeae_32867	N.meningitidis_M07149	0.73
N.gonorrhoeae_32867	N.meningitidis_M0579	0.7343
N.gonorrhoeae_32867	N.meningitidis_M04-240196	0.7305
N.gonorrhoeae_32867	N.meningitidis_M01-240355	0.7312
N.gonorrhoeae_32867	N.meningitidis_M01-240149	0.7352
N.gonorrhoeae_32867	N.meningitidis_LNP21362	0.7293
N.gonorrhoeae_32867	N.meningitidis_L91543	0.7328
N.gonorrhoeae_32867	N.meningitidis_H44_76	0.7302
N.gonorrhoeae_32867	N.meningitidis_G2136	0.7343
N.gonorrhoeae_32867	N.meningitidis_FDAARGOS_215	0.7268
N.gonorrhoeae_32867	N.meningitidis_FDAARGOS_214	0.727
N.gonorrhoeae_32867	N.meningitidis_FDAARGOS_212	0.7412
N.gonorrhoeae_32867	N.meningitidis_FDAARGOS_211	0.7252
N.gonorrhoeae_32867	N.meningitidis_FDAARGOS_210	0.7289
N.gonorrhoeae_32867	N.meningitidis_FDAARGOS_209	0.726
N.gonorrhoeae_32867	N.meningitidis_FAM18	0.7399
N.gonorrhoeae_32867	N.meningitidis_DE8669	0.7305
N.gonorrhoeae_32867	N.meningitidis_DE8555	0.7311
N.gonorrhoeae_32867	N.meningitidis_DE10444	0.7399
N.gonorrhoeae_32867	N.meningitidis_COL-201504-11	0.7361
N.gonorrhoeae_32867	N.meningitidis_B6116_77	0.7341
N.gonorrhoeae_32867	N.meningitidis_alpha710	0.7313
N.gonorrhoeae_32867	N.meningitidis_alpha14	0.7304
N.gonorrhoeae_32867	N.meningitidis_8013	0.7246
N.gonorrhoeae_32867	N.meningitidis_510612	0.7311
N.gonorrhoeae_32867	N.meningitidis_38277	0.7273
N.gonorrhoeae_32867	N.meningitidis_331401	0.7328
N.gonorrhoeae_32867	N.meningitidis_053442	0.7402
N.gonorrhoeae_32867	N.gonorrhoeae_NCTC13800	0.9468
N.gonorrhoeae_32867	N.gonorrhoeae_NCTC13799	0.9278
N.gonorrhoeae_32867	N.gonorrhoeae_NCTC13798	0.9434
N.gonorrhoeae_32867	N.gonorrhoeae_NCCP11945	0.9466
N.gonorrhoeae_32867	N.gonorrhoeae_MS11	0.9367
N.gonorrhoeae_32867	N.gonorrhoeae_FDAARGOS_207	0.9282
N.gonorrhoeae_32867	N.gonorrhoeae_FDAARGOS_205	0.9276
N.gonorrhoeae_32867	N.gonorrhoeae_FDAARGOS_204	0.9239
N.gonorrhoeae_32867	N.gonorrhoeae_FA6140	0.9254
N.gonorrhoeae_32867	N.gonorrhoeae_FA19	0.935
N.gonorrhoeae_32867	N.gonorrhoeae_FA_1090	0.9195
N.gonorrhoeae_32867	N.gonorrhoeae_35_02	0.9307
N.gonorrhoeae_32867	N.gonorrhoeae_34769	0.9384
N.gonorrhoeae_32867	N.gonorrhoeae_34530	0.943
N.gonorrhoeae_32867	N.gonorrhoeae_32867	0.0353
N.gonorrhoeae_34530	N.zoodegmatis_NCTC12230	0.5337
N.gonorrhoeae_34530	N.weaveri_NCTC13585	0.5844
N.gonorrhoeae_34530	N.mucosa_C102	0.629
N.gonorrhoeae_34530	N.elongata_ATCC_29315	0.5677
N.gonorrhoeae_34530	N.lactamica_Y92-1009	0.7038
N.gonorrhoeae_34530	N.lactamica_ATCC_23970	0.7013
N.gonorrhoeae_34530	N.lactamica_020-06	0.6969
N.gonorrhoeae_34530	N.meningitidis_Z2491	0.7288
N.gonorrhoeae_34530	N.meningitidis_WUE_2594	0.7363
N.gonorrhoeae_34530	N.meningitidis_WUE2121	0.7279
N.gonorrhoeae_34530	N.meningitidis_NZ-05_33	0.7317
N.gonorrhoeae_34530	N.meningitidis_NM3686	0.733
N.gonorrhoeae_34530	N.meningitidis_NM3683	0.7315
N.gonorrhoeae_34530	N.meningitidis_NM3682	0.7328
N.gonorrhoeae_34530	N.meningitidis_MC58	0.7307
N.gonorrhoeae_34530	N.meningitidis_M7124	0.7299
N.gonorrhoeae_34530	N.meningitidis_M27559	0.7297
N.gonorrhoeae_34530	N.meningitidis_M25476	0.7282
N.gonorrhoeae_34530	N.meningitidis_M25474	0.7294
N.gonorrhoeae_34530	N.meningitidis_M25472	0.728
N.gonorrhoeae_34530	N.meningitidis_M25462	0.7288
N.gonorrhoeae_34530	N.meningitidis_M25459	0.7296
N.gonorrhoeae_34530	N.meningitidis_M25456	0.7276
N.gonorrhoeae_34530	N.meningitidis_M25438	0.7319
N.gonorrhoeae_34530	N.meningitidis_M25419	0.7305
N.gonorrhoeae_34530	N.meningitidis_M25087	0.7299
N.gonorrhoeae_34530	N.meningitidis_M25074	0.7244
N.gonorrhoeae_34530	N.meningitidis_M25073	0.7277
N.gonorrhoeae_34530	N.meningitidis_M25070	0.729
N.gonorrhoeae_34530	N.meningitidis_M24730	0.7312
N.gonorrhoeae_34530	N.meningitidis_M24705	0.7378
N.gonorrhoeae_34530	N.meningitidis_M23413	0.7312
N.gonorrhoeae_34530	N.meningitidis_M22828	0.7352
N.gonorrhoeae_34530	N.meningitidis_M22822	0.7361
N.gonorrhoeae_34530	N.meningitidis_M22819	0.7383
N.gonorrhoeae_34530	N.meningitidis_M22811	0.7355
N.gonorrhoeae_34530	N.meningitidis_M22809	0.7358
N.gonorrhoeae_34530	N.meningitidis_M22804	0.733
N.gonorrhoeae_34530	N.meningitidis_M22801	0.7297
N.gonorrhoeae_34530	N.meningitidis_M22797	0.7304
N.gonorrhoeae_34530	N.meningitidis_M22790	0.7261
N.gonorrhoeae_34530	N.meningitidis_M22783	0.7339
N.gonorrhoeae_34530	N.meningitidis_M22772	0.7314
N.gonorrhoeae_34530	N.meningitidis_M22769	0.7345
N.gonorrhoeae_34530	N.meningitidis_M22759	0.7362
N.gonorrhoeae_34530	N.meningitidis_M22748	0.732
N.gonorrhoeae_34530	N.meningitidis_M22747	0.7294
N.gonorrhoeae_34530	N.meningitidis_M22745	0.7306
N.gonorrhoeae_34530	N.meningitidis_M22740	0.7298
N.gonorrhoeae_34530	N.meningitidis_M22722	0.7308
N.gonorrhoeae_34530	N.meningitidis_M22718	0.7301
N.gonorrhoeae_34530	N.meningitidis_M22191	0.7313
N.gonorrhoeae_34530	N.meningitidis_M22189	0.7308
N.gonorrhoeae_34530	N.meningitidis_M22160	0.729
N.gonorrhoeae_34530	N.meningitidis_M12752	0.7294
N.gonorrhoeae_34530	N.meningitidis_M10208	0.7255
N.gonorrhoeae_34530	N.meningitidis_M09293	0.728
N.gonorrhoeae_34530	N.meningitidis_M09261	0.7284
N.gonorrhoeae_34530	N.meningitidis_M08001	0.7293
N.gonorrhoeae_34530	N.meningitidis_M08000	0.7301
N.gonorrhoeae_34530	N.meningitidis_M07999	0.7298
N.gonorrhoeae_34530	N.meningitidis_M07165	0.7258
N.gonorrhoeae_34530	N.meningitidis_M07162	0.7284
N.gonorrhoeae_34530	N.meningitidis_M07161	0.7263
N.gonorrhoeae_34530	N.meningitidis_M07149	0.729
N.gonorrhoeae_34530	N.meningitidis_M0579	0.7363
N.gonorrhoeae_34530	N.meningitidis_M04-240196	0.7324
N.gonorrhoeae_34530	N.meningitidis_M01-240355	0.7323
N.gonorrhoeae_34530	N.meningitidis_M01-240149	0.7354
N.gonorrhoeae_34530	N.meningitidis_LNP21362	0.7303
N.gonorrhoeae_34530	N.meningitidis_L91543	0.7319
N.gonorrhoeae_34530	N.meningitidis_H44_76	0.7304
N.gonorrhoeae_34530	N.meningitidis_G2136	0.7345
N.gonorrhoeae_34530	N.meningitidis_FDAARGOS_215	0.7278
N.gonorrhoeae_34530	N.meningitidis_FDAARGOS_214	0.729
N.gonorrhoeae_34530	N.meningitidis_FDAARGOS_212	0.7406
N.gonorrhoeae_34530	N.meningitidis_FDAARGOS_211	0.7266
N.gonorrhoeae_34530	N.meningitidis_FDAARGOS_210	0.7283
N.gonorrhoeae_34530	N.meningitidis_FDAARGOS_209	0.7249
N.gonorrhoeae_34530	N.meningitidis_FAM18	0.738
N.gonorrhoeae_34530	N.meningitidis_DE8669	0.7298
N.gonorrhoeae_34530	N.meningitidis_DE8555	0.7297
N.gonorrhoeae_34530	N.meningitidis_DE10444	0.7401
N.gonorrhoeae_34530	N.meningitidis_COL-201504-11	0.7363
N.gonorrhoeae_34530	N.meningitidis_B6116_77	0.7326
N.gonorrhoeae_34530	N.meningitidis_alpha710	0.734
N.gonorrhoeae_34530	N.meningitidis_alpha14	0.7307
N.gonorrhoeae_34530	N.meningitidis_8013	0.7287
N.gonorrhoeae_34530	N.meningitidis_510612	0.731
N.gonorrhoeae_34530	N.meningitidis_38277	0.7306
N.gonorrhoeae_34530	N.meningitidis_331401	0.7321
N.gonorrhoeae_34530	N.meningitidis_053442	0.7406
N.gonorrhoeae_34530	N.gonorrhoeae_NCTC13800	0.9829
N.gonorrhoeae_34530	N.gonorrhoeae_NCTC13799	0.935
N.gonorrhoeae_34530	N.gonorrhoeae_NCTC13798	0.9775
N.gonorrhoeae_34530	N.gonorrhoeae_NCCP11945	0.9581
N.gonorrhoeae_34530	N.gonorrhoeae_MS11	0.93
N.gonorrhoeae_34530	N.gonorrhoeae_FDAARGOS_207	0.9248
N.gonorrhoeae_34530	N.gonorrhoeae_FDAARGOS_205	0.9283
N.gonorrhoeae_34530	N.gonorrhoeae_FDAARGOS_204	0.9243
N.gonorrhoeae_34530	N.gonorrhoeae_FA6140	0.9258
N.gonorrhoeae_34530	N.gonorrhoeae_FA19	0.9284
N.gonorrhoeae_34530	N.gonorrhoeae_FA_1090	0.9207
N.gonorrhoeae_34530	N.gonorrhoeae_35_02	0.934
N.gonorrhoeae_34530	N.gonorrhoeae_34769	0.9275
N.gonorrhoeae_34530	N.gonorrhoeae_34530	0.0449
N.gonorrhoeae_34769	N.zoodegmatis_NCTC12230	0.5351
N.gonorrhoeae_34769	N.weaveri_NCTC13585	0.5842
N.gonorrhoeae_34769	N.mucosa_C102	0.6312
N.gonorrhoeae_34769	N.elongata_ATCC_29315	0.5688
N.gonorrhoeae_34769	N.lactamica_Y92-1009	0.7025
N.gonorrhoeae_34769	N.lactamica_ATCC_23970	0.7017
N.gonorrhoeae_34769	N.lactamica_020-06	0.6982
N.gonorrhoeae_34769	N.meningitidis_Z2491	0.7349
N.gonorrhoeae_34769	N.meningitidis_WUE_2594	0.7381
N.gonorrhoeae_34769	N.meningitidis_WUE2121	0.7288
N.gonorrhoeae_34769	N.meningitidis_NZ-05_33	0.7318
N.gonorrhoeae_34769	N.meningitidis_NM3686	0.7335
N.gonorrhoeae_34769	N.meningitidis_NM3683	0.7294
N.gonorrhoeae_34769	N.meningitidis_NM3682	0.7299
N.gonorrhoeae_34769	N.meningitidis_MC58	0.7307
N.gonorrhoeae_34769	N.meningitidis_M7124	0.7313
N.gonorrhoeae_34769	N.meningitidis_M27559	0.7285
N.gonorrhoeae_34769	N.meningitidis_M25476	0.7283
N.gonorrhoeae_34769	N.meningitidis_M25474	0.7303
N.gonorrhoeae_34769	N.meningitidis_M25472	0.7289
N.gonorrhoeae_34769	N.meningitidis_M25462	0.7301
N.gonorrhoeae_34769	N.meningitidis_M25459	0.7289
N.gonorrhoeae_34769	N.meningitidis_M25456	0.7294
N.gonorrhoeae_34769	N.meningitidis_M25438	0.7316
N.gonorrhoeae_34769	N.meningitidis_M25419	0.7297
N.gonorrhoeae_34769	N.meningitidis_M25087	0.7296
N.gonorrhoeae_34769	N.meningitidis_M25074	0.7249
N.gonorrhoeae_34769	N.meningitidis_M25073	0.7282
N.gonorrhoeae_34769	N.meningitidis_M25070	0.7308
N.gonorrhoeae_34769	N.meningitidis_M24730	0.7321
N.gonorrhoeae_34769	N.meningitidis_M24705	0.7353
N.gonorrhoeae_34769	N.meningitidis_M23413	0.7292
N.gonorrhoeae_34769	N.meningitidis_M22828	0.7357
N.gonorrhoeae_34769	N.meningitidis_M22822	0.7336
N.gonorrhoeae_34769	N.meningitidis_M22819	0.7384
N.gonorrhoeae_34769	N.meningitidis_M22811	0.7365
N.gonorrhoeae_34769	N.meningitidis_M22809	0.735
N.gonorrhoeae_34769	N.meningitidis_M22804	0.7331
N.gonorrhoeae_34769	N.meningitidis_M22801	0.7294
N.gonorrhoeae_34769	N.meningitidis_M22797	0.7292
N.gonorrhoeae_34769	N.meningitidis_M22790	0.7288
N.gonorrhoeae_34769	N.meningitidis_M22783	0.7318
N.gonorrhoeae_34769	N.meningitidis_M22772	0.7315
N.gonorrhoeae_34769	N.meningitidis_M22769	0.7346
N.gonorrhoeae_34769	N.meningitidis_M22759	0.7367
N.gonorrhoeae_34769	N.meningitidis_M22748	0.7317
N.gonorrhoeae_34769	N.meningitidis_M22747	0.7291
N.gonorrhoeae_34769	N.meningitidis_M22745	0.7307
N.gonorrhoeae_34769	N.meningitidis_M22740	0.7308
N.gonorrhoeae_34769	N.meningitidis_M22722	0.7296
N.gonorrhoeae_34769	N.meningitidis_M22718	0.7315
N.gonorrhoeae_34769	N.meningitidis_M22191	0.7327
N.gonorrhoeae_34769	N.meningitidis_M22189	0.7304
N.gonorrhoeae_34769	N.meningitidis_M22160	0.7308
N.gonorrhoeae_34769	N.meningitidis_M12752	0.7299
N.gonorrhoeae_34769	N.meningitidis_M10208	0.7269
N.gonorrhoeae_34769	N.meningitidis_M09293	0.7285
N.gonorrhoeae_34769	N.meningitidis_M09261	0.7302
N.gonorrhoeae_34769	N.meningitidis_M08001	0.7302
N.gonorrhoeae_34769	N.meningitidis_M08000	0.7319
N.gonorrhoeae_34769	N.meningitidis_M07999	0.7299
N.gonorrhoeae_34769	N.meningitidis_M07165	0.7263
N.gonorrhoeae_34769	N.meningitidis_M07162	0.7281
N.gonorrhoeae_34769	N.meningitidis_M07161	0.7276
N.gonorrhoeae_34769	N.meningitidis_M07149	0.7295
N.gonorrhoeae_34769	N.meningitidis_M0579	0.7329
N.gonorrhoeae_34769	N.meningitidis_M04-240196	0.7295
N.gonorrhoeae_34769	N.meningitidis_M01-240355	0.7316
N.gonorrhoeae_34769	N.meningitidis_M01-240149	0.7351
N.gonorrhoeae_34769	N.meningitidis_LNP21362	0.73
N.gonorrhoeae_34769	N.meningitidis_L91543	0.7319
N.gonorrhoeae_34769	N.meningitidis_H44_76	0.7296
N.gonorrhoeae_34769	N.meningitidis_G2136	0.7354
N.gonorrhoeae_34769	N.meningitidis_FDAARGOS_215	0.7292
N.gonorrhoeae_34769	N.meningitidis_FDAARGOS_214	0.7295
N.gonorrhoeae_34769	N.meningitidis_FDAARGOS_212	0.7411
N.gonorrhoeae_34769	N.meningitidis_FDAARGOS_211	0.7275
N.gonorrhoeae_34769	N.meningitidis_FDAARGOS_210	0.7275
N.gonorrhoeae_34769	N.meningitidis_FDAARGOS_209	0.7271
N.gonorrhoeae_34769	N.meningitidis_FAM18	0.7394
N.gonorrhoeae_34769	N.meningitidis_DE8669	0.7308
N.gonorrhoeae_34769	N.meningitidis_DE8555	0.7315
N.gonorrhoeae_34769	N.meningitidis_DE10444	0.7433
N.gonorrhoeae_34769	N.meningitidis_COL-201504-11	0.736
N.gonorrhoeae_34769	N.meningitidis_B6116_77	0.7335
N.gonorrhoeae_34769	N.meningitidis_alpha710	0.7307
N.gonorrhoeae_34769	N.meningitidis_alpha14	0.7329
N.gonorrhoeae_34769	N.meningitidis_8013	0.728
N.gonorrhoeae_34769	N.meningitidis_510612	0.7319
N.gonorrhoeae_34769	N.meningitidis_38277	0.7311
N.gonorrhoeae_34769	N.meningitidis_331401	0.7339
N.gonorrhoeae_34769	N.meningitidis_053442	0.7385
N.gonorrhoeae_34769	N.gonorrhoeae_NCTC13800	0.9296
N.gonorrhoeae_34769	N.gonorrhoeae_NCTC13799	0.9197
N.gonorrhoeae_34769	N.gonorrhoeae_NCTC13798	0.9266
N.gonorrhoeae_34769	N.gonorrhoeae_NCCP11945	0.9323
N.gonorrhoeae_34769	N.gonorrhoeae_MS11	0.9279
N.gonorrhoeae_34769	N.gonorrhoeae_FDAARGOS_207	0.9247
N.gonorrhoeae_34769	N.gonorrhoeae_FDAARGOS_205	0.9189
N.gonorrhoeae_34769	N.gonorrhoeae_FDAARGOS_204	0.9275
N.gonorrhoeae_34769	N.gonorrhoeae_FA6140	0.9223
N.gonorrhoeae_34769	N.gonorrhoeae_FA19	0.9349
N.gonorrhoeae_34769	N.gonorrhoeae_FA_1090	0.9146
N.gonorrhoeae_34769	N.gonorrhoeae_35_02	0.9238
N.gonorrhoeae_34769	N.gonorrhoeae_34769	0.0384
N.gonorrhoeae_35_02	N.zoodegmatis_NCTC12230	0.5423
N.gonorrhoeae_35_02	N.weaveri_NCTC13585	0.5938
N.gonorrhoeae_35_02	N.mucosa_C102	0.6398
N.gonorrhoeae_35_02	N.elongata_ATCC_29315	0.5777
N.gonorrhoeae_35_02	N.lactamica_Y92-1009	0.7098
N.gonorrhoeae_35_02	N.lactamica_ATCC_23970	0.7073
N.gonorrhoeae_35_02	N.lactamica_020-06	0.7053
N.gonorrhoeae_35_02	N.meningitidis_Z2491	0.7414
N.gonorrhoeae_35_02	N.meningitidis_WUE_2594	0.7483
N.gonorrhoeae_35_02	N.meningitidis_WUE2121	0.7385
N.gonorrhoeae_35_02	N.meningitidis_NZ-05_33	0.742
N.gonorrhoeae_35_02	N.meningitidis_NM3686	0.7455
N.gonorrhoeae_35_02	N.meningitidis_NM3683	0.7409
N.gonorrhoeae_35_02	N.meningitidis_NM3682	0.7405
N.gonorrhoeae_35_02	N.meningitidis_MC58	0.7392
N.gonorrhoeae_35_02	N.meningitidis_M7124	0.7415
N.gonorrhoeae_35_02	N.meningitidis_M27559	0.7404
N.gonorrhoeae_35_02	N.meningitidis_M25476	0.7385
N.gonorrhoeae_35_02	N.meningitidis_M25474	0.7409
N.gonorrhoeae_35_02	N.meningitidis_M25472	0.74
N.gonorrhoeae_35_02	N.meningitidis_M25462	0.7399
N.gonorrhoeae_35_02	N.meningitidis_M25459	0.7407
N.gonorrhoeae_35_02	N.meningitidis_M25456	0.74
N.gonorrhoeae_35_02	N.meningitidis_M25438	0.7435
N.gonorrhoeae_35_02	N.meningitidis_M25419	0.7412
N.gonorrhoeae_35_02	N.meningitidis_M25087	0.741
N.gonorrhoeae_35_02	N.meningitidis_M25074	0.7349
N.gonorrhoeae_35_02	N.meningitidis_M25073	0.7387
N.gonorrhoeae_35_02	N.meningitidis_M25070	0.7401
N.gonorrhoeae_35_02	N.meningitidis_M24730	0.7428
N.gonorrhoeae_35_02	N.meningitidis_M24705	0.7462
N.gonorrhoeae_35_02	N.meningitidis_M23413	0.741
N.gonorrhoeae_35_02	N.meningitidis_M22828	0.7453
N.gonorrhoeae_35_02	N.meningitidis_M22822	0.7431
N.gonorrhoeae_35_02	N.meningitidis_M22819	0.7476
N.gonorrhoeae_35_02	N.meningitidis_M22811	0.7456
N.gonorrhoeae_35_02	N.meningitidis_M22809	0.7441
N.gonorrhoeae_35_02	N.meningitidis_M22804	0.7422
N.gonorrhoeae_35_02	N.meningitidis_M22801	0.7395
N.gonorrhoeae_35_02	N.meningitidis_M22797	0.7398
N.gonorrhoeae_35_02	N.meningitidis_M22790	0.7377
N.gonorrhoeae_35_02	N.meningitidis_M22783	0.7431
N.gonorrhoeae_35_02	N.meningitidis_M22772	0.7425
N.gonorrhoeae_35_02	N.meningitidis_M22769	0.7453
N.gonorrhoeae_35_02	N.meningitidis_M22759	0.7466
N.gonorrhoeae_35_02	N.meningitidis_M22748	0.7428
N.gonorrhoeae_35_02	N.meningitidis_M22747	0.7397
N.gonorrhoeae_35_02	N.meningitidis_M22745	0.7409
N.gonorrhoeae_35_02	N.meningitidis_M22740	0.7409
N.gonorrhoeae_35_02	N.meningitidis_M22722	0.7406
N.gonorrhoeae_35_02	N.meningitidis_M22718	0.7417
N.gonorrhoeae_35_02	N.meningitidis_M22191	0.7416
N.gonorrhoeae_35_02	N.meningitidis_M22189	0.7402
N.gonorrhoeae_35_02	N.meningitidis_M22160	0.7392
N.gonorrhoeae_35_02	N.meningitidis_M12752	0.7405
N.gonorrhoeae_35_02	N.meningitidis_M10208	0.7365
N.gonorrhoeae_35_02	N.meningitidis_M09293	0.7391
N.gonorrhoeae_35_02	N.meningitidis_M09261	0.7391
N.gonorrhoeae_35_02	N.meningitidis_M08001	0.7404
N.gonorrhoeae_35_02	N.meningitidis_M08000	0.7425
N.gonorrhoeae_35_02	N.meningitidis_M07999	0.7405
N.gonorrhoeae_35_02	N.meningitidis_M07165	0.7385
N.gonorrhoeae_35_02	N.meningitidis_M07162	0.7395
N.gonorrhoeae_35_02	N.meningitidis_M07161	0.7377
N.gonorrhoeae_35_02	N.meningitidis_M07149	0.7401
N.gonorrhoeae_35_02	N.meningitidis_M0579	0.7459
N.gonorrhoeae_35_02	N.meningitidis_M04-240196	0.7423
N.gonorrhoeae_35_02	N.meningitidis_M01-240355	0.7435
N.gonorrhoeae_35_02	N.meningitidis_M01-240149	0.7454
N.gonorrhoeae_35_02	N.meningitidis_LNP21362	0.7417
N.gonorrhoeae_35_02	N.meningitidis_L91543	0.7413
N.gonorrhoeae_35_02	N.meningitidis_H44_76	0.7381
N.gonorrhoeae_35_02	N.meningitidis_G2136	0.7431
N.gonorrhoeae_35_02	N.meningitidis_FDAARGOS_215	0.7358
N.gonorrhoeae_35_02	N.meningitidis_FDAARGOS_214	0.723
N.gonorrhoeae_35_02	N.meningitidis_FDAARGOS_212	0.7329
N.gonorrhoeae_35_02	N.meningitidis_FDAARGOS_211	0.7342
N.gonorrhoeae_35_02	N.meningitidis_FDAARGOS_210	0.7347
N.gonorrhoeae_35_02	N.meningitidis_FDAARGOS_209	0.7355
N.gonorrhoeae_35_02	N.meningitidis_FAM18	0.7481
N.gonorrhoeae_35_02	N.meningitidis_DE8669	0.7419
N.gonorrhoeae_35_02	N.meningitidis_DE8555	0.7399
N.gonorrhoeae_35_02	N.meningitidis_DE10444	0.7518
N.gonorrhoeae_35_02	N.meningitidis_COL-201504-11	0.7463
N.gonorrhoeae_35_02	N.meningitidis_B6116_77	0.7398
N.gonorrhoeae_35_02	N.meningitidis_alpha710	0.7448
N.gonorrhoeae_35_02	N.meningitidis_alpha14	0.7447
N.gonorrhoeae_35_02	N.meningitidis_8013	0.7355
N.gonorrhoeae_35_02	N.meningitidis_510612	0.7404
N.gonorrhoeae_35_02	N.meningitidis_38277	0.7374
N.gonorrhoeae_35_02	N.meningitidis_331401	0.7429
N.gonorrhoeae_35_02	N.meningitidis_053442	0.7508
N.gonorrhoeae_35_02	N.gonorrhoeae_NCTC13800	0.9366
N.gonorrhoeae_35_02	N.gonorrhoeae_NCTC13799	0.9459
N.gonorrhoeae_35_02	N.gonorrhoeae_NCTC13798	0.9344
N.gonorrhoeae_35_02	N.gonorrhoeae_NCCP11945	0.9339
N.gonorrhoeae_35_02	N.gonorrhoeae_MS11	0.916
N.gonorrhoeae_35_02	N.gonorrhoeae_FDAARGOS_207	0.9142
N.gonorrhoeae_35_02	N.gonorrhoeae_FDAARGOS_205	0.9169
N.gonorrhoeae_35_02	N.gonorrhoeae_FDAARGOS_204	0.9125
N.gonorrhoeae_35_02	N.gonorrhoeae_FA6140	0.9306
N.gonorrhoeae_35_02	N.gonorrhoeae_FA19	0.9188
N.gonorrhoeae_35_02	N.gonorrhoeae_FA_1090	0.931
N.gonorrhoeae_35_02	N.gonorrhoeae_35_02	0.0382
N.gonorrhoeae_FA_1090	N.zoodegmatis_NCTC12230	0.5412
N.gonorrhoeae_FA_1090	N.weaveri_NCTC13585	0.593
N.gonorrhoeae_FA_1090	N.mucosa_C102	0.6405
N.gonorrhoeae_FA_1090	N.elongata_ATCC_29315	0.5771
N.gonorrhoeae_FA_1090	N.lactamica_Y92-1009	0.7111
N.gonorrhoeae_FA_1090	N.lactamica_ATCC_23970	0.7097
N.gonorrhoeae_FA_1090	N.lactamica_020-06	0.7047
N.gonorrhoeae_FA_1090	N.meningitidis_Z2491	0.7406
N.gonorrhoeae_FA_1090	N.meningitidis_WUE_2594	0.7471
N.gonorrhoeae_FA_1090	N.meningitidis_WUE2121	0.7385
N.gonorrhoeae_FA_1090	N.meningitidis_NZ-05_33	0.7407
N.gonorrhoeae_FA_1090	N.meningitidis_NM3686	0.7433
N.gonorrhoeae_FA_1090	N.meningitidis_NM3683	0.7406
N.gonorrhoeae_FA_1090	N.meningitidis_NM3682	0.7413
N.gonorrhoeae_FA_1090	N.meningitidis_MC58	0.7388
N.gonorrhoeae_FA_1090	N.meningitidis_M7124	0.7403
N.gonorrhoeae_FA_1090	N.meningitidis_M27559	0.7386
N.gonorrhoeae_FA_1090	N.meningitidis_M25476	0.7371
N.gonorrhoeae_FA_1090	N.meningitidis_M25474	0.7391
N.gonorrhoeae_FA_1090	N.meningitidis_M25472	0.7365
N.gonorrhoeae_FA_1090	N.meningitidis_M25462	0.7385
N.gonorrhoeae_FA_1090	N.meningitidis_M25459	0.7381
N.gonorrhoeae_FA_1090	N.meningitidis_M25456	0.7374
N.gonorrhoeae_FA_1090	N.meningitidis_M25438	0.7401
N.gonorrhoeae_FA_1090	N.meningitidis_M25419	0.7396
N.gonorrhoeae_FA_1090	N.meningitidis_M25087	0.7372
N.gonorrhoeae_FA_1090	N.meningitidis_M25074	0.7344
N.gonorrhoeae_FA_1090	N.meningitidis_M25073	0.7374
N.gonorrhoeae_FA_1090	N.meningitidis_M25070	0.7374
N.gonorrhoeae_FA_1090	N.meningitidis_M24730	0.741
N.gonorrhoeae_FA_1090	N.meningitidis_M24705	0.7449
N.gonorrhoeae_FA_1090	N.meningitidis_M23413	0.7397
N.gonorrhoeae_FA_1090	N.meningitidis_M22828	0.7418
N.gonorrhoeae_FA_1090	N.meningitidis_M22822	0.7423
N.gonorrhoeae_FA_1090	N.meningitidis_M22819	0.7454
N.gonorrhoeae_FA_1090	N.meningitidis_M22811	0.7431
N.gonorrhoeae_FA_1090	N.meningitidis_M22809	0.7427
N.gonorrhoeae_FA_1090	N.meningitidis_M22804	0.7409
N.gonorrhoeae_FA_1090	N.meningitidis_M22801	0.7383
N.gonorrhoeae_FA_1090	N.meningitidis_M22797	0.7381
N.gonorrhoeae_FA_1090	N.meningitidis_M22790	0.7337
N.gonorrhoeae_FA_1090	N.meningitidis_M22783	0.7409
N.gonorrhoeae_FA_1090	N.meningitidis_M22772	0.7418
N.gonorrhoeae_FA_1090	N.meningitidis_M22769	0.7437
N.gonorrhoeae_FA_1090	N.meningitidis_M22759	0.745
N.gonorrhoeae_FA_1090	N.meningitidis_M22748	0.7406
N.gonorrhoeae_FA_1090	N.meningitidis_M22747	0.7383
N.gonorrhoeae_FA_1090	N.meningitidis_M22745	0.7406
N.gonorrhoeae_FA_1090	N.meningitidis_M22740	0.7396
N.gonorrhoeae_FA_1090	N.meningitidis_M22722	0.7397
N.gonorrhoeae_FA_1090	N.meningitidis_M22718	0.7392
N.gonorrhoeae_FA_1090	N.meningitidis_M22191	0.7425
N.gonorrhoeae_FA_1090	N.meningitidis_M22189	0.7403
N.gonorrhoeae_FA_1090	N.meningitidis_M22160	0.7383
N.gonorrhoeae_FA_1090	N.meningitidis_M12752	0.7387
N.gonorrhoeae_FA_1090	N.meningitidis_M10208	0.7349
N.gonorrhoeae_FA_1090	N.meningitidis_M09293	0.7383
N.gonorrhoeae_FA_1090	N.meningitidis_M09261	0.7391
N.gonorrhoeae_FA_1090	N.meningitidis_M08001	0.7392
N.gonorrhoeae_FA_1090	N.meningitidis_M08000	0.74
N.gonorrhoeae_FA_1090	N.meningitidis_M07999	0.74
N.gonorrhoeae_FA_1090	N.meningitidis_M07165	0.736
N.gonorrhoeae_FA_1090	N.meningitidis_M07162	0.737
N.gonorrhoeae_FA_1090	N.meningitidis_M07161	0.7373
N.gonorrhoeae_FA_1090	N.meningitidis_M07149	0.7383
N.gonorrhoeae_FA_1090	N.meningitidis_M0579	0.7411
N.gonorrhoeae_FA_1090	N.meningitidis_M04-240196	0.7376
N.gonorrhoeae_FA_1090	N.meningitidis_M01-240355	0.7422
N.gonorrhoeae_FA_1090	N.meningitidis_M01-240149	0.7425
N.gonorrhoeae_FA_1090	N.meningitidis_LNP21362	0.7422
N.gonorrhoeae_FA_1090	N.meningitidis_L91543	0.7413
N.gonorrhoeae_FA_1090	N.meningitidis_H44_76	0.74
N.gonorrhoeae_FA_1090	N.meningitidis_G2136	0.7441
N.gonorrhoeae_FA_1090	N.meningitidis_FDAARGOS_215	0.7372
N.gonorrhoeae_FA_1090	N.meningitidis_FDAARGOS_214	0.7183
N.gonorrhoeae_FA_1090	N.meningitidis_FDAARGOS_212	0.7326
N.gonorrhoeae_FA_1090	N.meningitidis_FDAARGOS_211	0.7364
N.gonorrhoeae_FA_1090	N.meningitidis_FDAARGOS_210	0.7368
N.gonorrhoeae_FA_1090	N.meningitidis_FDAARGOS_209	0.736
N.gonorrhoeae_FA_1090	N.meningitidis_FAM18	0.749
N.gonorrhoeae_FA_1090	N.meningitidis_DE8669	0.7389
N.gonorrhoeae_FA_1090	N.meningitidis_DE8555	0.7412
N.gonorrhoeae_FA_1090	N.meningitidis_DE10444	0.7501
N.gonorrhoeae_FA_1090	N.meningitidis_COL-201504-11	0.7455
N.gonorrhoeae_FA_1090	N.meningitidis_B6116_77	0.7408
N.gonorrhoeae_FA_1090	N.meningitidis_alpha710	0.7436
N.gonorrhoeae_FA_1090	N.meningitidis_alpha14	0.7465
N.gonorrhoeae_FA_1090	N.meningitidis_8013	0.7316
N.gonorrhoeae_FA_1090	N.meningitidis_510612	0.7404
N.gonorrhoeae_FA_1090	N.meningitidis_38277	0.7382
N.gonorrhoeae_FA_1090	N.meningitidis_331401	0.7417
N.gonorrhoeae_FA_1090	N.meningitidis_053442	0.749
N.gonorrhoeae_FA_1090	N.gonorrhoeae_NCTC13800	0.919
N.gonorrhoeae_FA_1090	N.gonorrhoeae_NCTC13799	0.9281
N.gonorrhoeae_FA_1090	N.gonorrhoeae_NCTC13798	0.9168
N.gonorrhoeae_FA_1090	N.gonorrhoeae_NCCP11945	0.9155
N.gonorrhoeae_FA_1090	N.gonorrhoeae_MS11	0.9128
N.gonorrhoeae_FA_1090	N.gonorrhoeae_FDAARGOS_207	0.91
N.gonorrhoeae_FA_1090	N.gonorrhoeae_FDAARGOS_205	0.9075
N.gonorrhoeae_FA_1090	N.gonorrhoeae_FDAARGOS_204	0.9156
N.gonorrhoeae_FA_1090	N.gonorrhoeae_FA6140	0.9347
N.gonorrhoeae_FA_1090	N.gonorrhoeae_FA19	0.9181
N.gonorrhoeae_FA_1090	N.gonorrhoeae_FA_1090	0.0415
N.gonorrhoeae_FA19	N.zoodegmatis_NCTC12230	0.5335
N.gonorrhoeae_FA19	N.weaveri_NCTC13585	0.5826
N.gonorrhoeae_FA19	N.mucosa_C102	0.6288
N.gonorrhoeae_FA19	N.elongata_ATCC_29315	0.5669
N.gonorrhoeae_FA19	N.lactamica_Y92-1009	0.7006
N.gonorrhoeae_FA19	N.lactamica_ATCC_23970	0.7015
N.gonorrhoeae_FA19	N.lactamica_020-06	0.6963
N.gonorrhoeae_FA19	N.meningitidis_Z2491	0.7307
N.gonorrhoeae_FA19	N.meningitidis_WUE_2594	0.7393
N.gonorrhoeae_FA19	N.meningitidis_WUE2121	0.728
N.gonorrhoeae_FA19	N.meningitidis_NZ-05_33	0.7305
N.gonorrhoeae_FA19	N.meningitidis_NM3686	0.7322
N.gonorrhoeae_FA19	N.meningitidis_NM3683	0.7312
N.gonorrhoeae_FA19	N.meningitidis_NM3682	0.732
N.gonorrhoeae_FA19	N.meningitidis_MC58	0.7303
N.gonorrhoeae_FA19	N.meningitidis_M7124	0.73
N.gonorrhoeae_FA19	N.meningitidis_M27559	0.7285
N.gonorrhoeae_FA19	N.meningitidis_M25476	0.7275
N.gonorrhoeae_FA19	N.meningitidis_M25474	0.7282
N.gonorrhoeae_FA19	N.meningitidis_M25472	0.7264
N.gonorrhoeae_FA19	N.meningitidis_M25462	0.7285
N.gonorrhoeae_FA19	N.meningitidis_M25459	0.7285
N.gonorrhoeae_FA19	N.meningitidis_M25456	0.7273
N.gonorrhoeae_FA19	N.meningitidis_M25438	0.7303
N.gonorrhoeae_FA19	N.meningitidis_M25419	0.7297
N.gonorrhoeae_FA19	N.meningitidis_M25087	0.7279
N.gonorrhoeae_FA19	N.meningitidis_M25074	0.7237
N.gonorrhoeae_FA19	N.meningitidis_M25073	0.7286
N.gonorrhoeae_FA19	N.meningitidis_M25070	0.7287
N.gonorrhoeae_FA19	N.meningitidis_M24730	0.7309
N.gonorrhoeae_FA19	N.meningitidis_M24705	0.734
N.gonorrhoeae_FA19	N.meningitidis_M23413	0.7292
N.gonorrhoeae_FA19	N.meningitidis_M22828	0.7322
N.gonorrhoeae_FA19	N.meningitidis_M22822	0.7319
N.gonorrhoeae_FA19	N.meningitidis_M22819	0.7358
N.gonorrhoeae_FA19	N.meningitidis_M22811	0.7335
N.gonorrhoeae_FA19	N.meningitidis_M22809	0.7332
N.gonorrhoeae_FA19	N.meningitidis_M22804	0.7293
N.gonorrhoeae_FA19	N.meningitidis_M22801	0.7286
N.gonorrhoeae_FA19	N.meningitidis_M22797	0.7292
N.gonorrhoeae_FA19	N.meningitidis_M22790	0.7241
N.gonorrhoeae_FA19	N.meningitidis_M22783	0.7301
N.gonorrhoeae_FA19	N.meningitidis_M22772	0.7315
N.gonorrhoeae_FA19	N.meningitidis_M22769	0.7329
N.gonorrhoeae_FA19	N.meningitidis_M22759	0.735
N.gonorrhoeae_FA19	N.meningitidis_M22748	0.7313
N.gonorrhoeae_FA19	N.meningitidis_M22747	0.7283
N.gonorrhoeae_FA19	N.meningitidis_M22745	0.732
N.gonorrhoeae_FA19	N.meningitidis_M22740	0.7291
N.gonorrhoeae_FA19	N.meningitidis_M22722	0.7305
N.gonorrhoeae_FA19	N.meningitidis_M22718	0.7302
N.gonorrhoeae_FA19	N.meningitidis_M22191	0.7318
N.gonorrhoeae_FA19	N.meningitidis_M22189	0.73
N.gonorrhoeae_FA19	N.meningitidis_M22160	0.7274
N.gonorrhoeae_FA19	N.meningitidis_M12752	0.7287
N.gonorrhoeae_FA19	N.meningitidis_M10208	0.7248
N.gonorrhoeae_FA19	N.meningitidis_M09293	0.7286
N.gonorrhoeae_FA19	N.meningitidis_M09261	0.731
N.gonorrhoeae_FA19	N.meningitidis_M08001	0.7307
N.gonorrhoeae_FA19	N.meningitidis_M08000	0.7307
N.gonorrhoeae_FA19	N.meningitidis_M07999	0.7308
N.gonorrhoeae_FA19	N.meningitidis_M07165	0.7259
N.gonorrhoeae_FA19	N.meningitidis_M07162	0.726
N.gonorrhoeae_FA19	N.meningitidis_M07161	0.7277
N.gonorrhoeae_FA19	N.meningitidis_M07149	0.7287
N.gonorrhoeae_FA19	N.meningitidis_M0579	0.735
N.gonorrhoeae_FA19	N.meningitidis_M04-240196	0.7308
N.gonorrhoeae_FA19	N.meningitidis_M01-240355	0.7324
N.gonorrhoeae_FA19	N.meningitidis_M01-240149	0.7346
N.gonorrhoeae_FA19	N.meningitidis_LNP21362	0.7296
N.gonorrhoeae_FA19	N.meningitidis_L91543	0.7294
N.gonorrhoeae_FA19	N.meningitidis_H44_76	0.7297
N.gonorrhoeae_FA19	N.meningitidis_G2136	0.7333
N.gonorrhoeae_FA19	N.meningitidis_FDAARGOS_215	0.7292
N.gonorrhoeae_FA19	N.meningitidis_FDAARGOS_214	0.7291
N.gonorrhoeae_FA19	N.meningitidis_FDAARGOS_212	0.7398
N.gonorrhoeae_FA19	N.meningitidis_FDAARGOS_211	0.7276
N.gonorrhoeae_FA19	N.meningitidis_FDAARGOS_210	0.7293
N.gonorrhoeae_FA19	N.meningitidis_FDAARGOS_209	0.7246
N.gonorrhoeae_FA19	N.meningitidis_FAM18	0.7368
N.gonorrhoeae_FA19	N.meningitidis_DE8669	0.7295
N.gonorrhoeae_FA19	N.meningitidis_DE8555	0.7298
N.gonorrhoeae_FA19	N.meningitidis_DE10444	0.7402
N.gonorrhoeae_FA19	N.meningitidis_COL-201504-11	0.7338
N.gonorrhoeae_FA19	N.meningitidis_B6116_77	0.7314
N.gonorrhoeae_FA19	N.meningitidis_alpha710	0.732
N.gonorrhoeae_FA19	N.meningitidis_alpha14	0.7277
N.gonorrhoeae_FA19	N.meningitidis_8013	0.7259
N.gonorrhoeae_FA19	N.meningitidis_510612	0.7298
N.gonorrhoeae_FA19	N.meningitidis_38277	0.7282
N.gonorrhoeae_FA19	N.meningitidis_331401	0.7301
N.gonorrhoeae_FA19	N.meningitidis_053442	0.7397
N.gonorrhoeae_FA19	N.gonorrhoeae_NCTC13800	0.928
N.gonorrhoeae_FA19	N.gonorrhoeae_NCTC13799	0.9172
N.gonorrhoeae_FA19	N.gonorrhoeae_NCTC13798	0.9271
N.gonorrhoeae_FA19	N.gonorrhoeae_NCCP11945	0.9303
N.gonorrhoeae_FA19	N.gonorrhoeae_MS11	0.9271
N.gonorrhoeae_FA19	N.gonorrhoeae_FDAARGOS_207	0.9243
N.gonorrhoeae_FA19	N.gonorrhoeae_FDAARGOS_205	0.919
N.gonorrhoeae_FA19	N.gonorrhoeae_FDAARGOS_204	0.9371
N.gonorrhoeae_FA19	N.gonorrhoeae_FA6140	0.9232
N.gonorrhoeae_FA19	N.gonorrhoeae_FA19	0.0363
N.gonorrhoeae_FA6140	N.zoodegmatis_NCTC12230	0.54
N.gonorrhoeae_FA6140	N.weaveri_NCTC13585	0.5915
N.gonorrhoeae_FA6140	N.mucosa_C102	0.6387
N.gonorrhoeae_FA6140	N.elongata_ATCC_29315	0.576
N.gonorrhoeae_FA6140	N.lactamica_Y92-1009	0.7094
N.gonorrhoeae_FA6140	N.lactamica_ATCC_23970	0.7108
N.gonorrhoeae_FA6140	N.lactamica_020-06	0.7045
N.gonorrhoeae_FA6140	N.meningitidis_Z2491	0.74
N.gonorrhoeae_FA6140	N.meningitidis_WUE_2594	0.7465
N.gonorrhoeae_FA6140	N.meningitidis_WUE2121	0.735
N.gonorrhoeae_FA6140	N.meningitidis_NZ-05_33	0.7376
N.gonorrhoeae_FA6140	N.meningitidis_NM3686	0.7437
N.gonorrhoeae_FA6140	N.meningitidis_NM3683	0.7382
N.gonorrhoeae_FA6140	N.meningitidis_NM3682	0.7391
N.gonorrhoeae_FA6140	N.meningitidis_MC58	0.7361
N.gonorrhoeae_FA6140	N.meningitidis_M7124	0.7388
N.gonorrhoeae_FA6140	N.meningitidis_M27559	0.7369
N.gonorrhoeae_FA6140	N.meningitidis_M25476	0.7354
N.gonorrhoeae_FA6140	N.meningitidis_M25474	0.7374
N.gonorrhoeae_FA6140	N.meningitidis_M25472	0.7364
N.gonorrhoeae_FA6140	N.meningitidis_M25462	0.7368
N.gonorrhoeae_FA6140	N.meningitidis_M25459	0.7381
N.gonorrhoeae_FA6140	N.meningitidis_M25456	0.7369
N.gonorrhoeae_FA6140	N.meningitidis_M25438	0.7396
N.gonorrhoeae_FA6140	N.meningitidis_M25419	0.7398
N.gonorrhoeae_FA6140	N.meningitidis_M25087	0.7371
N.gonorrhoeae_FA6140	N.meningitidis_M25074	0.7314
N.gonorrhoeae_FA6140	N.meningitidis_M25073	0.7348
N.gonorrhoeae_FA6140	N.meningitidis_M25070	0.7361
N.gonorrhoeae_FA6140	N.meningitidis_M24730	0.7388
N.gonorrhoeae_FA6140	N.meningitidis_M24705	0.7452
N.gonorrhoeae_FA6140	N.meningitidis_M23413	0.738
N.gonorrhoeae_FA6140	N.meningitidis_M22828	0.7443
N.gonorrhoeae_FA6140	N.meningitidis_M22822	0.743
N.gonorrhoeae_FA6140	N.meningitidis_M22819	0.7453
N.gonorrhoeae_FA6140	N.meningitidis_M22811	0.7438
N.gonorrhoeae_FA6140	N.meningitidis_M22809	0.7453
N.gonorrhoeae_FA6140	N.meningitidis_M22804	0.7412
N.gonorrhoeae_FA6140	N.meningitidis_M22801	0.7369
N.gonorrhoeae_FA6140	N.meningitidis_M22797	0.7367
N.gonorrhoeae_FA6140	N.meningitidis_M22790	0.7346
N.gonorrhoeae_FA6140	N.meningitidis_M22783	0.743
N.gonorrhoeae_FA6140	N.meningitidis_M22772	0.7394
N.gonorrhoeae_FA6140	N.meningitidis_M22769	0.7409
N.gonorrhoeae_FA6140	N.meningitidis_M22759	0.7422
N.gonorrhoeae_FA6140	N.meningitidis_M22748	0.7405
N.gonorrhoeae_FA6140	N.meningitidis_M22747	0.7379
N.gonorrhoeae_FA6140	N.meningitidis_M22745	0.7404
N.gonorrhoeae_FA6140	N.meningitidis_M22740	0.7378
N.gonorrhoeae_FA6140	N.meningitidis_M22722	0.7384
N.gonorrhoeae_FA6140	N.meningitidis_M22718	0.7386
N.gonorrhoeae_FA6140	N.meningitidis_M22191	0.7403
N.gonorrhoeae_FA6140	N.meningitidis_M22189	0.7384
N.gonorrhoeae_FA6140	N.meningitidis_M22160	0.7366
N.gonorrhoeae_FA6140	N.meningitidis_M12752	0.7365
N.gonorrhoeae_FA6140	N.meningitidis_M10208	0.7334
N.gonorrhoeae_FA6140	N.meningitidis_M09293	0.7369
N.gonorrhoeae_FA6140	N.meningitidis_M09261	0.7381
N.gonorrhoeae_FA6140	N.meningitidis_M08001	0.7382
N.gonorrhoeae_FA6140	N.meningitidis_M08000	0.7382
N.gonorrhoeae_FA6140	N.meningitidis_M07999	0.7387
N.gonorrhoeae_FA6140	N.meningitidis_M07165	0.7354
N.gonorrhoeae_FA6140	N.meningitidis_M07162	0.7351
N.gonorrhoeae_FA6140	N.meningitidis_M07161	0.7359
N.gonorrhoeae_FA6140	N.meningitidis_M07149	0.7374
N.gonorrhoeae_FA6140	N.meningitidis_M0579	0.7405
N.gonorrhoeae_FA6140	N.meningitidis_M04-240196	0.7361
N.gonorrhoeae_FA6140	N.meningitidis_M01-240355	0.7395
N.gonorrhoeae_FA6140	N.meningitidis_M01-240149	0.7401
N.gonorrhoeae_FA6140	N.meningitidis_LNP21362	0.7332
N.gonorrhoeae_FA6140	N.meningitidis_L91543	0.7378
N.gonorrhoeae_FA6140	N.meningitidis_H44_76	0.7359
N.gonorrhoeae_FA6140	N.meningitidis_G2136	0.7387
N.gonorrhoeae_FA6140	N.meningitidis_FDAARGOS_215	0.7362
N.gonorrhoeae_FA6140	N.meningitidis_FDAARGOS_214	0.7209
N.gonorrhoeae_FA6140	N.meningitidis_FDAARGOS_212	0.7295
N.gonorrhoeae_FA6140	N.meningitidis_FDAARGOS_211	0.735
N.gonorrhoeae_FA6140	N.meningitidis_FDAARGOS_210	0.7351
N.gonorrhoeae_FA6140	N.meningitidis_FDAARGOS_209	0.7346
N.gonorrhoeae_FA6140	N.meningitidis_FAM18	0.7445
N.gonorrhoeae_FA6140	N.meningitidis_DE8669	0.7366
N.gonorrhoeae_FA6140	N.meningitidis_DE8555	0.7364
N.gonorrhoeae_FA6140	N.meningitidis_DE10444	0.7494
N.gonorrhoeae_FA6140	N.meningitidis_COL-201504-11	0.741
N.gonorrhoeae_FA6140	N.meningitidis_B6116_77	0.7372
N.gonorrhoeae_FA6140	N.meningitidis_alpha710	0.7382
N.gonorrhoeae_FA6140	N.meningitidis_alpha14	0.738
N.gonorrhoeae_FA6140	N.meningitidis_8013	0.7324
N.gonorrhoeae_FA6140	N.meningitidis_510612	0.7382
N.gonorrhoeae_FA6140	N.meningitidis_38277	0.7352
N.gonorrhoeae_FA6140	N.meningitidis_331401	0.7398
N.gonorrhoeae_FA6140	N.meningitidis_053442	0.7467
N.gonorrhoeae_FA6140	N.gonorrhoeae_NCTC13800	0.9284
N.gonorrhoeae_FA6140	N.gonorrhoeae_NCTC13799	0.9307
N.gonorrhoeae_FA6140	N.gonorrhoeae_NCTC13798	0.9249
N.gonorrhoeae_FA6140	N.gonorrhoeae_NCCP11945	0.9236
N.gonorrhoeae_FA6140	N.gonorrhoeae_MS11	0.9195
N.gonorrhoeae_FA6140	N.gonorrhoeae_FDAARGOS_207	0.9119
N.gonorrhoeae_FA6140	N.gonorrhoeae_FDAARGOS_205	0.908
N.gonorrhoeae_FA6140	N.gonorrhoeae_FDAARGOS_204	0.917
N.gonorrhoeae_FA6140	N.gonorrhoeae_FA6140	0.0406
N.gonorrhoeae_FDAARGOS_204	N.zoodegmatis_NCTC12230	0.535
N.gonorrhoeae_FDAARGOS_204	N.weaveri_NCTC13585	0.585
N.gonorrhoeae_FDAARGOS_204	N.mucosa_C102	0.6305
N.gonorrhoeae_FDAARGOS_204	N.elongata_ATCC_29315	0.5687
N.gonorrhoeae_FDAARGOS_204	N.lactamica_Y92-1009	0.7026
N.gonorrhoeae_FDAARGOS_204	N.lactamica_ATCC_23970	0.7035
N.gonorrhoeae_FDAARGOS_204	N.lactamica_020-06	0.6983
N.gonorrhoeae_FDAARGOS_204	N.meningitidis_Z2491	0.7332
N.gonorrhoeae_FDAARGOS_204	N.meningitidis_WUE_2594	0.7419
N.gonorrhoeae_FDAARGOS_204	N.meningitidis_WUE2121	0.7293
N.gonorrhoeae_FDAARGOS_204	N.meningitidis_NZ-05_33	0.7326
N.gonorrhoeae_FDAARGOS_204	N.meningitidis_NM3686	0.7361
N.gonorrhoeae_FDAARGOS_204	N.meningitidis_NM3683	0.7308
N.gonorrhoeae_FDAARGOS_204	N.meningitidis_NM3682	0.7321
N.gonorrhoeae_FDAARGOS_204	N.meningitidis_MC58	0.7321
N.gonorrhoeae_FDAARGOS_204	N.meningitidis_M7124	0.7317
N.gonorrhoeae_FDAARGOS_204	N.meningitidis_M27559	0.7294
N.gonorrhoeae_FDAARGOS_204	N.meningitidis_M25476	0.7284
N.gonorrhoeae_FDAARGOS_204	N.meningitidis_M25474	0.7291
N.gonorrhoeae_FDAARGOS_204	N.meningitidis_M25472	0.7281
N.gonorrhoeae_FDAARGOS_204	N.meningitidis_M25462	0.7293
N.gonorrhoeae_FDAARGOS_204	N.meningitidis_M25459	0.7297
N.gonorrhoeae_FDAARGOS_204	N.meningitidis_M25456	0.729
N.gonorrhoeae_FDAARGOS_204	N.meningitidis_M25438	0.7316
N.gonorrhoeae_FDAARGOS_204	N.meningitidis_M25419	0.7327
N.gonorrhoeae_FDAARGOS_204	N.meningitidis_M25087	0.7296
N.gonorrhoeae_FDAARGOS_204	N.meningitidis_M25074	0.7262
N.gonorrhoeae_FDAARGOS_204	N.meningitidis_M25073	0.7295
N.gonorrhoeae_FDAARGOS_204	N.meningitidis_M25070	0.7282
N.gonorrhoeae_FDAARGOS_204	N.meningitidis_M24730	0.7313
N.gonorrhoeae_FDAARGOS_204	N.meningitidis_M24705	0.7401
N.gonorrhoeae_FDAARGOS_204	N.meningitidis_M23413	0.7301
N.gonorrhoeae_FDAARGOS_204	N.meningitidis_M22828	0.7379
N.gonorrhoeae_FDAARGOS_204	N.meningitidis_M22822	0.7384
N.gonorrhoeae_FDAARGOS_204	N.meningitidis_M22819	0.7414
N.gonorrhoeae_FDAARGOS_204	N.meningitidis_M22811	0.7378
N.gonorrhoeae_FDAARGOS_204	N.meningitidis_M22809	0.7385
N.gonorrhoeae_FDAARGOS_204	N.meningitidis_M22804	0.7362
N.gonorrhoeae_FDAARGOS_204	N.meningitidis_M22801	0.7299
N.gonorrhoeae_FDAARGOS_204	N.meningitidis_M22797	0.7297
N.gonorrhoeae_FDAARGOS_204	N.meningitidis_M22790	0.7309
N.gonorrhoeae_FDAARGOS_204	N.meningitidis_M22783	0.7349
N.gonorrhoeae_FDAARGOS_204	N.meningitidis_M22772	0.7332
N.gonorrhoeae_FDAARGOS_204	N.meningitidis_M22769	0.7342
N.gonorrhoeae_FDAARGOS_204	N.meningitidis_M22759	0.7376
N.gonorrhoeae_FDAARGOS_204	N.meningitidis_M22748	0.733
N.gonorrhoeae_FDAARGOS_204	N.meningitidis_M22747	0.73
N.gonorrhoeae_FDAARGOS_204	N.meningitidis_M22745	0.7329
N.gonorrhoeae_FDAARGOS_204	N.meningitidis_M22740	0.7304
N.gonorrhoeae_FDAARGOS_204	N.meningitidis_M22722	0.7305
N.gonorrhoeae_FDAARGOS_204	N.meningitidis_M22718	0.7311
N.gonorrhoeae_FDAARGOS_204	N.meningitidis_M22191	0.7336
N.gonorrhoeae_FDAARGOS_204	N.meningitidis_M22189	0.7317
N.gonorrhoeae_FDAARGOS_204	N.meningitidis_M22160	0.7291
N.gonorrhoeae_FDAARGOS_204	N.meningitidis_M12752	0.7299
N.gonorrhoeae_FDAARGOS_204	N.meningitidis_M10208	0.7269
N.gonorrhoeae_FDAARGOS_204	N.meningitidis_M09293	0.7303
N.gonorrhoeae_FDAARGOS_204	N.meningitidis_M09261	0.7323
N.gonorrhoeae_FDAARGOS_204	N.meningitidis_M08001	0.7315
N.gonorrhoeae_FDAARGOS_204	N.meningitidis_M08000	0.7315
N.gonorrhoeae_FDAARGOS_204	N.meningitidis_M07999	0.7321
N.gonorrhoeae_FDAARGOS_204	N.meningitidis_M07165	0.7285
N.gonorrhoeae_FDAARGOS_204	N.meningitidis_M07162	0.7277
N.gonorrhoeae_FDAARGOS_204	N.meningitidis_M07161	0.7277
N.gonorrhoeae_FDAARGOS_204	N.meningitidis_M07149	0.7291
N.gonorrhoeae_FDAARGOS_204	N.meningitidis_M0579	0.7342
N.gonorrhoeae_FDAARGOS_204	N.meningitidis_M04-240196	0.7312
N.gonorrhoeae_FDAARGOS_204	N.meningitidis_M01-240355	0.7342
N.gonorrhoeae_FDAARGOS_204	N.meningitidis_M01-240149	0.7347
N.gonorrhoeae_FDAARGOS_204	N.meningitidis_LNP21362	0.7313
N.gonorrhoeae_FDAARGOS_204	N.meningitidis_L91543	0.732
N.gonorrhoeae_FDAARGOS_204	N.meningitidis_H44_76	0.7297
N.gonorrhoeae_FDAARGOS_204	N.meningitidis_G2136	0.7359
N.gonorrhoeae_FDAARGOS_204	N.meningitidis_FDAARGOS_215	0.7296
N.gonorrhoeae_FDAARGOS_204	N.meningitidis_FDAARGOS_214	0.7336
N.gonorrhoeae_FDAARGOS_204	N.meningitidis_FDAARGOS_212	0.742
N.gonorrhoeae_FDAARGOS_204	N.meningitidis_FDAARGOS_211	0.7288
N.gonorrhoeae_FDAARGOS_204	N.meningitidis_FDAARGOS_210	0.7293
N.gonorrhoeae_FDAARGOS_204	N.meningitidis_FDAARGOS_209	0.7284
N.gonorrhoeae_FDAARGOS_204	N.meningitidis_FAM18	0.7386
N.gonorrhoeae_FDAARGOS_204	N.meningitidis_DE8669	0.7321
N.gonorrhoeae_FDAARGOS_204	N.meningitidis_DE8555	0.7311
N.gonorrhoeae_FDAARGOS_204	N.meningitidis_DE10444	0.7424
N.gonorrhoeae_FDAARGOS_204	N.meningitidis_COL-201504-11	0.739
N.gonorrhoeae_FDAARGOS_204	N.meningitidis_B6116_77	0.731
N.gonorrhoeae_FDAARGOS_204	N.meningitidis_alpha710	0.7341
N.gonorrhoeae_FDAARGOS_204	N.meningitidis_alpha14	0.7317
N.gonorrhoeae_FDAARGOS_204	N.meningitidis_8013	0.7301
N.gonorrhoeae_FDAARGOS_204	N.meningitidis_510612	0.7341
N.gonorrhoeae_FDAARGOS_204	N.meningitidis_38277	0.729
N.gonorrhoeae_FDAARGOS_204	N.meningitidis_331401	0.7361
N.gonorrhoeae_FDAARGOS_204	N.meningitidis_053442	0.7407
N.gonorrhoeae_FDAARGOS_204	N.gonorrhoeae_NCTC13800	0.9222
N.gonorrhoeae_FDAARGOS_204	N.gonorrhoeae_NCTC13799	0.9135
N.gonorrhoeae_FDAARGOS_204	N.gonorrhoeae_NCTC13798	0.923
N.gonorrhoeae_FDAARGOS_204	N.gonorrhoeae_NCCP11945	0.9242
N.gonorrhoeae_FDAARGOS_204	N.gonorrhoeae_MS11	0.9243
N.gonorrhoeae_FDAARGOS_204	N.gonorrhoeae_FDAARGOS_207	0.9156
N.gonorrhoeae_FDAARGOS_204	N.gonorrhoeae_FDAARGOS_205	0.9174
N.gonorrhoeae_FDAARGOS_204	N.gonorrhoeae_FDAARGOS_204	0.0387
N.gonorrhoeae_FDAARGOS_205	N.zoodegmatis_NCTC12230	0.5255
N.gonorrhoeae_FDAARGOS_205	N.weaveri_NCTC13585	0.5732
N.gonorrhoeae_FDAARGOS_205	N.mucosa_C102	0.6176
N.gonorrhoeae_FDAARGOS_205	N.elongata_ATCC_29315	0.5568
N.gonorrhoeae_FDAARGOS_205	N.lactamica_Y92-1009	0.6881
N.gonorrhoeae_FDAARGOS_205	N.lactamica_ATCC_23970	0.6867
N.gonorrhoeae_FDAARGOS_205	N.lactamica_020-06	0.6839
N.gonorrhoeae_FDAARGOS_205	N.meningitidis_Z2491	0.7189
N.gonorrhoeae_FDAARGOS_205	N.meningitidis_WUE_2594	0.7235
N.gonorrhoeae_FDAARGOS_205	N.meningitidis_WUE2121	0.7172
N.gonorrhoeae_FDAARGOS_205	N.meningitidis_NZ-05_33	0.7187
N.gonorrhoeae_FDAARGOS_205	N.meningitidis_NM3686	0.7229
N.gonorrhoeae_FDAARGOS_205	N.meningitidis_NM3683	0.7183
N.gonorrhoeae_FDAARGOS_205	N.meningitidis_NM3682	0.7199
N.gonorrhoeae_FDAARGOS_205	N.meningitidis_MC58	0.7177
N.gonorrhoeae_FDAARGOS_205	N.meningitidis_M7124	0.7193
N.gonorrhoeae_FDAARGOS_205	N.meningitidis_M27559	0.7177
N.gonorrhoeae_FDAARGOS_205	N.meningitidis_M25476	0.7158
N.gonorrhoeae_FDAARGOS_205	N.meningitidis_M25474	0.7186
N.gonorrhoeae_FDAARGOS_205	N.meningitidis_M25472	0.7181
N.gonorrhoeae_FDAARGOS_205	N.meningitidis_M25462	0.7176
N.gonorrhoeae_FDAARGOS_205	N.meningitidis_M25459	0.7189
N.gonorrhoeae_FDAARGOS_205	N.meningitidis_M25456	0.7178
N.gonorrhoeae_FDAARGOS_205	N.meningitidis_M25438	0.7204
N.gonorrhoeae_FDAARGOS_205	N.meningitidis_M25419	0.7202
N.gonorrhoeae_FDAARGOS_205	N.meningitidis_M25087	0.7184
N.gonorrhoeae_FDAARGOS_205	N.meningitidis_M25074	0.7126
N.gonorrhoeae_FDAARGOS_205	N.meningitidis_M25073	0.7174
N.gonorrhoeae_FDAARGOS_205	N.meningitidis_M25070	0.719
N.gonorrhoeae_FDAARGOS_205	N.meningitidis_M24730	0.7208
N.gonorrhoeae_FDAARGOS_205	N.meningitidis_M24705	0.7221
N.gonorrhoeae_FDAARGOS_205	N.meningitidis_M23413	0.7187
N.gonorrhoeae_FDAARGOS_205	N.meningitidis_M22828	0.72
N.gonorrhoeae_FDAARGOS_205	N.meningitidis_M22822	0.7196
N.gonorrhoeae_FDAARGOS_205	N.meningitidis_M22819	0.7233
N.gonorrhoeae_FDAARGOS_205	N.meningitidis_M22811	0.7216
N.gonorrhoeae_FDAARGOS_205	N.meningitidis_M22809	0.72
N.gonorrhoeae_FDAARGOS_205	N.meningitidis_M22804	0.7182
N.gonorrhoeae_FDAARGOS_205	N.meningitidis_M22801	0.7187
N.gonorrhoeae_FDAARGOS_205	N.meningitidis_M22797	0.7189
N.gonorrhoeae_FDAARGOS_205	N.meningitidis_M22790	0.714
N.gonorrhoeae_FDAARGOS_205	N.meningitidis_M22783	0.7182
N.gonorrhoeae_FDAARGOS_205	N.meningitidis_M22772	0.7199
N.gonorrhoeae_FDAARGOS_205	N.meningitidis_M22769	0.7241
N.gonorrhoeae_FDAARGOS_205	N.meningitidis_M22759	0.7249
N.gonorrhoeae_FDAARGOS_205	N.meningitidis_M22748	0.7212
N.gonorrhoeae_FDAARGOS_205	N.meningitidis_M22747	0.7178
N.gonorrhoeae_FDAARGOS_205	N.meningitidis_M22745	0.7191
N.gonorrhoeae_FDAARGOS_205	N.meningitidis_M22740	0.7195
N.gonorrhoeae_FDAARGOS_205	N.meningitidis_M22722	0.7183
N.gonorrhoeae_FDAARGOS_205	N.meningitidis_M22718	0.7199
N.gonorrhoeae_FDAARGOS_205	N.meningitidis_M22191	0.72
N.gonorrhoeae_FDAARGOS_205	N.meningitidis_M22189	0.7189
N.gonorrhoeae_FDAARGOS_205	N.meningitidis_M22160	0.7187
N.gonorrhoeae_FDAARGOS_205	N.meningitidis_M12752	0.7178
N.gonorrhoeae_FDAARGOS_205	N.meningitidis_M10208	0.7159
N.gonorrhoeae_FDAARGOS_205	N.meningitidis_M09293	0.717
N.gonorrhoeae_FDAARGOS_205	N.meningitidis_M09261	0.7169
N.gonorrhoeae_FDAARGOS_205	N.meningitidis_M08001	0.7182
N.gonorrhoeae_FDAARGOS_205	N.meningitidis_M08000	0.719
N.gonorrhoeae_FDAARGOS_205	N.meningitidis_M07999	0.7186
N.gonorrhoeae_FDAARGOS_205	N.meningitidis_M07165	0.7161
N.gonorrhoeae_FDAARGOS_205	N.meningitidis_M07162	0.7182
N.gonorrhoeae_FDAARGOS_205	N.meningitidis_M07161	0.716
N.gonorrhoeae_FDAARGOS_205	N.meningitidis_M07149	0.7166
N.gonorrhoeae_FDAARGOS_205	N.meningitidis_M0579	0.7215
N.gonorrhoeae_FDAARGOS_205	N.meningitidis_M04-240196	0.7174
N.gonorrhoeae_FDAARGOS_205	N.meningitidis_M01-240355	0.719
N.gonorrhoeae_FDAARGOS_205	N.meningitidis_M01-240149	0.7229
N.gonorrhoeae_FDAARGOS_205	N.meningitidis_LNP21362	0.7161
N.gonorrhoeae_FDAARGOS_205	N.meningitidis_L91543	0.7206
N.gonorrhoeae_FDAARGOS_205	N.meningitidis_H44_76	0.718
N.gonorrhoeae_FDAARGOS_205	N.meningitidis_G2136	0.7203
N.gonorrhoeae_FDAARGOS_205	N.meningitidis_FDAARGOS_215	0.7181
N.gonorrhoeae_FDAARGOS_205	N.meningitidis_FDAARGOS_214	0.7173
N.gonorrhoeae_FDAARGOS_205	N.meningitidis_FDAARGOS_212	0.7285
N.gonorrhoeae_FDAARGOS_205	N.meningitidis_FDAARGOS_211	0.7152
N.gonorrhoeae_FDAARGOS_205	N.meningitidis_FDAARGOS_210	0.7154
N.gonorrhoeae_FDAARGOS_205	N.meningitidis_FDAARGOS_209	0.7117
N.gonorrhoeae_FDAARGOS_205	N.meningitidis_FAM18	0.7269
N.gonorrhoeae_FDAARGOS_205	N.meningitidis_DE8669	0.719
N.gonorrhoeae_FDAARGOS_205	N.meningitidis_DE8555	0.7185
N.gonorrhoeae_FDAARGOS_205	N.meningitidis_DE10444	0.7276
N.gonorrhoeae_FDAARGOS_205	N.meningitidis_COL-201504-11	0.7229
N.gonorrhoeae_FDAARGOS_205	N.meningitidis_B6116_77	0.7193
N.gonorrhoeae_FDAARGOS_205	N.meningitidis_alpha710	0.7224
N.gonorrhoeae_FDAARGOS_205	N.meningitidis_alpha14	0.7188
N.gonorrhoeae_FDAARGOS_205	N.meningitidis_8013	0.7134
N.gonorrhoeae_FDAARGOS_205	N.meningitidis_510612	0.718
N.gonorrhoeae_FDAARGOS_205	N.meningitidis_38277	0.7199
N.gonorrhoeae_FDAARGOS_205	N.meningitidis_331401	0.7197
N.gonorrhoeae_FDAARGOS_205	N.meningitidis_053442	0.7234
N.gonorrhoeae_FDAARGOS_205	N.gonorrhoeae_NCTC13800	0.9279
N.gonorrhoeae_FDAARGOS_205	N.gonorrhoeae_NCTC13799	0.9128
N.gonorrhoeae_FDAARGOS_205	N.gonorrhoeae_NCTC13798	0.9262
N.gonorrhoeae_FDAARGOS_205	N.gonorrhoeae_NCCP11945	0.9282
N.gonorrhoeae_FDAARGOS_205	N.gonorrhoeae_MS11	0.9174
N.gonorrhoeae_FDAARGOS_205	N.gonorrhoeae_FDAARGOS_207	0.9087
N.gonorrhoeae_FDAARGOS_205	N.gonorrhoeae_FDAARGOS_205	0.0419
N.gonorrhoeae_FDAARGOS_207	N.zoodegmatis_NCTC12230	0.5392
N.gonorrhoeae_FDAARGOS_207	N.weaveri_NCTC13585	0.589
N.gonorrhoeae_FDAARGOS_207	N.mucosa_C102	0.6355
N.gonorrhoeae_FDAARGOS_207	N.elongata_ATCC_29315	0.5726
N.gonorrhoeae_FDAARGOS_207	N.lactamica_Y92-1009	0.7056
N.gonorrhoeae_FDAARGOS_207	N.lactamica_ATCC_23970	0.7042
N.gonorrhoeae_FDAARGOS_207	N.lactamica_020-06	0.6998
N.gonorrhoeae_FDAARGOS_207	N.meningitidis_Z2491	0.7361
N.gonorrhoeae_FDAARGOS_207	N.meningitidis_WUE_2594	0.735
N.gonorrhoeae_FDAARGOS_207	N.meningitidis_WUE2121	0.7336
N.gonorrhoeae_FDAARGOS_207	N.meningitidis_NZ-05_33	0.7354
N.gonorrhoeae_FDAARGOS_207	N.meningitidis_NM3686	0.7397
N.gonorrhoeae_FDAARGOS_207	N.meningitidis_NM3683	0.7357
N.gonorrhoeae_FDAARGOS_207	N.meningitidis_NM3682	0.7369
N.gonorrhoeae_FDAARGOS_207	N.meningitidis_MC58	0.7348
N.gonorrhoeae_FDAARGOS_207	N.meningitidis_M7124	0.7367
N.gonorrhoeae_FDAARGOS_207	N.meningitidis_M27559	0.7359
N.gonorrhoeae_FDAARGOS_207	N.meningitidis_M25476	0.734
N.gonorrhoeae_FDAARGOS_207	N.meningitidis_M25474	0.7352
N.gonorrhoeae_FDAARGOS_207	N.meningitidis_M25472	0.7342
N.gonorrhoeae_FDAARGOS_207	N.meningitidis_M25462	0.7363
N.gonorrhoeae_FDAARGOS_207	N.meningitidis_M25459	0.7363
N.gonorrhoeae_FDAARGOS_207	N.meningitidis_M25456	0.7356
N.gonorrhoeae_FDAARGOS_207	N.meningitidis_M25438	0.7383
N.gonorrhoeae_FDAARGOS_207	N.meningitidis_M25419	0.7356
N.gonorrhoeae_FDAARGOS_207	N.meningitidis_M25087	0.7354
N.gonorrhoeae_FDAARGOS_207	N.meningitidis_M25074	0.7305
N.gonorrhoeae_FDAARGOS_207	N.meningitidis_M25073	0.7343
N.gonorrhoeae_FDAARGOS_207	N.meningitidis_M25070	0.7348
N.gonorrhoeae_FDAARGOS_207	N.meningitidis_M24730	0.7379
N.gonorrhoeae_FDAARGOS_207	N.meningitidis_M24705	0.7404
N.gonorrhoeae_FDAARGOS_207	N.meningitidis_M23413	0.7366
N.gonorrhoeae_FDAARGOS_207	N.meningitidis_M22828	0.7399
N.gonorrhoeae_FDAARGOS_207	N.meningitidis_M22822	0.7382
N.gonorrhoeae_FDAARGOS_207	N.meningitidis_M22819	0.7421
N.gonorrhoeae_FDAARGOS_207	N.meningitidis_M22811	0.7394
N.gonorrhoeae_FDAARGOS_207	N.meningitidis_M22809	0.74
N.gonorrhoeae_FDAARGOS_207	N.meningitidis_M22804	0.7381
N.gonorrhoeae_FDAARGOS_207	N.meningitidis_M22801	0.7348
N.gonorrhoeae_FDAARGOS_207	N.meningitidis_M22797	0.735
N.gonorrhoeae_FDAARGOS_207	N.meningitidis_M22790	0.7332
N.gonorrhoeae_FDAARGOS_207	N.meningitidis_M22783	0.7372
N.gonorrhoeae_FDAARGOS_207	N.meningitidis_M22772	0.7382
N.gonorrhoeae_FDAARGOS_207	N.meningitidis_M22769	0.7409
N.gonorrhoeae_FDAARGOS_207	N.meningitidis_M22759	0.7422
N.gonorrhoeae_FDAARGOS_207	N.meningitidis_M22748	0.7374
N.gonorrhoeae_FDAARGOS_207	N.meningitidis_M22747	0.7361
N.gonorrhoeae_FDAARGOS_207	N.meningitidis_M22745	0.7353
N.gonorrhoeae_FDAARGOS_207	N.meningitidis_M22740	0.7365
N.gonorrhoeae_FDAARGOS_207	N.meningitidis_M22722	0.7362
N.gonorrhoeae_FDAARGOS_207	N.meningitidis_M22718	0.7365
N.gonorrhoeae_FDAARGOS_207	N.meningitidis_M22191	0.7372
N.gonorrhoeae_FDAARGOS_207	N.meningitidis_M22189	0.7367
N.gonorrhoeae_FDAARGOS_207	N.meningitidis_M22160	0.7356
N.gonorrhoeae_FDAARGOS_207	N.meningitidis_M12752	0.7361
N.gonorrhoeae_FDAARGOS_207	N.meningitidis_M10208	0.7318
N.gonorrhoeae_FDAARGOS_207	N.meningitidis_M09293	0.7348
N.gonorrhoeae_FDAARGOS_207	N.meningitidis_M09261	0.7352
N.gonorrhoeae_FDAARGOS_207	N.meningitidis_M08001	0.7356
N.gonorrhoeae_FDAARGOS_207	N.meningitidis_M08000	0.7365
N.gonorrhoeae_FDAARGOS_207	N.meningitidis_M07999	0.7352
N.gonorrhoeae_FDAARGOS_207	N.meningitidis_M07165	0.7338
N.gonorrhoeae_FDAARGOS_207	N.meningitidis_M07162	0.733
N.gonorrhoeae_FDAARGOS_207	N.meningitidis_M07161	0.7333
N.gonorrhoeae_FDAARGOS_207	N.meningitidis_M07149	0.7356
N.gonorrhoeae_FDAARGOS_207	N.meningitidis_M0579	0.7375
N.gonorrhoeae_FDAARGOS_207	N.meningitidis_M04-240196	0.7353
N.gonorrhoeae_FDAARGOS_207	N.meningitidis_M01-240355	0.742
N.gonorrhoeae_FDAARGOS_207	N.meningitidis_M01-240149	0.7397
N.gonorrhoeae_FDAARGOS_207	N.meningitidis_LNP21362	0.7346
N.gonorrhoeae_FDAARGOS_207	N.meningitidis_L91543	0.7368
N.gonorrhoeae_FDAARGOS_207	N.meningitidis_H44_76	0.7334
N.gonorrhoeae_FDAARGOS_207	N.meningitidis_G2136	0.7413
N.gonorrhoeae_FDAARGOS_207	N.meningitidis_FDAARGOS_215	0.7358
N.gonorrhoeae_FDAARGOS_207	N.meningitidis_FDAARGOS_214	0.7367
N.gonorrhoeae_FDAARGOS_207	N.meningitidis_FDAARGOS_212	0.7491
N.gonorrhoeae_FDAARGOS_207	N.meningitidis_FDAARGOS_211	0.7342
N.gonorrhoeae_FDAARGOS_207	N.meningitidis_FDAARGOS_210	0.7315
N.gonorrhoeae_FDAARGOS_207	N.meningitidis_FDAARGOS_209	0.7321
N.gonorrhoeae_FDAARGOS_207	N.meningitidis_FAM18	0.7431
N.gonorrhoeae_FDAARGOS_207	N.meningitidis_DE8669	0.7341
N.gonorrhoeae_FDAARGOS_207	N.meningitidis_DE8555	0.7355
N.gonorrhoeae_FDAARGOS_207	N.meningitidis_DE10444	0.745
N.gonorrhoeae_FDAARGOS_207	N.meningitidis_COL-201504-11	0.7419
N.gonorrhoeae_FDAARGOS_207	N.meningitidis_B6116_77	0.7377
N.gonorrhoeae_FDAARGOS_207	N.meningitidis_alpha710	0.7378
N.gonorrhoeae_FDAARGOS_207	N.meningitidis_alpha14	0.7388
N.gonorrhoeae_FDAARGOS_207	N.meningitidis_8013	0.7315
N.gonorrhoeae_FDAARGOS_207	N.meningitidis_510612	0.7368
N.gonorrhoeae_FDAARGOS_207	N.meningitidis_38277	0.7364
N.gonorrhoeae_FDAARGOS_207	N.meningitidis_331401	0.7385
N.gonorrhoeae_FDAARGOS_207	N.meningitidis_053442	0.7457
N.gonorrhoeae_FDAARGOS_207	N.gonorrhoeae_NCTC13800	0.9261
N.gonorrhoeae_FDAARGOS_207	N.gonorrhoeae_NCTC13799	0.9125
N.gonorrhoeae_FDAARGOS_207	N.gonorrhoeae_NCTC13798	0.9218
N.gonorrhoeae_FDAARGOS_207	N.gonorrhoeae_NCCP11945	0.9213
N.gonorrhoeae_FDAARGOS_207	N.gonorrhoeae_MS11	0.9148
N.gonorrhoeae_FDAARGOS_207	N.gonorrhoeae_FDAARGOS_207	0.0399
N.gonorrhoeae_MS11	N.zoodegmatis_NCTC12230	0.5275
N.gonorrhoeae_MS11	N.weaveri_NCTC13585	0.5766
N.gonorrhoeae_MS11	N.mucosa_C102	0.6207
N.gonorrhoeae_MS11	N.elongata_ATCC_29315	0.5605
N.gonorrhoeae_MS11	N.lactamica_Y92-1009	0.6957
N.gonorrhoeae_MS11	N.lactamica_ATCC_23970	0.691
N.gonorrhoeae_MS11	N.lactamica_020-06	0.6907
N.gonorrhoeae_MS11	N.meningitidis_Z2491	0.7268
N.gonorrhoeae_MS11	N.meningitidis_WUE_2594	0.7355
N.gonorrhoeae_MS11	N.meningitidis_WUE2121	0.723
N.gonorrhoeae_MS11	N.meningitidis_NZ-05_33	0.7246
N.gonorrhoeae_MS11	N.meningitidis_NM3686	0.7284
N.gonorrhoeae_MS11	N.meningitidis_NM3683	0.7253
N.gonorrhoeae_MS11	N.meningitidis_NM3682	0.7257
N.gonorrhoeae_MS11	N.meningitidis_MC58	0.7299
N.gonorrhoeae_MS11	N.meningitidis_M7124	0.7292
N.gonorrhoeae_MS11	N.meningitidis_M27559	0.7252
N.gonorrhoeae_MS11	N.meningitidis_M25476	0.725
N.gonorrhoeae_MS11	N.meningitidis_M25474	0.727
N.gonorrhoeae_MS11	N.meningitidis_M25472	0.7261
N.gonorrhoeae_MS11	N.meningitidis_M25462	0.7268
N.gonorrhoeae_MS11	N.meningitidis_M25459	0.726
N.gonorrhoeae_MS11	N.meningitidis_M25456	0.7256
N.gonorrhoeae_MS11	N.meningitidis_M25438	0.7287
N.gonorrhoeae_MS11	N.meningitidis_M25419	0.7247
N.gonorrhoeae_MS11	N.meningitidis_M25087	0.7258
N.gonorrhoeae_MS11	N.meningitidis_M25074	0.7225
N.gonorrhoeae_MS11	N.meningitidis_M25073	0.7245
N.gonorrhoeae_MS11	N.meningitidis_M25070	0.727
N.gonorrhoeae_MS11	N.meningitidis_M24730	0.7283
N.gonorrhoeae_MS11	N.meningitidis_M24705	0.731
N.gonorrhoeae_MS11	N.meningitidis_M23413	0.7263
N.gonorrhoeae_MS11	N.meningitidis_M22828	0.7297
N.gonorrhoeae_MS11	N.meningitidis_M22822	0.7289
N.gonorrhoeae_MS11	N.meningitidis_M22819	0.7319
N.gonorrhoeae_MS11	N.meningitidis_M22811	0.7305
N.gonorrhoeae_MS11	N.meningitidis_M22809	0.7303
N.gonorrhoeae_MS11	N.meningitidis_M22804	0.7276
N.gonorrhoeae_MS11	N.meningitidis_M22801	0.7269
N.gonorrhoeae_MS11	N.meningitidis_M22797	0.7255
N.gonorrhoeae_MS11	N.meningitidis_M22790	0.7225
N.gonorrhoeae_MS11	N.meningitidis_M22783	0.728
N.gonorrhoeae_MS11	N.meningitidis_M22772	0.7294
N.gonorrhoeae_MS11	N.meningitidis_M22769	0.7295
N.gonorrhoeae_MS11	N.meningitidis_M22759	0.732
N.gonorrhoeae_MS11	N.meningitidis_M22748	0.7288
N.gonorrhoeae_MS11	N.meningitidis_M22747	0.727
N.gonorrhoeae_MS11	N.meningitidis_M22745	0.7274
N.gonorrhoeae_MS11	N.meningitidis_M22740	0.727
N.gonorrhoeae_MS11	N.meningitidis_M22722	0.728
N.gonorrhoeae_MS11	N.meningitidis_M22718	0.729
N.gonorrhoeae_MS11	N.meningitidis_M22191	0.7285
N.gonorrhoeae_MS11	N.meningitidis_M22189	0.7271
N.gonorrhoeae_MS11	N.meningitidis_M22160	0.7266
N.gonorrhoeae_MS11	N.meningitidis_M12752	0.7266
N.gonorrhoeae_MS11	N.meningitidis_M10208	0.7228
N.gonorrhoeae_MS11	N.meningitidis_M09293	0.7253
N.gonorrhoeae_MS11	N.meningitidis_M09261	0.7273
N.gonorrhoeae_MS11	N.meningitidis_M08001	0.7265
N.gonorrhoeae_MS11	N.meningitidis_M08000	0.7277
N.gonorrhoeae_MS11	N.meningitidis_M07999	0.7266
N.gonorrhoeae_MS11	N.meningitidis_M07165	0.7231
N.gonorrhoeae_MS11	N.meningitidis_M07162	0.7244
N.gonorrhoeae_MS11	N.meningitidis_M07161	0.7248
N.gonorrhoeae_MS11	N.meningitidis_M07149	0.727
N.gonorrhoeae_MS11	N.meningitidis_M0579	0.7325
N.gonorrhoeae_MS11	N.meningitidis_M04-240196	0.7253
N.gonorrhoeae_MS11	N.meningitidis_M01-240355	0.7253
N.gonorrhoeae_MS11	N.meningitidis_M01-240149	0.7287
N.gonorrhoeae_MS11	N.meningitidis_LNP21362	0.7275
N.gonorrhoeae_MS11	N.meningitidis_L91543	0.7256
N.gonorrhoeae_MS11	N.meningitidis_H44_76	0.728
N.gonorrhoeae_MS11	N.meningitidis_G2136	0.7299
N.gonorrhoeae_MS11	N.meningitidis_FDAARGOS_215	0.7217
N.gonorrhoeae_MS11	N.meningitidis_FDAARGOS_214	0.7263
N.gonorrhoeae_MS11	N.meningitidis_FDAARGOS_212	0.7364
N.gonorrhoeae_MS11	N.meningitidis_FDAARGOS_211	0.7192
N.gonorrhoeae_MS11	N.meningitidis_FDAARGOS_210	0.7259
N.gonorrhoeae_MS11	N.meningitidis_FDAARGOS_209	0.7208
N.gonorrhoeae_MS11	N.meningitidis_FAM18	0.7321
N.gonorrhoeae_MS11	N.meningitidis_DE8669	0.7248
N.gonorrhoeae_MS11	N.meningitidis_DE8555	0.7252
N.gonorrhoeae_MS11	N.meningitidis_DE10444	0.7362
N.gonorrhoeae_MS11	N.meningitidis_COL-201504-11	0.7296
N.gonorrhoeae_MS11	N.meningitidis_B6116_77	0.7255
N.gonorrhoeae_MS11	N.meningitidis_alpha710	0.7286
N.gonorrhoeae_MS11	N.meningitidis_alpha14	0.7261
N.gonorrhoeae_MS11	N.meningitidis_8013	0.7243
N.gonorrhoeae_MS11	N.meningitidis_510612	0.7256
N.gonorrhoeae_MS11	N.meningitidis_38277	0.7257
N.gonorrhoeae_MS11	N.meningitidis_331401	0.7276
N.gonorrhoeae_MS11	N.meningitidis_053442	0.7363
N.gonorrhoeae_MS11	N.gonorrhoeae_NCTC13800	0.9305
N.gonorrhoeae_MS11	N.gonorrhoeae_NCTC13799	0.9157
N.gonorrhoeae_MS11	N.gonorrhoeae_NCTC13798	0.9292
N.gonorrhoeae_MS11	N.gonorrhoeae_NCCP11945	0.934
N.gonorrhoeae_MS11	N.gonorrhoeae_MS11	0.0383
N.gonorrhoeae_NCCP11945	N.zoodegmatis_NCTC12230	0.5309
N.gonorrhoeae_NCCP11945	N.weaveri_NCTC13585	0.5799
N.gonorrhoeae_NCCP11945	N.mucosa_C102	0.6261
N.gonorrhoeae_NCCP11945	N.elongata_ATCC_29315	0.566
N.gonorrhoeae_NCCP11945	N.lactamica_Y92-1009	0.6981
N.gonorrhoeae_NCCP11945	N.lactamica_ATCC_23970	0.6934
N.gonorrhoeae_NCCP11945	N.lactamica_020-06	0.693
N.gonorrhoeae_NCCP11945	N.meningitidis_Z2491	0.7235
N.gonorrhoeae_NCCP11945	N.meningitidis_WUE_2594	0.731
N.gonorrhoeae_NCCP11945	N.meningitidis_WUE2121	0.7247
N.gonorrhoeae_NCCP11945	N.meningitidis_NZ-05_33	0.7259
N.gonorrhoeae_NCCP11945	N.meningitidis_NM3686	0.7315
N.gonorrhoeae_NCCP11945	N.meningitidis_NM3683	0.7262
N.gonorrhoeae_NCCP11945	N.meningitidis_NM3682	0.727
N.gonorrhoeae_NCCP11945	N.meningitidis_MC58	0.7261
N.gonorrhoeae_NCCP11945	N.meningitidis_M7124	0.7267
N.gonorrhoeae_NCCP11945	N.meningitidis_M27559	0.7252
N.gonorrhoeae_NCCP11945	N.meningitidis_M25476	0.7234
N.gonorrhoeae_NCCP11945	N.meningitidis_M25474	0.7249
N.gonorrhoeae_NCCP11945	N.meningitidis_M25472	0.7244
N.gonorrhoeae_NCCP11945	N.meningitidis_M25462	0.7256
N.gonorrhoeae_NCCP11945	N.meningitidis_M25459	0.726
N.gonorrhoeae_NCCP11945	N.meningitidis_M25456	0.7248
N.gonorrhoeae_NCCP11945	N.meningitidis_M25438	0.7283
N.gonorrhoeae_NCCP11945	N.meningitidis_M25419	0.7273
N.gonorrhoeae_NCCP11945	N.meningitidis_M25087	0.7258
N.gonorrhoeae_NCCP11945	N.meningitidis_M25074	0.7196
N.gonorrhoeae_NCCP11945	N.meningitidis_M25073	0.7228
N.gonorrhoeae_NCCP11945	N.meningitidis_M25070	0.7253
N.gonorrhoeae_NCCP11945	N.meningitidis_M24730	0.7271
N.gonorrhoeae_NCCP11945	N.meningitidis_M24705	0.7328
N.gonorrhoeae_NCCP11945	N.meningitidis_M23413	0.7263
N.gonorrhoeae_NCCP11945	N.meningitidis_M22828	0.731
N.gonorrhoeae_NCCP11945	N.meningitidis_M22822	0.7302
N.gonorrhoeae_NCCP11945	N.meningitidis_M22819	0.7333
N.gonorrhoeae_NCCP11945	N.meningitidis_M22811	0.7314
N.gonorrhoeae_NCCP11945	N.meningitidis_M22809	0.7303
N.gonorrhoeae_NCCP11945	N.meningitidis_M22804	0.7289
N.gonorrhoeae_NCCP11945	N.meningitidis_M22801	0.7253
N.gonorrhoeae_NCCP11945	N.meningitidis_M22797	0.7251
N.gonorrhoeae_NCCP11945	N.meningitidis_M22790	0.7225
N.gonorrhoeae_NCCP11945	N.meningitidis_M22783	0.7285
N.gonorrhoeae_NCCP11945	N.meningitidis_M22772	0.7269
N.gonorrhoeae_NCCP11945	N.meningitidis_M22769	0.7296
N.gonorrhoeae_NCCP11945	N.meningitidis_M22759	0.7308
N.gonorrhoeae_NCCP11945	N.meningitidis_M22748	0.7284
N.gonorrhoeae_NCCP11945	N.meningitidis_M22747	0.7262
N.gonorrhoeae_NCCP11945	N.meningitidis_M22745	0.7257
N.gonorrhoeae_NCCP11945	N.meningitidis_M22740	0.7253
N.gonorrhoeae_NCCP11945	N.meningitidis_M22722	0.7259
N.gonorrhoeae_NCCP11945	N.meningitidis_M22718	0.7269
N.gonorrhoeae_NCCP11945	N.meningitidis_M22191	0.7255
N.gonorrhoeae_NCCP11945	N.meningitidis_M22189	0.7263
N.gonorrhoeae_NCCP11945	N.meningitidis_M22160	0.7254
N.gonorrhoeae_NCCP11945	N.meningitidis_M12752	0.7258
N.gonorrhoeae_NCCP11945	N.meningitidis_M10208	0.722
N.gonorrhoeae_NCCP11945	N.meningitidis_M09293	0.7232
N.gonorrhoeae_NCCP11945	N.meningitidis_M09261	0.7235
N.gonorrhoeae_NCCP11945	N.meningitidis_M08001	0.7244
N.gonorrhoeae_NCCP11945	N.meningitidis_M08000	0.7265
N.gonorrhoeae_NCCP11945	N.meningitidis_M07999	0.7249
N.gonorrhoeae_NCCP11945	N.meningitidis_M07165	0.7214
N.gonorrhoeae_NCCP11945	N.meningitidis_M07162	0.7244
N.gonorrhoeae_NCCP11945	N.meningitidis_M07161	0.7231
N.gonorrhoeae_NCCP11945	N.meningitidis_M07149	0.725
N.gonorrhoeae_NCCP11945	N.meningitidis_M0579	0.7296
N.gonorrhoeae_NCCP11945	N.meningitidis_M04-240196	0.7274
N.gonorrhoeae_NCCP11945	N.meningitidis_M01-240355	0.7283
N.gonorrhoeae_NCCP11945	N.meningitidis_M01-240149	0.73
N.gonorrhoeae_NCCP11945	N.meningitidis_LNP21362	0.7241
N.gonorrhoeae_NCCP11945	N.meningitidis_L91543	0.7278
N.gonorrhoeae_NCCP11945	N.meningitidis_H44_76	0.7251
N.gonorrhoeae_NCCP11945	N.meningitidis_G2136	0.7299
N.gonorrhoeae_NCCP11945	N.meningitidis_FDAARGOS_215	0.7251
N.gonorrhoeae_NCCP11945	N.meningitidis_FDAARGOS_214	0.7247
N.gonorrhoeae_NCCP11945	N.meningitidis_FDAARGOS_212	0.7357
N.gonorrhoeae_NCCP11945	N.meningitidis_FDAARGOS_211	0.723
N.gonorrhoeae_NCCP11945	N.meningitidis_FDAARGOS_210	0.7221
N.gonorrhoeae_NCCP11945	N.meningitidis_FDAARGOS_209	0.7195
N.gonorrhoeae_NCCP11945	N.meningitidis_FAM18	0.7334
N.gonorrhoeae_NCCP11945	N.meningitidis_DE8669	0.7249
N.gonorrhoeae_NCCP11945	N.meningitidis_DE8555	0.7265
N.gonorrhoeae_NCCP11945	N.meningitidis_DE10444	0.7351
N.gonorrhoeae_NCCP11945	N.meningitidis_COL-201504-11	0.7322
N.gonorrhoeae_NCCP11945	N.meningitidis_B6116_77	0.7272
N.gonorrhoeae_NCCP11945	N.meningitidis_alpha710	0.7291
N.gonorrhoeae_NCCP11945	N.meningitidis_alpha14	0.7257
N.gonorrhoeae_NCCP11945	N.meningitidis_8013	0.7222
N.gonorrhoeae_NCCP11945	N.meningitidis_510612	0.7243
N.gonorrhoeae_NCCP11945	N.meningitidis_38277	0.7257
N.gonorrhoeae_NCCP11945	N.meningitidis_331401	0.7268
N.gonorrhoeae_NCCP11945	N.meningitidis_053442	0.7334
N.gonorrhoeae_NCCP11945	N.gonorrhoeae_NCTC13800	0.9586
N.gonorrhoeae_NCCP11945	N.gonorrhoeae_NCTC13799	0.9369
N.gonorrhoeae_NCCP11945	N.gonorrhoeae_NCTC13798	0.9544
N.gonorrhoeae_NCCP11945	N.gonorrhoeae_NCCP11945	0.0434
N.gonorrhoeae_NCTC13798	N.zoodegmatis_NCTC12230	0.5341
N.gonorrhoeae_NCTC13798	N.weaveri_NCTC13585	0.5849
N.gonorrhoeae_NCTC13798	N.mucosa_C102	0.6296
N.gonorrhoeae_NCTC13798	N.elongata_ATCC_29315	0.569
N.gonorrhoeae_NCTC13798	N.lactamica_Y92-1009	0.7031
N.gonorrhoeae_NCTC13798	N.lactamica_ATCC_23970	0.7001
N.gonorrhoeae_NCTC13798	N.lactamica_020-06	0.6975
N.gonorrhoeae_NCTC13798	N.meningitidis_Z2491	0.7295
N.gonorrhoeae_NCTC13798	N.meningitidis_WUE_2594	0.7365
N.gonorrhoeae_NCTC13798	N.meningitidis_WUE2121	0.7294
N.gonorrhoeae_NCTC13798	N.meningitidis_NZ-05_33	0.7314
N.gonorrhoeae_NCTC13798	N.meningitidis_NM3686	0.7353
N.gonorrhoeae_NCTC13798	N.meningitidis_NM3683	0.7325
N.gonorrhoeae_NCTC13798	N.meningitidis_NM3682	0.7334
N.gonorrhoeae_NCTC13798	N.meningitidis_MC58	0.7304
N.gonorrhoeae_NCTC13798	N.meningitidis_M7124	0.7323
N.gonorrhoeae_NCTC13798	N.meningitidis_M27559	0.7303
N.gonorrhoeae_NCTC13798	N.meningitidis_M25476	0.7293
N.gonorrhoeae_NCTC13798	N.meningitidis_M25474	0.7308
N.gonorrhoeae_NCTC13798	N.meningitidis_M25472	0.7295
N.gonorrhoeae_NCTC13798	N.meningitidis_M25462	0.7302
N.gonorrhoeae_NCTC13798	N.meningitidis_M25459	0.7307
N.gonorrhoeae_NCTC13798	N.meningitidis_M25456	0.7303
N.gonorrhoeae_NCTC13798	N.meningitidis_M25438	0.7338
N.gonorrhoeae_NCTC13798	N.meningitidis_M25419	0.7328
N.gonorrhoeae_NCTC13798	N.meningitidis_M25087	0.7301
N.gonorrhoeae_NCTC13798	N.meningitidis_M25074	0.7246
N.gonorrhoeae_NCTC13798	N.meningitidis_M25073	0.7279
N.gonorrhoeae_NCTC13798	N.meningitidis_M25070	0.7309
N.gonorrhoeae_NCTC13798	N.meningitidis_M24730	0.7318
N.gonorrhoeae_NCTC13798	N.meningitidis_M24705	0.7367
N.gonorrhoeae_NCTC13798	N.meningitidis_M23413	0.7318
N.gonorrhoeae_NCTC13798	N.meningitidis_M22828	0.7345
N.gonorrhoeae_NCTC13798	N.meningitidis_M22822	0.7346
N.gonorrhoeae_NCTC13798	N.meningitidis_M22819	0.7381
N.gonorrhoeae_NCTC13798	N.meningitidis_M22811	0.7358
N.gonorrhoeae_NCTC13798	N.meningitidis_M22809	0.7338
N.gonorrhoeae_NCTC13798	N.meningitidis_M22804	0.7319
N.gonorrhoeae_NCTC13798	N.meningitidis_M22801	0.7312
N.gonorrhoeae_NCTC13798	N.meningitidis_M22797	0.7306
N.gonorrhoeae_NCTC13798	N.meningitidis_M22790	0.7263
N.gonorrhoeae_NCTC13798	N.meningitidis_M22783	0.7332
N.gonorrhoeae_NCTC13798	N.meningitidis_M22772	0.7333
N.gonorrhoeae_NCTC13798	N.meningitidis_M22769	0.7347
N.gonorrhoeae_NCTC13798	N.meningitidis_M22759	0.7364
N.gonorrhoeae_NCTC13798	N.meningitidis_M22748	0.7335
N.gonorrhoeae_NCTC13798	N.meningitidis_M22747	0.7305
N.gonorrhoeae_NCTC13798	N.meningitidis_M22745	0.7325
N.gonorrhoeae_NCTC13798	N.meningitidis_M22740	0.7313
N.gonorrhoeae_NCTC13798	N.meningitidis_M22722	0.7318
N.gonorrhoeae_NCTC13798	N.meningitidis_M22718	0.732
N.gonorrhoeae_NCTC13798	N.meningitidis_M22191	0.7324
N.gonorrhoeae_NCTC13798	N.meningitidis_M22189	0.7323
N.gonorrhoeae_NCTC13798	N.meningitidis_M22160	0.7313
N.gonorrhoeae_NCTC13798	N.meningitidis_M12752	0.7313
N.gonorrhoeae_NCTC13798	N.meningitidis_M10208	0.727
N.gonorrhoeae_NCTC13798	N.meningitidis_M09293	0.7304
N.gonorrhoeae_NCTC13798	N.meningitidis_M09261	0.7303
N.gonorrhoeae_NCTC13798	N.meningitidis_M08001	0.7312
N.gonorrhoeae_NCTC13798	N.meningitidis_M08000	0.732
N.gonorrhoeae_NCTC13798	N.meningitidis_M07999	0.7313
N.gonorrhoeae_NCTC13798	N.meningitidis_M07165	0.7277
N.gonorrhoeae_NCTC13798	N.meningitidis_M07162	0.7295
N.gonorrhoeae_NCTC13798	N.meningitidis_M07161	0.7286
N.gonorrhoeae_NCTC13798	N.meningitidis_M07149	0.7305
N.gonorrhoeae_NCTC13798	N.meningitidis_M0579	0.7339
N.gonorrhoeae_NCTC13798	N.meningitidis_M04-240196	0.7321
N.gonorrhoeae_NCTC13798	N.meningitidis_M01-240355	0.7342
N.gonorrhoeae_NCTC13798	N.meningitidis_M01-240149	0.7352
N.gonorrhoeae_NCTC13798	N.meningitidis_LNP21362	0.7301
N.gonorrhoeae_NCTC13798	N.meningitidis_L91543	0.7329
N.gonorrhoeae_NCTC13798	N.meningitidis_H44_76	0.7328
N.gonorrhoeae_NCTC13798	N.meningitidis_G2136	0.7355
N.gonorrhoeae_NCTC13798	N.meningitidis_FDAARGOS_215	0.7276
N.gonorrhoeae_NCTC13798	N.meningitidis_FDAARGOS_214	0.7292
N.gonorrhoeae_NCTC13798	N.meningitidis_FDAARGOS_212	0.7416
N.gonorrhoeae_NCTC13798	N.meningitidis_FDAARGOS_211	0.7255
N.gonorrhoeae_NCTC13798	N.meningitidis_FDAARGOS_210	0.7281
N.gonorrhoeae_NCTC13798	N.meningitidis_FDAARGOS_209	0.7246
N.gonorrhoeae_NCTC13798	N.meningitidis_FAM18	0.7395
N.gonorrhoeae_NCTC13798	N.meningitidis_DE8669	0.73
N.gonorrhoeae_NCTC13798	N.meningitidis_DE8555	0.7303
N.gonorrhoeae_NCTC13798	N.meningitidis_DE10444	0.743
N.gonorrhoeae_NCTC13798	N.meningitidis_COL-201504-11	0.7382
N.gonorrhoeae_NCTC13798	N.meningitidis_B6116_77	0.7323
N.gonorrhoeae_NCTC13798	N.meningitidis_alpha710	0.7334
N.gonorrhoeae_NCTC13798	N.meningitidis_alpha14	0.7313
N.gonorrhoeae_NCTC13798	N.meningitidis_8013	0.7294
N.gonorrhoeae_NCTC13798	N.meningitidis_510612	0.7307
N.gonorrhoeae_NCTC13798	N.meningitidis_38277	0.7317
N.gonorrhoeae_NCTC13798	N.meningitidis_331401	0.7328
N.gonorrhoeae_NCTC13798	N.meningitidis_053442	0.739
N.gonorrhoeae_NCTC13798	N.gonorrhoeae_NCTC13800	0.9788
N.gonorrhoeae_NCTC13798	N.gonorrhoeae_NCTC13799	0.9315
N.gonorrhoeae_NCTC13798	N.gonorrhoeae_NCTC13798	0.0421
N.gonorrhoeae_NCTC13799	N.zoodegmatis_NCTC12230	0.5419
N.gonorrhoeae_NCTC13799	N.weaveri_NCTC13585	0.5935
N.gonorrhoeae_NCTC13799	N.mucosa_C102	0.6399
N.gonorrhoeae_NCTC13799	N.elongata_ATCC_29315	0.5776
N.gonorrhoeae_NCTC13799	N.lactamica_Y92-1009	0.7128
N.gonorrhoeae_NCTC13799	N.lactamica_ATCC_23970	0.7079
N.gonorrhoeae_NCTC13799	N.lactamica_020-06	0.7056
N.gonorrhoeae_NCTC13799	N.meningitidis_Z2491	0.7413
N.gonorrhoeae_NCTC13799	N.meningitidis_WUE_2594	0.7507
N.gonorrhoeae_NCTC13799	N.meningitidis_WUE2121	0.743
N.gonorrhoeae_NCTC13799	N.meningitidis_NZ-05_33	0.7449
N.gonorrhoeae_NCTC13799	N.meningitidis_NM3686	0.7475
N.gonorrhoeae_NCTC13799	N.meningitidis_NM3683	0.7443
N.gonorrhoeae_NCTC13799	N.meningitidis_NM3682	0.7455
N.gonorrhoeae_NCTC13799	N.meningitidis_MC58	0.739
N.gonorrhoeae_NCTC13799	N.meningitidis_M7124	0.7427
N.gonorrhoeae_NCTC13799	N.meningitidis_M27559	0.7423
N.gonorrhoeae_NCTC13799	N.meningitidis_M25476	0.7404
N.gonorrhoeae_NCTC13799	N.meningitidis_M25474	0.7429
N.gonorrhoeae_NCTC13799	N.meningitidis_M25472	0.741
N.gonorrhoeae_NCTC13799	N.meningitidis_M25462	0.7422
N.gonorrhoeae_NCTC13799	N.meningitidis_M25459	0.7427
N.gonorrhoeae_NCTC13799	N.meningitidis_M25456	0.7403
N.gonorrhoeae_NCTC13799	N.meningitidis_M25438	0.7439
N.gonorrhoeae_NCTC13799	N.meningitidis_M25419	0.7442
N.gonorrhoeae_NCTC13799	N.meningitidis_M25087	0.7418
N.gonorrhoeae_NCTC13799	N.meningitidis_M25074	0.7364
N.gonorrhoeae_NCTC13799	N.meningitidis_M25073	0.7402
N.gonorrhoeae_NCTC13799	N.meningitidis_M25070	0.7399
N.gonorrhoeae_NCTC13799	N.meningitidis_M24730	0.7451
N.gonorrhoeae_NCTC13799	N.meningitidis_M24705	0.7456
N.gonorrhoeae_NCTC13799	N.meningitidis_M23413	0.7421
N.gonorrhoeae_NCTC13799	N.meningitidis_M22828	0.7443
N.gonorrhoeae_NCTC13799	N.meningitidis_M22822	0.7434
N.gonorrhoeae_NCTC13799	N.meningitidis_M22819	0.7474
N.gonorrhoeae_NCTC13799	N.meningitidis_M22811	0.7438
N.gonorrhoeae_NCTC13799	N.meningitidis_M22809	0.7439
N.gonorrhoeae_NCTC13799	N.meningitidis_M22804	0.7411
N.gonorrhoeae_NCTC13799	N.meningitidis_M22801	0.7416
N.gonorrhoeae_NCTC13799	N.meningitidis_M22797	0.7414
N.gonorrhoeae_NCTC13799	N.meningitidis_M22790	0.7357
N.gonorrhoeae_NCTC13799	N.meningitidis_M22783	0.7416
N.gonorrhoeae_NCTC13799	N.meningitidis_M22772	0.7437
N.gonorrhoeae_NCTC13799	N.meningitidis_M22769	0.7465
N.gonorrhoeae_NCTC13799	N.meningitidis_M22759	0.7465
N.gonorrhoeae_NCTC13799	N.meningitidis_M22748	0.7451
N.gonorrhoeae_NCTC13799	N.meningitidis_M22747	0.7416
N.gonorrhoeae_NCTC13799	N.meningitidis_M22745	0.7425
N.gonorrhoeae_NCTC13799	N.meningitidis_M22740	0.7433
N.gonorrhoeae_NCTC13799	N.meningitidis_M22722	0.7426
N.gonorrhoeae_NCTC13799	N.meningitidis_M22718	0.7425
N.gonorrhoeae_NCTC13799	N.meningitidis_M22191	0.744
N.gonorrhoeae_NCTC13799	N.meningitidis_M22189	0.7427
N.gonorrhoeae_NCTC13799	N.meningitidis_M22160	0.7412
N.gonorrhoeae_NCTC13799	N.meningitidis_M12752	0.7399
N.gonorrhoeae_NCTC13799	N.meningitidis_M10208	0.7368
N.gonorrhoeae_NCTC13799	N.meningitidis_M09293	0.7407
N.gonorrhoeae_NCTC13799	N.meningitidis_M09261	0.7411
N.gonorrhoeae_NCTC13799	N.meningitidis_M08001	0.742
N.gonorrhoeae_NCTC13799	N.meningitidis_M08000	0.7416
N.gonorrhoeae_NCTC13799	N.meningitidis_M07999	0.7425
N.gonorrhoeae_NCTC13799	N.meningitidis_M07165	0.7397
N.gonorrhoeae_NCTC13799	N.meningitidis_M07162	0.7394
N.gonorrhoeae_NCTC13799	N.meningitidis_M07161	0.7388
N.gonorrhoeae_NCTC13799	N.meningitidis_M07149	0.742
N.gonorrhoeae_NCTC13799	N.meningitidis_M0579	0.7449
N.gonorrhoeae_NCTC13799	N.meningitidis_M04-240196	0.7413
N.gonorrhoeae_NCTC13799	N.meningitidis_M01-240355	0.7424
N.gonorrhoeae_NCTC13799	N.meningitidis_M01-240149	0.7475
N.gonorrhoeae_NCTC13799	N.meningitidis_LNP21362	0.7385
N.gonorrhoeae_NCTC13799	N.meningitidis_L91543	0.7441
N.gonorrhoeae_NCTC13799	N.meningitidis_H44_76	0.7398
N.gonorrhoeae_NCTC13799	N.meningitidis_G2136	0.7439
N.gonorrhoeae_NCTC13799	N.meningitidis_FDAARGOS_215	0.7383
N.gonorrhoeae_NCTC13799	N.meningitidis_FDAARGOS_214	0.7224
N.gonorrhoeae_NCTC13799	N.meningitidis_FDAARGOS_212	0.7337
N.gonorrhoeae_NCTC13799	N.meningitidis_FDAARGOS_211	0.7363
N.gonorrhoeae_NCTC13799	N.meningitidis_FDAARGOS_210	0.7362
N.gonorrhoeae_NCTC13799	N.meningitidis_FDAARGOS_209	0.735
N.gonorrhoeae_NCTC13799	N.meningitidis_FAM18	0.7514
N.gonorrhoeae_NCTC13799	N.meningitidis_DE8669	0.7414
N.gonorrhoeae_NCTC13799	N.meningitidis_DE8555	0.7436
N.gonorrhoeae_NCTC13799	N.meningitidis_DE10444	0.7521
N.gonorrhoeae_NCTC13799	N.meningitidis_COL-201504-11	0.7484
N.gonorrhoeae_NCTC13799	N.meningitidis_B6116_77	0.741
N.gonorrhoeae_NCTC13799	N.meningitidis_alpha710	0.7469
N.gonorrhoeae_NCTC13799	N.meningitidis_alpha14	0.7432
N.gonorrhoeae_NCTC13799	N.meningitidis_8013	0.7362
N.gonorrhoeae_NCTC13799	N.meningitidis_510612	0.742
N.gonorrhoeae_NCTC13799	N.meningitidis_38277	0.7415
N.gonorrhoeae_NCTC13799	N.meningitidis_331401	0.7437
N.gonorrhoeae_NCTC13799	N.meningitidis_053442	0.751
N.gonorrhoeae_NCTC13799	N.gonorrhoeae_NCTC13800	0.9362
N.gonorrhoeae_NCTC13799	N.gonorrhoeae_NCTC13799	0.0403
N.gonorrhoeae_NCTC13800	N.zoodegmatis_NCTC12230	0.5333
N.gonorrhoeae_NCTC13800	N.weaveri_NCTC13585	0.5837
N.gonorrhoeae_NCTC13800	N.mucosa_C102	0.6283
N.gonorrhoeae_NCTC13800	N.elongata_ATCC_29315	0.5677
N.gonorrhoeae_NCTC13800	N.lactamica_Y92-1009	0.7031
N.gonorrhoeae_NCTC13800	N.lactamica_ATCC_23970	0.7
N.gonorrhoeae_NCTC13800	N.lactamica_020-06	0.6973
N.gonorrhoeae_NCTC13800	N.meningitidis_Z2491	0.7298
N.gonorrhoeae_NCTC13800	N.meningitidis_WUE_2594	0.7368
N.gonorrhoeae_NCTC13800	N.meningitidis_WUE2121	0.7292
N.gonorrhoeae_NCTC13800	N.meningitidis_NZ-05_33	0.7308
N.gonorrhoeae_NCTC13800	N.meningitidis_NM3686	0.7343
N.gonorrhoeae_NCTC13800	N.meningitidis_NM3683	0.732
N.gonorrhoeae_NCTC13800	N.meningitidis_NM3682	0.7332
N.gonorrhoeae_NCTC13800	N.meningitidis_MC58	0.7315
N.gonorrhoeae_NCTC13800	N.meningitidis_M7124	0.7322
N.gonorrhoeae_NCTC13800	N.meningitidis_M27559	0.731
N.gonorrhoeae_NCTC13800	N.meningitidis_M25476	0.7291
N.gonorrhoeae_NCTC13800	N.meningitidis_M25474	0.7306
N.gonorrhoeae_NCTC13800	N.meningitidis_M25472	0.7297
N.gonorrhoeae_NCTC13800	N.meningitidis_M25462	0.7309
N.gonorrhoeae_NCTC13800	N.meningitidis_M25459	0.7313
N.gonorrhoeae_NCTC13800	N.meningitidis_M25456	0.729
N.gonorrhoeae_NCTC13800	N.meningitidis_M25438	0.7338
N.gonorrhoeae_NCTC13800	N.meningitidis_M25419	0.731
N.gonorrhoeae_NCTC13800	N.meningitidis_M25087	0.7313
N.gonorrhoeae_NCTC13800	N.meningitidis_M25074	0.7236
N.gonorrhoeae_NCTC13800	N.meningitidis_M25073	0.7272
N.gonorrhoeae_NCTC13800	N.meningitidis_M25070	0.7302
N.gonorrhoeae_NCTC13800	N.meningitidis_M24730	0.732
N.gonorrhoeae_NCTC13800	N.meningitidis_M24705	0.737
N.gonorrhoeae_NCTC13800	N.meningitidis_M23413	0.7325
N.gonorrhoeae_NCTC13800	N.meningitidis_M22828	0.7349
N.gonorrhoeae_NCTC13800	N.meningitidis_M22822	0.7345
N.gonorrhoeae_NCTC13800	N.meningitidis_M22819	0.7374
N.gonorrhoeae_NCTC13800	N.meningitidis_M22811	0.7339
N.gonorrhoeae_NCTC13800	N.meningitidis_M22809	0.7349
N.gonorrhoeae_NCTC13800	N.meningitidis_M22804	0.7335
N.gonorrhoeae_NCTC13800	N.meningitidis_M22801	0.7316
N.gonorrhoeae_NCTC13800	N.meningitidis_M22797	0.7309
N.gonorrhoeae_NCTC13800	N.meningitidis_M22790	0.727
N.gonorrhoeae_NCTC13800	N.meningitidis_M22783	0.7326
N.gonorrhoeae_NCTC13800	N.meningitidis_M22772	0.7336
N.gonorrhoeae_NCTC13800	N.meningitidis_M22769	0.7351
N.gonorrhoeae_NCTC13800	N.meningitidis_M22759	0.7355
N.gonorrhoeae_NCTC13800	N.meningitidis_M22748	0.7346
N.gonorrhoeae_NCTC13800	N.meningitidis_M22747	0.7311
N.gonorrhoeae_NCTC13800	N.meningitidis_M22745	0.732
N.gonorrhoeae_NCTC13800	N.meningitidis_M22740	0.7319
N.gonorrhoeae_NCTC13800	N.meningitidis_M22722	0.7321
N.gonorrhoeae_NCTC13800	N.meningitidis_M22718	0.7319
N.gonorrhoeae_NCTC13800	N.meningitidis_M22191	0.7322
N.gonorrhoeae_NCTC13800	N.meningitidis_M22189	0.7317
N.gonorrhoeae_NCTC13800	N.meningitidis_M22160	0.7307
N.gonorrhoeae_NCTC13800	N.meningitidis_M12752	0.7298
N.gonorrhoeae_NCTC13800	N.meningitidis_M10208	0.7265
N.gonorrhoeae_NCTC13800	N.meningitidis_M09293	0.7299
N.gonorrhoeae_NCTC13800	N.meningitidis_M09261	0.7302
N.gonorrhoeae_NCTC13800	N.meningitidis_M08001	0.7311
N.gonorrhoeae_NCTC13800	N.meningitidis_M08000	0.7315
N.gonorrhoeae_NCTC13800	N.meningitidis_M07999	0.7319
N.gonorrhoeae_NCTC13800	N.meningitidis_M07165	0.728
N.gonorrhoeae_NCTC13800	N.meningitidis_M07162	0.7285
N.gonorrhoeae_NCTC13800	N.meningitidis_M07161	0.7288
N.gonorrhoeae_NCTC13800	N.meningitidis_M07149	0.7311
N.gonorrhoeae_NCTC13800	N.meningitidis_M0579	0.7347
N.gonorrhoeae_NCTC13800	N.meningitidis_M04-240196	0.7303
N.gonorrhoeae_NCTC13800	N.meningitidis_M01-240355	0.7332
N.gonorrhoeae_NCTC13800	N.meningitidis_M01-240149	0.7342
N.gonorrhoeae_NCTC13800	N.meningitidis_LNP21362	0.7309
N.gonorrhoeae_NCTC13800	N.meningitidis_L91543	0.7319
N.gonorrhoeae_NCTC13800	N.meningitidis_H44_76	0.7314
N.gonorrhoeae_NCTC13800	N.meningitidis_G2136	0.7337
N.gonorrhoeae_NCTC13800	N.meningitidis_FDAARGOS_215	0.7292
N.gonorrhoeae_NCTC13800	N.meningitidis_FDAARGOS_214	0.7298
N.gonorrhoeae_NCTC13800	N.meningitidis_FDAARGOS_212	0.7416
N.gonorrhoeae_NCTC13800	N.meningitidis_FDAARGOS_211	0.7267
N.gonorrhoeae_NCTC13800	N.meningitidis_FDAARGOS_210	0.7292
N.gonorrhoeae_NCTC13800	N.meningitidis_FDAARGOS_209	0.7254
N.gonorrhoeae_NCTC13800	N.meningitidis_FAM18	0.738
N.gonorrhoeae_NCTC13800	N.meningitidis_DE8669	0.7295
N.gonorrhoeae_NCTC13800	N.meningitidis_DE8555	0.7305
N.gonorrhoeae_NCTC13800	N.meningitidis_DE10444	0.7416
N.gonorrhoeae_NCTC13800	N.meningitidis_COL-201504-11	0.7356
N.gonorrhoeae_NCTC13800	N.meningitidis_B6116_77	0.7327
N.gonorrhoeae_NCTC13800	N.meningitidis_alpha710	0.7341
N.gonorrhoeae_NCTC13800	N.meningitidis_alpha14	0.7302
N.gonorrhoeae_NCTC13800	N.meningitidis_8013	0.7266
N.gonorrhoeae_NCTC13800	N.meningitidis_510612	0.731
N.gonorrhoeae_NCTC13800	N.meningitidis_38277	0.7306
N.gonorrhoeae_NCTC13800	N.meningitidis_331401	0.7335
N.gonorrhoeae_NCTC13800	N.meningitidis_053442	0.7406
N.gonorrhoeae_NCTC13800	N.gonorrhoeae_NCTC13800	0.0424
N.meningitidis_053442	N.zoodegmatis_NCTC12230	0.5594
N.meningitidis_053442	N.weaveri_NCTC13585	0.6139
N.meningitidis_053442	N.mucosa_C102	0.6549
N.meningitidis_053442	N.elongata_ATCC_29315	0.5843
N.meningitidis_053442	N.lactamica_Y92-1009	0.7226
N.meningitidis_053442	N.lactamica_ATCC_23970	0.7195
N.meningitidis_053442	N.lactamica_020-06	0.7186
N.meningitidis_053442	N.meningitidis_Z2491	0.8573
N.meningitidis_053442	N.meningitidis_WUE_2594	0.8477
N.meningitidis_053442	N.meningitidis_WUE2121	0.8419
N.meningitidis_053442	N.meningitidis_NZ-05_33	0.8581
N.meningitidis_053442	N.meningitidis_NM3686	0.8423
N.meningitidis_053442	N.meningitidis_NM3683	0.845
N.meningitidis_053442	N.meningitidis_NM3682	0.8448
N.meningitidis_053442	N.meningitidis_MC58	0.8487
N.meningitidis_053442	N.meningitidis_M7124	0.8463
N.meningitidis_053442	N.meningitidis_M27559	0.8447
N.meningitidis_053442	N.meningitidis_M25476	0.8426
N.meningitidis_053442	N.meningitidis_M25474	0.8481
N.meningitidis_053442	N.meningitidis_M25472	0.8452
N.meningitidis_053442	N.meningitidis_M25462	0.8449
N.meningitidis_053442	N.meningitidis_M25459	0.8458
N.meningitidis_053442	N.meningitidis_M25456	0.843
N.meningitidis_053442	N.meningitidis_M25438	0.8444
N.meningitidis_053442	N.meningitidis_M25419	0.8429
N.meningitidis_053442	N.meningitidis_M25087	0.8464
N.meningitidis_053442	N.meningitidis_M25074	0.8417
N.meningitidis_053442	N.meningitidis_M25073	0.8431
N.meningitidis_053442	N.meningitidis_M25070	0.8448
N.meningitidis_053442	N.meningitidis_M24730	0.8472
N.meningitidis_053442	N.meningitidis_M24705	0.8624
N.meningitidis_053442	N.meningitidis_M23413	0.8466
N.meningitidis_053442	N.meningitidis_M22828	0.8622
N.meningitidis_053442	N.meningitidis_M22822	0.8631
N.meningitidis_053442	N.meningitidis_M22819	0.8637
N.meningitidis_053442	N.meningitidis_M22811	0.8626
N.meningitidis_053442	N.meningitidis_M22809	0.8642
N.meningitidis_053442	N.meningitidis_M22804	0.8624
N.meningitidis_053442	N.meningitidis_M22801	0.8459
N.meningitidis_053442	N.meningitidis_M22797	0.8461
N.meningitidis_053442	N.meningitidis_M22790	0.8491
N.meningitidis_053442	N.meningitidis_M22783	0.8642
N.meningitidis_053442	N.meningitidis_M22772	0.8448
N.meningitidis_053442	N.meningitidis_M22769	0.8472
N.meningitidis_053442	N.meningitidis_M22759	0.8523
N.meningitidis_053442	N.meningitidis_M22748	0.8468
N.meningitidis_053442	N.meningitidis_M22747	0.8451
N.meningitidis_053442	N.meningitidis_M22745	0.8455
N.meningitidis_053442	N.meningitidis_M22740	0.8457
N.meningitidis_053442	N.meningitidis_M22722	0.8449
N.meningitidis_053442	N.meningitidis_M22718	0.8466
N.meningitidis_053442	N.meningitidis_M22191	0.8501
N.meningitidis_053442	N.meningitidis_M22189	0.8445
N.meningitidis_053442	N.meningitidis_M22160	0.8437
N.meningitidis_053442	N.meningitidis_M12752	0.8443
N.meningitidis_053442	N.meningitidis_M10208	0.8395
N.meningitidis_053442	N.meningitidis_M09293	0.8446
N.meningitidis_053442	N.meningitidis_M09261	0.8458
N.meningitidis_053442	N.meningitidis_M08001	0.8439
N.meningitidis_053442	N.meningitidis_M08000	0.8461
N.meningitidis_053442	N.meningitidis_M07999	0.8448
N.meningitidis_053442	N.meningitidis_M07165	0.8418
N.meningitidis_053442	N.meningitidis_M07162	0.8442
N.meningitidis_053442	N.meningitidis_M07161	0.8443
N.meningitidis_053442	N.meningitidis_M07149	0.8442
N.meningitidis_053442	N.meningitidis_M0579	0.8601
N.meningitidis_053442	N.meningitidis_M04-240196	0.8514
N.meningitidis_053442	N.meningitidis_M01-240355	0.8418
N.meningitidis_053442	N.meningitidis_M01-240149	0.8608
N.meningitidis_053442	N.meningitidis_LNP21362	0.8448
N.meningitidis_053442	N.meningitidis_L91543	0.8502
N.meningitidis_053442	N.meningitidis_H44_76	0.8464
N.meningitidis_053442	N.meningitidis_G2136	0.8529
N.meningitidis_053442	N.meningitidis_FDAARGOS_215	0.8413
N.meningitidis_053442	N.meningitidis_FDAARGOS_214	0.8252
N.meningitidis_053442	N.meningitidis_FDAARGOS_212	0.8369
N.meningitidis_053442	N.meningitidis_FDAARGOS_211	0.8415
N.meningitidis_053442	N.meningitidis_FDAARGOS_210	0.8439
N.meningitidis_053442	N.meningitidis_FDAARGOS_209	0.8437
N.meningitidis_053442	N.meningitidis_FAM18	0.8454
N.meningitidis_053442	N.meningitidis_DE8669	0.8534
N.meningitidis_053442	N.meningitidis_DE8555	0.8437
N.meningitidis_053442	N.meningitidis_DE10444	0.8622
N.meningitidis_053442	N.meningitidis_COL-201504-11	0.8479
N.meningitidis_053442	N.meningitidis_B6116_77	0.8518
N.meningitidis_053442	N.meningitidis_alpha710	0.8528
N.meningitidis_053442	N.meningitidis_alpha14	0.8348
N.meningitidis_053442	N.meningitidis_8013	0.8424
N.meningitidis_053442	N.meningitidis_510612	0.8593
N.meningitidis_053442	N.meningitidis_38277	0.8395
N.meningitidis_053442	N.meningitidis_331401	0.862
N.meningitidis_053442	N.meningitidis_053442	0.034
N.meningitidis_331401	N.zoodegmatis_NCTC12230	0.5584
N.meningitidis_331401	N.weaveri_NCTC13585	0.6077
N.meningitidis_331401	N.mucosa_C102	0.6453
N.meningitidis_331401	N.elongata_ATCC_29315	0.5786
N.meningitidis_331401	N.lactamica_Y92-1009	0.7102
N.meningitidis_331401	N.lactamica_ATCC_23970	0.7134
N.meningitidis_331401	N.lactamica_020-06	0.7061
N.meningitidis_331401	N.meningitidis_Z2491	0.9328
N.meningitidis_331401	N.meningitidis_WUE_2594	0.9462
N.meningitidis_331401	N.meningitidis_WUE2121	0.8276
N.meningitidis_331401	N.meningitidis_NZ-05_33	0.8359
N.meningitidis_331401	N.meningitidis_NM3686	0.8393
N.meningitidis_331401	N.meningitidis_NM3683	0.8367
N.meningitidis_331401	N.meningitidis_NM3682	0.8326
N.meningitidis_331401	N.meningitidis_MC58	0.8443
N.meningitidis_331401	N.meningitidis_M7124	0.8336
N.meningitidis_331401	N.meningitidis_M27559	0.8321
N.meningitidis_331401	N.meningitidis_M25476	0.8296
N.meningitidis_331401	N.meningitidis_M25474	0.8341
N.meningitidis_331401	N.meningitidis_M25472	0.8334
N.meningitidis_331401	N.meningitidis_M25462	0.8319
N.meningitidis_331401	N.meningitidis_M25459	0.8345
N.meningitidis_331401	N.meningitidis_M25456	0.8321
N.meningitidis_331401	N.meningitidis_M25438	0.8352
N.meningitidis_331401	N.meningitidis_M25419	0.839
N.meningitidis_331401	N.meningitidis_M25087	0.8337
N.meningitidis_331401	N.meningitidis_M25074	0.8279
N.meningitidis_331401	N.meningitidis_M25073	0.8279
N.meningitidis_331401	N.meningitidis_M25070	0.8313
N.meningitidis_331401	N.meningitidis_M24730	0.8319
N.meningitidis_331401	N.meningitidis_M24705	0.8635
N.meningitidis_331401	N.meningitidis_M23413	0.8318
N.meningitidis_331401	N.meningitidis_M22828	0.8637
N.meningitidis_331401	N.meningitidis_M22822	0.8606
N.meningitidis_331401	N.meningitidis_M22819	0.864
N.meningitidis_331401	N.meningitidis_M22811	0.8592
N.meningitidis_331401	N.meningitidis_M22809	0.8627
N.meningitidis_331401	N.meningitidis_M22804	0.8604
N.meningitidis_331401	N.meningitidis_M22801	0.8337
N.meningitidis_331401	N.meningitidis_M22797	0.8343
N.meningitidis_331401	N.meningitidis_M22790	0.8536
N.meningitidis_331401	N.meningitidis_M22783	0.859
N.meningitidis_331401	N.meningitidis_M22772	0.833
N.meningitidis_331401	N.meningitidis_M22769	0.8375
N.meningitidis_331401	N.meningitidis_M22759	0.8403
N.meningitidis_331401	N.meningitidis_M22748	0.8368
N.meningitidis_331401	N.meningitidis_M22747	0.8312
N.meningitidis_331401	N.meningitidis_M22745	0.8354
N.meningitidis_331401	N.meningitidis_M22740	0.8348
N.meningitidis_331401	N.meningitidis_M22722	0.8314
N.meningitidis_331401	N.meningitidis_M22718	0.8338
N.meningitidis_331401	N.meningitidis_M22191	0.8404
N.meningitidis_331401	N.meningitidis_M22189	0.8353
N.meningitidis_331401	N.meningitidis_M22160	0.8346
N.meningitidis_331401	N.meningitidis_M12752	0.8317
N.meningitidis_331401	N.meningitidis_M10208	0.83
N.meningitidis_331401	N.meningitidis_M09293	0.8376
N.meningitidis_331401	N.meningitidis_M09261	0.8344
N.meningitidis_331401	N.meningitidis_M08001	0.8356
N.meningitidis_331401	N.meningitidis_M08000	0.8334
N.meningitidis_331401	N.meningitidis_M07999	0.8348
N.meningitidis_331401	N.meningitidis_M07165	0.8318
N.meningitidis_331401	N.meningitidis_M07162	0.8316
N.meningitidis_331401	N.meningitidis_M07161	0.8322
N.meningitidis_331401	N.meningitidis_M07149	0.8307
N.meningitidis_331401	N.meningitidis_M0579	0.8444
N.meningitidis_331401	N.meningitidis_M04-240196	0.8425
N.meningitidis_331401	N.meningitidis_M01-240355	0.8363
N.meningitidis_331401	N.meningitidis_M01-240149	0.838
N.meningitidis_331401	N.meningitidis_LNP21362	0.8394
N.meningitidis_331401	N.meningitidis_L91543	0.8383
N.meningitidis_331401	N.meningitidis_H44_76	0.8463
N.meningitidis_331401	N.meningitidis_G2136	0.8462
N.meningitidis_331401	N.meningitidis_FDAARGOS_215	0.83
N.meningitidis_331401	N.meningitidis_FDAARGOS_214	0.8141
N.meningitidis_331401	N.meningitidis_FDAARGOS_212	0.8305
N.meningitidis_331401	N.meningitidis_FDAARGOS_211	0.8324
N.meningitidis_331401	N.meningitidis_FDAARGOS_210	0.8431
N.meningitidis_331401	N.meningitidis_FDAARGOS_209	0.9309
N.meningitidis_331401	N.meningitidis_FAM18	0.8365
N.meningitidis_331401	N.meningitidis_DE8669	0.8378
N.meningitidis_331401	N.meningitidis_DE8555	0.8268
N.meningitidis_331401	N.meningitidis_DE10444	0.8682
N.meningitidis_331401	N.meningitidis_COL-201504-11	0.8373
N.meningitidis_331401	N.meningitidis_B6116_77	0.8403
N.meningitidis_331401	N.meningitidis_alpha710	0.8338
N.meningitidis_331401	N.meningitidis_alpha14	0.8278
N.meningitidis_331401	N.meningitidis_8013	0.8368
N.meningitidis_331401	N.meningitidis_510612	0.9723
N.meningitidis_331401	N.meningitidis_38277	0.8261
N.meningitidis_331401	N.meningitidis_331401	0.0286
N.meningitidis_38277	N.zoodegmatis_NCTC12230	0.5561
N.meningitidis_38277	N.weaveri_NCTC13585	0.6012
N.meningitidis_38277	N.mucosa_C102	0.6423
N.meningitidis_38277	N.elongata_ATCC_29315	0.5746
N.meningitidis_38277	N.lactamica_Y92-1009	0.718
N.meningitidis_38277	N.lactamica_ATCC_23970	0.7123
N.meningitidis_38277	N.lactamica_020-06	0.7081
N.meningitidis_38277	N.meningitidis_Z2491	0.8319
N.meningitidis_38277	N.meningitidis_WUE_2594	0.8153
N.meningitidis_38277	N.meningitidis_WUE2121	0.8284
N.meningitidis_38277	N.meningitidis_NZ-05_33	0.9004
N.meningitidis_38277	N.meningitidis_NM3686	0.8378
N.meningitidis_38277	N.meningitidis_NM3683	0.8315
N.meningitidis_38277	N.meningitidis_NM3682	0.8351
N.meningitidis_38277	N.meningitidis_MC58	0.8519
N.meningitidis_38277	N.meningitidis_M7124	0.8357
N.meningitidis_38277	N.meningitidis_M27559	0.8355
N.meningitidis_38277	N.meningitidis_M25476	0.8326
N.meningitidis_38277	N.meningitidis_M25474	0.837
N.meningitidis_38277	N.meningitidis_M25472	0.8342
N.meningitidis_38277	N.meningitidis_M25462	0.8344
N.meningitidis_38277	N.meningitidis_M25459	0.834
N.meningitidis_38277	N.meningitidis_M25456	0.8334
N.meningitidis_38277	N.meningitidis_M25438	0.8365
N.meningitidis_38277	N.meningitidis_M25419	0.8372
N.meningitidis_38277	N.meningitidis_M25087	0.832
N.meningitidis_38277	N.meningitidis_M25074	0.8318
N.meningitidis_38277	N.meningitidis_M25073	0.8326
N.meningitidis_38277	N.meningitidis_M25070	0.8317
N.meningitidis_38277	N.meningitidis_M24730	0.8358
N.meningitidis_38277	N.meningitidis_M24705	0.8399
N.meningitidis_38277	N.meningitidis_M23413	0.8352
N.meningitidis_38277	N.meningitidis_M22828	0.8343
N.meningitidis_38277	N.meningitidis_M22822	0.8353
N.meningitidis_38277	N.meningitidis_M22819	0.8397
N.meningitidis_38277	N.meningitidis_M22811	0.8335
N.meningitidis_38277	N.meningitidis_M22809	0.8377
N.meningitidis_38277	N.meningitidis_M22804	0.8363
N.meningitidis_38277	N.meningitidis_M22801	0.838
N.meningitidis_38277	N.meningitidis_M22797	0.8321
N.meningitidis_38277	N.meningitidis_M22790	0.8266
N.meningitidis_38277	N.meningitidis_M22783	0.8345
N.meningitidis_38277	N.meningitidis_M22772	0.8364
N.meningitidis_38277	N.meningitidis_M22769	0.8375
N.meningitidis_38277	N.meningitidis_M22759	0.8394
N.meningitidis_38277	N.meningitidis_M22748	0.8362
N.meningitidis_38277	N.meningitidis_M22747	0.8333
N.meningitidis_38277	N.meningitidis_M22745	0.8332
N.meningitidis_38277	N.meningitidis_M22740	0.8386
N.meningitidis_38277	N.meningitidis_M22722	0.8348
N.meningitidis_38277	N.meningitidis_M22718	0.8356
N.meningitidis_38277	N.meningitidis_M22191	0.8381
N.meningitidis_38277	N.meningitidis_M22189	0.8357
N.meningitidis_38277	N.meningitidis_M22160	0.8359
N.meningitidis_38277	N.meningitidis_M12752	0.8308
N.meningitidis_38277	N.meningitidis_M10208	0.8275
N.meningitidis_38277	N.meningitidis_M09293	0.8337
N.meningitidis_38277	N.meningitidis_M09261	0.8318
N.meningitidis_38277	N.meningitidis_M08001	0.836
N.meningitidis_38277	N.meningitidis_M08000	0.8334
N.meningitidis_38277	N.meningitidis_M07999	0.8351
N.meningitidis_38277	N.meningitidis_M07165	0.8288
N.meningitidis_38277	N.meningitidis_M07162	0.8333
N.meningitidis_38277	N.meningitidis_M07161	0.8317
N.meningitidis_38277	N.meningitidis_M07149	0.8346
N.meningitidis_38277	N.meningitidis_M0579	0.9016
N.meningitidis_38277	N.meningitidis_M04-240196	0.8594
N.meningitidis_38277	N.meningitidis_M01-240355	0.8453
N.meningitidis_38277	N.meningitidis_M01-240149	0.8965
N.meningitidis_38277	N.meningitidis_LNP21362	0.8411
N.meningitidis_38277	N.meningitidis_L91543	0.8382
N.meningitidis_38277	N.meningitidis_H44_76	0.8532
N.meningitidis_38277	N.meningitidis_G2136	0.8461
N.meningitidis_38277	N.meningitidis_FDAARGOS_215	0.8373
N.meningitidis_38277	N.meningitidis_FDAARGOS_214	0.8205
N.meningitidis_38277	N.meningitidis_FDAARGOS_212	0.8288
N.meningitidis_38277	N.meningitidis_FDAARGOS_211	0.8376
N.meningitidis_38277	N.meningitidis_FDAARGOS_210	0.8494
N.meningitidis_38277	N.meningitidis_FDAARGOS_209	0.8209
N.meningitidis_38277	N.meningitidis_FAM18	0.8426
N.meningitidis_38277	N.meningitidis_DE8669	0.8972
N.meningitidis_38277	N.meningitidis_DE8555	0.8294
N.meningitidis_38277	N.meningitidis_DE10444	0.8375
N.meningitidis_38277	N.meningitidis_COL-201504-11	0.8407
N.meningitidis_38277	N.meningitidis_B6116_77	0.8416
N.meningitidis_38277	N.meningitidis_alpha710	0.8824
N.meningitidis_38277	N.meningitidis_alpha14	0.8322
N.meningitidis_38277	N.meningitidis_8013	0.8359
N.meningitidis_38277	N.meningitidis_510612	0.8292
N.meningitidis_38277	N.meningitidis_38277	0.0336
N.meningitidis_510612	N.zoodegmatis_NCTC12230	0.558
N.meningitidis_510612	N.weaveri_NCTC13585	0.6083
N.meningitidis_510612	N.mucosa_C102	0.6445
N.meningitidis_510612	N.elongata_ATCC_29315	0.5786
N.meningitidis_510612	N.lactamica_Y92-1009	0.7094
N.meningitidis_510612	N.lactamica_ATCC_23970	0.7134
N.meningitidis_510612	N.lactamica_020-06	0.7039
N.meningitidis_510612	N.meningitidis_Z2491	0.9332
N.meningitidis_510612	N.meningitidis_WUE_2594	0.9531
N.meningitidis_510612	N.meningitidis_WUE2121	0.8263
N.meningitidis_510612	N.meningitidis_NZ-05_33	0.8403
N.meningitidis_510612	N.meningitidis_NM3686	0.838
N.meningitidis_510612	N.meningitidis_NM3683	0.835
N.meningitidis_510612	N.meningitidis_NM3682	0.8322
N.meningitidis_510612	N.meningitidis_MC58	0.8456
N.meningitidis_510612	N.meningitidis_M7124	0.8319
N.meningitidis_510612	N.meningitidis_M27559	0.8312
N.meningitidis_510612	N.meningitidis_M25476	0.8314
N.meningitidis_510612	N.meningitidis_M25474	0.8336
N.meningitidis_510612	N.meningitidis_M25472	0.8325
N.meningitidis_510612	N.meningitidis_M25462	0.8323
N.meningitidis_510612	N.meningitidis_M25459	0.8332
N.meningitidis_510612	N.meningitidis_M25456	0.83
N.meningitidis_510612	N.meningitidis_M25438	0.834
N.meningitidis_510612	N.meningitidis_M25419	0.8377
N.meningitidis_510612	N.meningitidis_M25087	0.8329
N.meningitidis_510612	N.meningitidis_M25074	0.8275
N.meningitidis_510612	N.meningitidis_M25073	0.827
N.meningitidis_510612	N.meningitidis_M25070	0.8322
N.meningitidis_510612	N.meningitidis_M24730	0.8311
N.meningitidis_510612	N.meningitidis_M24705	0.8671
N.meningitidis_510612	N.meningitidis_M23413	0.8314
N.meningitidis_510612	N.meningitidis_M22828	0.8664
N.meningitidis_510612	N.meningitidis_M22822	0.8642
N.meningitidis_510612	N.meningitidis_M22819	0.8666
N.meningitidis_510612	N.meningitidis_M22811	0.8615
N.meningitidis_510612	N.meningitidis_M22809	0.8653
N.meningitidis_510612	N.meningitidis_M22804	0.8644
N.meningitidis_510612	N.meningitidis_M22801	0.832
N.meningitidis_510612	N.meningitidis_M22797	0.8322
N.meningitidis_510612	N.meningitidis_M22790	0.858
N.meningitidis_510612	N.meningitidis_M22783	0.8626
N.meningitidis_510612	N.meningitidis_M22772	0.8322
N.meningitidis_510612	N.meningitidis_M22769	0.8363
N.meningitidis_510612	N.meningitidis_M22759	0.8395
N.meningitidis_510612	N.meningitidis_M22748	0.8346
N.meningitidis_510612	N.meningitidis_M22747	0.8307
N.meningitidis_510612	N.meningitidis_M22745	0.8328
N.meningitidis_510612	N.meningitidis_M22740	0.833
N.meningitidis_510612	N.meningitidis_M22722	0.8318
N.meningitidis_510612	N.meningitidis_M22718	0.8313
N.meningitidis_510612	N.meningitidis_M22191	0.8365
N.meningitidis_510612	N.meningitidis_M22189	0.8341
N.meningitidis_510612	N.meningitidis_M22160	0.832
N.meningitidis_510612	N.meningitidis_M12752	0.8313
N.meningitidis_510612	N.meningitidis_M10208	0.8288
N.meningitidis_510612	N.meningitidis_M09293	0.8329
N.meningitidis_510612	N.meningitidis_M09261	0.8341
N.meningitidis_510612	N.meningitidis_M08001	0.8339
N.meningitidis_510612	N.meningitidis_M08000	0.83
N.meningitidis_510612	N.meningitidis_M07999	0.8335
N.meningitidis_510612	N.meningitidis_M07165	0.8301
N.meningitidis_510612	N.meningitidis_M07162	0.8304
N.meningitidis_510612	N.meningitidis_M07161	0.8304
N.meningitidis_510612	N.meningitidis_M07149	0.8298
N.meningitidis_510612	N.meningitidis_M0579	0.8471
N.meningitidis_510612	N.meningitidis_M04-240196	0.8443
N.meningitidis_510612	N.meningitidis_M01-240355	0.8406
N.meningitidis_510612	N.meningitidis_M01-240149	0.8421
N.meningitidis_510612	N.meningitidis_LNP21362	0.8395
N.meningitidis_510612	N.meningitidis_L91543	0.8366
N.meningitidis_510612	N.meningitidis_H44_76	0.8468
N.meningitidis_510612	N.meningitidis_G2136	0.8423
N.meningitidis_510612	N.meningitidis_FDAARGOS_215	0.8349
N.meningitidis_510612	N.meningitidis_FDAARGOS_214	0.8158
N.meningitidis_510612	N.meningitidis_FDAARGOS_212	0.828
N.meningitidis_510612	N.meningitidis_FDAARGOS_211	0.8364
N.meningitidis_510612	N.meningitidis_FDAARGOS_210	0.8448
N.meningitidis_510612	N.meningitidis_FDAARGOS_209	0.9322
N.meningitidis_510612	N.meningitidis_FAM18	0.8361
N.meningitidis_510612	N.meningitidis_DE8669	0.8383
N.meningitidis_510612	N.meningitidis_DE8555	0.8272
N.meningitidis_510612	N.meningitidis_DE10444	0.8719
N.meningitidis_510612	N.meningitidis_COL-201504-11	0.8338
N.meningitidis_510612	N.meningitidis_B6116_77	0.8387
N.meningitidis_510612	N.meningitidis_alpha710	0.8365
N.meningitidis_510612	N.meningitidis_alpha14	0.8251
N.meningitidis_510612	N.meningitidis_8013	0.8399
N.meningitidis_510612	N.meningitidis_510612	0.0317
N.meningitidis_8013	N.zoodegmatis_NCTC12230	0.5536
N.meningitidis_8013	N.weaveri_NCTC13585	0.6009
N.meningitidis_8013	N.mucosa_C102	0.6441
N.meningitidis_8013	N.elongata_ATCC_29315	0.5743
N.meningitidis_8013	N.lactamica_Y92-1009	0.7029
N.meningitidis_8013	N.lactamica_ATCC_23970	0.7099
N.meningitidis_8013	N.lactamica_020-06	0.6987
N.meningitidis_8013	N.meningitidis_Z2491	0.8352
N.meningitidis_8013	N.meningitidis_WUE_2594	0.8262
N.meningitidis_8013	N.meningitidis_WUE2121	0.836
N.meningitidis_8013	N.meningitidis_NZ-05_33	0.8558
N.meningitidis_8013	N.meningitidis_NM3686	0.8372
N.meningitidis_8013	N.meningitidis_NM3683	0.8425
N.meningitidis_8013	N.meningitidis_NM3682	0.841
N.meningitidis_8013	N.meningitidis_MC58	0.8404
N.meningitidis_8013	N.meningitidis_M7124	0.8416
N.meningitidis_8013	N.meningitidis_M27559	0.8383
N.meningitidis_8013	N.meningitidis_M25476	0.8376
N.meningitidis_8013	N.meningitidis_M25474	0.8403
N.meningitidis_8013	N.meningitidis_M25472	0.8392
N.meningitidis_8013	N.meningitidis_M25462	0.8394
N.meningitidis_8013	N.meningitidis_M25459	0.8403
N.meningitidis_8013	N.meningitidis_M25456	0.8375
N.meningitidis_8013	N.meningitidis_M25438	0.8411
N.meningitidis_8013	N.meningitidis_M25419	0.8396
N.meningitidis_8013	N.meningitidis_M25087	0.8352
N.meningitidis_8013	N.meningitidis_M25074	0.8354
N.meningitidis_8013	N.meningitidis_M25073	0.8341
N.meningitidis_8013	N.meningitidis_M25070	0.838
N.meningitidis_8013	N.meningitidis_M24730	0.8382
N.meningitidis_8013	N.meningitidis_M24705	0.8432
N.meningitidis_8013	N.meningitidis_M23413	0.8393
N.meningitidis_8013	N.meningitidis_M22828	0.8416
N.meningitidis_8013	N.meningitidis_M22822	0.843
N.meningitidis_8013	N.meningitidis_M22819	0.8444
N.meningitidis_8013	N.meningitidis_M22811	0.8403
N.meningitidis_8013	N.meningitidis_M22809	0.8445
N.meningitidis_8013	N.meningitidis_M22804	0.8414
N.meningitidis_8013	N.meningitidis_M22801	0.8422
N.meningitidis_8013	N.meningitidis_M22797	0.8397
N.meningitidis_8013	N.meningitidis_M22790	0.8334
N.meningitidis_8013	N.meningitidis_M22783	0.8427
N.meningitidis_8013	N.meningitidis_M22772	0.8419
N.meningitidis_8013	N.meningitidis_M22769	0.8421
N.meningitidis_8013	N.meningitidis_M22759	0.8435
N.meningitidis_8013	N.meningitidis_M22748	0.8404
N.meningitidis_8013	N.meningitidis_M22747	0.8408
N.meningitidis_8013	N.meningitidis_M22745	0.8425
N.meningitidis_8013	N.meningitidis_M22740	0.841
N.meningitidis_8013	N.meningitidis_M22722	0.8419
N.meningitidis_8013	N.meningitidis_M22718	0.8406
N.meningitidis_8013	N.meningitidis_M22191	0.8432
N.meningitidis_8013	N.meningitidis_M22189	0.8407
N.meningitidis_8013	N.meningitidis_M22160	0.8426
N.meningitidis_8013	N.meningitidis_M12752	0.8393
N.meningitidis_8013	N.meningitidis_M10208	0.8307
N.meningitidis_8013	N.meningitidis_M09293	0.8413
N.meningitidis_8013	N.meningitidis_M09261	0.8433
N.meningitidis_8013	N.meningitidis_M08001	0.8419
N.meningitidis_8013	N.meningitidis_M08000	0.8401
N.meningitidis_8013	N.meningitidis_M07999	0.8436
N.meningitidis_8013	N.meningitidis_M07165	0.8394
N.meningitidis_8013	N.meningitidis_M07162	0.8387
N.meningitidis_8013	N.meningitidis_M07161	0.8388
N.meningitidis_8013	N.meningitidis_M07149	0.8404
N.meningitidis_8013	N.meningitidis_M0579	0.8542
N.meningitidis_8013	N.meningitidis_M04-240196	0.8527
N.meningitidis_8013	N.meningitidis_M01-240355	0.8856
N.meningitidis_8013	N.meningitidis_M01-240149	0.8536
N.meningitidis_8013	N.meningitidis_LNP21362	0.829
N.meningitidis_8013	N.meningitidis_L91543	0.8463
N.meningitidis_8013	N.meningitidis_H44_76	0.8434
N.meningitidis_8013	N.meningitidis_G2136	0.8516
N.meningitidis_8013	N.meningitidis_FDAARGOS_215	0.8795
N.meningitidis_8013	N.meningitidis_FDAARGOS_214	0.8657
N.meningitidis_8013	N.meningitidis_FDAARGOS_212	0.8299
N.meningitidis_8013	N.meningitidis_FDAARGOS_211	0.8815
N.meningitidis_8013	N.meningitidis_FDAARGOS_210	0.8423
N.meningitidis_8013	N.meningitidis_FDAARGOS_209	0.8241
N.meningitidis_8013	N.meningitidis_FAM18	0.8459
N.meningitidis_8013	N.meningitidis_DE8669	0.8551
N.meningitidis_8013	N.meningitidis_DE8555	0.8365
N.meningitidis_8013	N.meningitidis_DE10444	0.8454
N.meningitidis_8013	N.meningitidis_COL-201504-11	0.8401
N.meningitidis_8013	N.meningitidis_B6116_77	0.8444
N.meningitidis_8013	N.meningitidis_alpha710	0.8497
N.meningitidis_8013	N.meningitidis_alpha14	0.8249
N.meningitidis_8013	N.meningitidis_8013	0.0309
N.meningitidis_alpha14	N.zoodegmatis_NCTC12230	0.5572
N.meningitidis_alpha14	N.weaveri_NCTC13585	0.6129
N.meningitidis_alpha14	N.mucosa_C102	0.6544
N.meningitidis_alpha14	N.elongata_ATCC_29315	0.5829
N.meningitidis_alpha14	N.lactamica_Y92-1009	0.7187
N.meningitidis_alpha14	N.lactamica_ATCC_23970	0.7151
N.meningitidis_alpha14	N.lactamica_020-06	0.72
N.meningitidis_alpha14	N.meningitidis_Z2491	0.827
N.meningitidis_alpha14	N.meningitidis_WUE_2594	0.8123
N.meningitidis_alpha14	N.meningitidis_WUE2121	0.8364
N.meningitidis_alpha14	N.meningitidis_NZ-05_33	0.8333
N.meningitidis_alpha14	N.meningitidis_NM3686	0.843
N.meningitidis_alpha14	N.meningitidis_NM3683	0.8382
N.meningitidis_alpha14	N.meningitidis_NM3682	0.837
N.meningitidis_alpha14	N.meningitidis_MC58	0.8176
N.meningitidis_alpha14	N.meningitidis_M7124	0.8381
N.meningitidis_alpha14	N.meningitidis_M27559	0.8396
N.meningitidis_alpha14	N.meningitidis_M25476	0.8344
N.meningitidis_alpha14	N.meningitidis_M25474	0.839
N.meningitidis_alpha14	N.meningitidis_M25472	0.8387
N.meningitidis_alpha14	N.meningitidis_M25462	0.8398
N.meningitidis_alpha14	N.meningitidis_M25459	0.8394
N.meningitidis_alpha14	N.meningitidis_M25456	0.8375
N.meningitidis_alpha14	N.meningitidis_M25438	0.8398
N.meningitidis_alpha14	N.meningitidis_M25419	0.8405
N.meningitidis_alpha14	N.meningitidis_M25087	0.836
N.meningitidis_alpha14	N.meningitidis_M25074	0.8318
N.meningitidis_alpha14	N.meningitidis_M25073	0.8344
N.meningitidis_alpha14	N.meningitidis_M25070	0.8339
N.meningitidis_alpha14	N.meningitidis_M24730	0.8364
N.meningitidis_alpha14	N.meningitidis_M24705	0.8356
N.meningitidis_alpha14	N.meningitidis_M23413	0.8398
N.meningitidis_alpha14	N.meningitidis_M22828	0.8339
N.meningitidis_alpha14	N.meningitidis_M22822	0.8336
N.meningitidis_alpha14	N.meningitidis_M22819	0.8336
N.meningitidis_alpha14	N.meningitidis_M22811	0.83
N.meningitidis_alpha14	N.meningitidis_M22809	0.8338
N.meningitidis_alpha14	N.meningitidis_M22804	0.8328
N.meningitidis_alpha14	N.meningitidis_M22801	0.8391
N.meningitidis_alpha14	N.meningitidis_M22797	0.837
N.meningitidis_alpha14	N.meningitidis_M22790	0.8243
N.meningitidis_alpha14	N.meningitidis_M22783	0.8315
N.meningitidis_alpha14	N.meningitidis_M22772	0.8388
N.meningitidis_alpha14	N.meningitidis_M22769	0.8408
N.meningitidis_alpha14	N.meningitidis_M22759	0.8414
N.meningitidis_alpha14	N.meningitidis_M22748	0.8404
N.meningitidis_alpha14	N.meningitidis_M22747	0.836
N.meningitidis_alpha14	N.meningitidis_M22745	0.8377
[truncated: 3,780 more rows]
