# Supplementary material for: Genus-Wide Comparative Genomics Analysis of Neisseria to Identify New Genes Associated with Pathogenicity and Niche Adaptation of Neisseria Pathogens
Source: Int J Genomics. 2019 Jan 15;2019:6015730. doi: 10.1155/2019/6015730 (PMC6350579; doi:10.1155/2019/6015730)
Supplement: Supplementary 3 — Table S2: (A) UGNP in N. gonorrhoeae 32867; (B) UGNGS in N. gonorrhoeae 32867. [file 6015730.f3.xlsx]

## Sheet: UGNP_ref_N. gonorrhoeae 32867
Table S2(A) UGNP in N. gonorrhoeae 32867
##Operon id	gene_id	gene start	gene end	strand	COG_id	gene_name	function description	number_of_SSR	SSR_attributes(start;end;psize;period;sequence)
opr_6	orf_15	12208	12477	-	K	YiaG	DNA-binding transcriptional regulator YiaG	1	12259;12269;2.2;CGCCG;CGCCGCGCCGC
	orf_16	12516	12665	-	S	-	Uncharacterized protein	1	12591;12598;2.7;GGC;GGCGGCGG
	orf_17	12755	12883	-	S	-	Uncharacterized protein	0	-
opr_9	orf_23	15161	15688	+	VT	-	GAF domain-containing protein	2	15300;15308;3.0;CGG;CGGCGGCGG**15334;15343;2.5;GTGG;GTGGGTGGGT
opr_11	orf_27	17114	18841	-	P	-	Outer membrane receptor for ferric coprogen and ferric-rhodotorulic acid	3	17597;17603;2.3;GTA;GTAGTAG**17665;17673;3.0;CGG;CGGCGGCGG**18074;18098;2.1;GGCGTTGGGAAT;GGCGTTGGGAATGGCGTTGGGAATG
opr_12	orf_28	19544	19867	-	G	-	Mannose-6-phosphate isomerase	0	-
opr_14	orf_30	19900	20871	-	P	-	ABC-type enterochelin transport system	5	19950;19957;2.7;CCG;CCGCCGCC**20017;20024;2.0;TTGC;TTGCTTGC**20113;20120;2.7;GAT;GATGATGA**20303;20314;2.0;CCTTTG;CCTTTGCCTTTG**20783;20789;2.3;GCG;GCGGCGG
opr_15	orf_31	21107	22063	+	K	-	AraC-type DNA-binding domain and AraC-containing proteins	7	21282;21291;3.3;GCG;GCGGCGGCGG**21468;21475;2.7;GCG;GCGGCGGC**21618;21627;3.3;CGG;CGGCGGCGGC**21635;21641;2.3;CTG;CTGCTGC**21730;21737;2.7;CCG;CCGCCGCC**21751;21759;3.0;CCG;CCGCCGCCG**21799;21809;2.8;CGCC;CGCCCGCCCGC
opr_17	orf_38	28777	29586	-	S	-	Lipoprotein GNA1870 C terminal like	1	29529;29535;2.3;CAC;CACCACC
opr_24	orf_48	37797	38549	-	X	-	Transposase	3	38269;38279;2.8;CCGG;CCGGCCGGCCG**38332;38338;7.0;T;TTTTTTT**38339;38344;3.0;GC;GCGCGC
opr_35	orf_65	52954	56103	-	NW	-	Tfp pilus assembly protein	10	52956;52964;3.0;AGA;AGAAGAAGA**53323;53330;4.0;GC;GCGCGCGC**53973;53984;2.0;CATACA;CATACACATACA**54557;54569;2.2;TTGTCA;TTGTCATTGTCAT**54607;54612;6.0;T;TTTTTT**54609;54634;3.4;TTTTGCTG;TTTTGCCGTTTTGTGTTTTGCTGTTT**54633;54643;2.8;TTGG;TTGGTTGGTTG**54690;54698;3.0;GCA;GCAGCAGCA**55683;55693;2.2;GCCCG;GCCCGGCCCGG**56013;56025;13.0;C;CCCCCCCCCCCCC
opr_43	orf_78	62600	63010	-	S	-	Uncharacterized membrane protein	0	-
opr_56	orf_108	87388	87555	+	-	-	Oxidoreductase-like, N-terminal	0	-
opr_59	orf_111	88738	90030	-	E	-	Alanine-alpha-ketoisovalerate (or valine-pyruvate) aminotransferase	3	89122;89128;2.3;GGC;GGCGGCG**89181;89198;2.0;TGACGGCTT;TGACGGCTTTGACGGCTT**89914;89923;3.3;GCC;GCCGCCGCCG
	orf_118	97516	97980	-	K	nrdR	Transcriptional regulator NrdR	3	97594;97600;2.3;GGC;GGCGGCG**97759;97769;3.7;GGC;GGCGGCGGCGG**97893;97906;4.7;GGC;GGCGGCGGCGGCGG
opr_63	orf_129	104743	105210	-	NW	PilP	Tfp pilus assembly protein PilP	4	104872;104878;2.3;GTC;GTCGTCG**104921;104932;2.0;CCGACA;CCGACACCGACA**105070;105075;6.0;T;TTTTTT**105191;105201;2.2;TCGCG;TCGCGTCGCGT
opr_71	orf_143	118906	120411	-	M	-	D-alanyl-D-alanine carboxypeptidase	12	118941;118950;2.5;CCAG;CCAGCCAGCC**118963;118969;2.3;GAT;GATGATG**119025;119033;3.0;TGA;TGATGATGA**119496;119501;3.0;GT;GTGTGT**119507;119518;2.0;ATGCCG;ATGCCGATGCCG**119531;119539;3.0;CCG;CCGCCGCCG**119542;119549;2.0;CAGC;CAGCCAGC**119680;119685;6.0;T;TTTTTT**119804;119815;2.0;ACCATA;ACCATAACCATA**120052;120062;2.2;TACCG;TACCGTACCGT**120278;120288;3.7;AGC;AGCAGCAGCAG**120333;120339;7.0;A;AAAAAAA
opr_73	orf_146	121415	122728	+	C	-	Mg2+/citrate symporter	6	121599;121612;2.3;TTATGT;TTATGTTTATGTTT**121882;121889;2.0;GGGC;GGGCGGGC**122013;122018;6.0;A;AAAAAA**122087;122095;3.0;GAA;GAAGAAGAA**122286;122293;2.7;TGA;TGATGATG**122604;122618;2.5;TGGGTT;TGGGTTTGGGTTTGG
opr_77	orf_156	131187	131480	-	S	-	Uncharacterized membrane protein	2	131407;131420;2.3;CCCAAA;CCCAAACCCAAACC**131458;131467;3.3;AGG;AGGAGGAGGA
opr_78	orf_158	131732	132886	+	J	-	Ribosomal protein L16 Arg81 hydroxylase	0	-
opr_84	orf_167	140285	140800	+	S	-	Domain of Unknown Function (DUF1543)	1	140599;140608;3.3;CGC;CGCCGCCGCC
opr_87	orf_174	144375	145844	-	C	NhaC	Na+/H+ antiporter NhaC	10	144423;144433;2.2;CAATA;CAATACAATAC**144493;144506;4.7;GCG;GCGGCGGCGGCGGC**144558;144565;4.0;GC;GCGCGCGC**144684;144692;3.0;GGC;GGCGGCGGC**145165;145171;2.3;TCG;TCGTCGT**145235;145243;3.0;CGA;CGACGACGA**145554;145565;2.4;CGCGC;CGCGCCGCGCCG**145627;145637;2.2;AGTGA;AGTGAAGTGAA**145701;145712;2.4;CCAAG;CCAAGCCAAGCC**145831;145843;2.2;AGTGCC;AGTGCCAGTGCCA
opr_89	orf_178	148411	148878	-	S	YqaA	Uncharacterized membrane protein YqaA	2	148554;148565;2.0;ACGCAA;ACGCAAACGCAA**148602;148607;6.0;T;TTTTTT
opr_90	orf_180	149204	150484	+	G	gluP	Fucose permease	1	149675;149686;2.0;ACGCTG;ACGCTGACGCTG
opr_95	orf_187	155764	156516	+	X	-	Transposase	3	155975;155981;7.0;A;AAAAAAA**155984;155990;2.3;CCG;CCGCCGC**156034;156044;2.8;CGGC;CGGCCGGCCGG
opr_102	orf_208	170361	171227	-	-	PagP	outer membrane enzyme PagP	5	170409;170424;2.0;TGAAACGT;TGAAACGTTGAAACGT**170454;170465;2.0;GAAACC;GAAACCGAAACC**170878;170890;2.2;TTGCCG;TTGCCGTTGCCGT**170919;170931;2.2;GCTGCC;GCTGCCGCTGCCG**171114;171128;2.1;AGTTTCC;AGTTTCCAGTTTCCA
opr_105	orf_229	186568	187632	-	ER	-	Threonine dehydrogenase or related Zn-dependent dehydrogenase	7	186939;186946;2.7;CAA;CAACAACA**187150;187159;2.5;GACA;GACAGACAGA**187163;187170;2.0;TCAA;TCAATCAA**187246;187263;6.0;GCC;GCCGCCGCCGCAGCCGCC**187333;187339;2.3;GAT;GATGATG**187456;187467;2.0;CGGATG;CGGATGCGGATG**187621;187627;2.3;TGC;TGCTGCT
opr_110	orf_239	196783	198183	+	E	-	Glycine/D-amino acid oxidase (deaminating)	5	196800;196807;8.0;T;TTTTTTTT**197001;197009;3.0;CGG;CGGCGGCGG**197250;197261;2.0;CGATTG;CGATTGCGATTG**197285;197295;2.8;CCGT;CCGTCCGTCCG**197702;197709;4.0;GC;GCGCGCGC
opr_111	orf_240	198277	199743	-	P	AmtB	Ammonia channel protein AmtB	5	198787;198799;2.2;CGCCAT;CGCCATCGCCATC**198801;198810;3.3;CCG;CCGCCGCCGC**198840;198858;2.1;AGCCGAACC;AGCCGAACCAGCCGAACCA**199030;199038;3.0;GCC;GCCGCCGCC**199391;199398;8.0;T;TTTTTTTT
opr_117	orf_253	210136	211146	+	G	-	Glycosyltransferase	9	210294;210300;3.5;AT;ATATATA**210311;210363;7.6;CAAACAC;CAAACACCAAACACCAAACACCAAACACCAAACACCAAACACCAAATACCAAA**210363;210372;5.0;AT;ATATATATAT**210432;210438;3.5;AT;ATATATA**210524;210530;7.0;T;TTTTTTT**210709;210714;6.0;T;TTTTTT**210884;210890;7.0;A;AAAAAAA**210933;210943;2.2;TTCTT;TTCTTTTCTTT**211052;211075;2.0;ATAAGCTGATAT;ATAAGCTGATATATAAGCTGATAT
opr_122	orf_264	219097	220632	-	P	fbpB2	ABC-type Fe3+ transport system	6	219169;219181;4.3;GGC;GGCGGCGGCGGCG**219244;219252;3.0;CAG;CAGCAGCAG**219797;219803;7.0;A;AAAAAAA**219968;219977;3.3;TTG;TTGTTGTTGT**220122;220128;7.0;A;AAAAAAA**220599;220605;7.0;T;TTTTTTT
	orf_265	220682	221677	-	P	fbpA	ABC-type Fe3+ transport system	4	221023;221031;3.0;AGT;AGTAGTAGT**221030;221036;2.3;GTT;GTTGTTG**221295;221303;3.0;ACG;ACGACGACG**221476;221484;3.0;CTT;CTTCTTCTT
opr_124	orf_267	222068	222409	-	-	-	hypothetical protein	3	222181;222187;7.0;T;TTTTTTT**222208;222216;3.0;CGG;CGGCGGCGG**222302;222311;2.5;CCGT;CCGTCCGTCC
opr_125	orf_276	227335	229221	+	-	MafB	Neisseria toxin MafB	3	227392;227400;2.2;ATGC;ATGCATGCA**227773;227781;3.0;GGC;GGCGGCGGC**228519;228525;2.3;GCC;GCCGCCG
opr_127	orf_281	233863	234390	-	M	-	Opacity protein and related surface antigens	1	234076;234083;4.0;GC;GCGCGCGC
opr_133	orf_292	245622	246155	+	S	-	Uncharacterized protein	3	245683;245693;2.2;CCGCC;CCGCCCCGCCC**245749;245755;7.0;A;AAAAAAA**246136;246142;2.3;GCG;GCGGCGG
opr_134	orf_296	247658	247855	+	-	-	hypothetical protein	0	-
	orf_295	247340	247636	+	S	YsdA	Uncharacterized membrane protein YsdA	0	-
opr_137	orf_300	250851	251075	+	O	NMB0681	TusA-related sulfurtransferase	0	-
opr_143	orf_313	259476	260372	+	P	-	Outer membrane receptor for ferrienterochelin and colicins	2	259529;259537;3.0;GGC;GGCGGCGGC**260114;260124;2.2;CCGAA;CCGAACCGAAC
	orf_314	260386	262278	+	P	lbpA	Outer membrane receptor for ferrienterochelin and colicins	9	260393;260404;2.0;AGGCGC;AGGCGCAGGCGC**260437;260445;3.0;GGC;GGCGGCGGC**260529;260536;2.7;CGG;CGGCGGCG**260766;260777;4.0;CCG;CCGCCGCCGCCG**260873;260881;3.0;ACA;ACAACAACA**260883;260894;2.0;GCTGAA;GCTGAAGCTGAA**261478;261487;2.5;CCTT;CCTTCCTTCC**261650;261661;2.0;TTGCCG;TTGCCGTTGCCG**262088;262100;2.2;ATCTGA;ATCTGAATCTGAA
opr_144	orf_321	266257	267297	-	M	-	Membrane protein involved in colicin uptake	8	266512;266524;2.2;GGTTTT;GGTTTTGGTTTTG**266538;266543;6.0;T;TTTTTT**266718;266729;2.0;CTTTGG;CTTTGGCTTTGG**266861;266872;2.4;TTCGG;TTCGGTTCGGTT**267042;267050;3.0;CGG;CGGCGGCGG**267063;267071;3.0;CGG;CGGCGGCGG**267228;267238;3.7;GGC;GGCGGCGGCGG**267279;267289;2.8;TTTG;TTTGTTTGTTT
opr_146	orf_331	274458	279056	-	MU	iga	Type V secretory pathway	17	274838;274848;2.8;ATTG;ATTGATTGATT**275203;275209;7.0;T;TTTTTTT**275538;275546;3.0;TTC;TTCTTCTTC**275916;275928;2.2;TTCTGC;TTCTGCTTCTGCT**276011;276019;3.0;CGA;CGACGACGA**277126;277144;2.1;AAACCGCTA;AAACCGCTAAAACCGCTAA**277184;277192;3.0;CTT;CTTCTTCTT**277342;277350;3.0;TAA;TAATAATAA**277356;277369;4.7;ATC;ATCATCTTCATCAT**277473;277480;4.0;GC;GCGCGCGC**277508;277518;2.2;AAGTC;AAGTCAAGTCA**277647;…
opr_150	orf_336	283810	284628	-	R	yocS	Predicted Na+-dependent transporter	3	283919;283926;2.7;GCG;GCGGCGGC**283934;283941;2.7;GCG;GCGGCGGC**284470;284479;2.5;GGCA;GGCAGGCAGG
opr_152	orf_338	284834	285154	-	-	-	hypothetical protein	0	-
opr_158	orf_351	294551	295759	+	CP	-	NhaP-type Na+/H+ and K+/H+ antiporter with C-terminal TrkAC and CorC domains	6	294636;294645;2.5;GGGC;GGGCGGGCGG**294848;294858;2.2;TTGGC;TTGGCTTGGCT**295136;295144;3.0;GTG;GTGGTGGTG**295150;295156;2.3;GCT;GCTGCTG**295166;295172;2.3;ACG;ACGACGA**295218;295227;2.0;CCGAA;CCGAACCGAA
opr_160	orf_367	307943	308233	+	K	-	DNA-binding transcriptional regulator	0	-
opr_176	orf_401	334735	335049	-	-	-	hypothetical protein	1	334894;334904;2.2;TGCTG;TGCTGTGCTGT
opr_180	orf_418	347516	347632	+	-	-	hypothetical protein	1	347575;347582;8.0;A;AAAAAAAA
opr_181	orf_424	351502	351927	+	S	-	secreted protein	3	351508;351514;7.0;A;AAAAAAA**351593;351602;3.3;ACA;ACAACAACAA**351663;351669;7.0;A;AAAAAAA
	orf_425	351966	352709	+	H	-	Uroporphyrinogen-III synthase	3	352236;352248;2.2;GCGGGC;GCGGGCGCGGGCG**352350;352359;2.5;GGCG;GGCGGGCGGG**352470;352478;3.0;GCC;GCCGCCGCC
opr_184	orf_434	362485	362865	-	S	-	Uncharacterized conserved protein	1	362499;362504;6.0;T;TTTTTT
opr_186	orf_436	363089	363448	-	P	-	Rhodanese-related sulfurtransferase	0	-
opr_187	orf_440	369230	369892	+	E	HI_1079	ABC-type amino acid transport system	2	369502;369508;2.3;CAT;CATCATC**369724;369737;2.3;GGTAAC;GGTAACGGTAACGG
	orf_439	368359	369186	+	ET	HI_1080	ABC-type amino acid transport/signal transduction system	1	368866;368877;2.0;AAAGCC;AAAGCCAAAGCC
	orf_441	369902	370657	+	E	tcyC	ABC-type polar amino acid transport system	4	370115;370121;7.0;A;AAAAAAA**370343;370352;3.3;CAG;CAGCAGCAGC**370537;370545;3.0;CGT;CGTCGTCGT**370552;370559;2.7;CGG;CGGCGGCG
opr_194	orf_458	383394	384005	+	C	HI_1278	Nitroreductase	0	-
opr_197	orf_469	393450	394343	-	O	htpX	Zn-dependent protease with chaperone function	2	393824;393836;2.2;TCAGCG;TCAGCGTCAGCGT**394061;394070;3.3;CTT;CTTCTTCTTC
opr_205	orf_485	411210	411953	+	-	-	hypothetical protein	1	411241;411249;3.0;CCG;CCGCCGCCG
opr_207	orf_489	415594	415917	+	-	-	hypothetical protein	2	415597;415602;6.0;A;AAAAAA**415762;415772;2.8;ATGT;ATGTATGTATG
opr_208	orf_491	417001	417558	-	M	-	Glycosyltransferase involved in cell wall bisynthesis	1	417231;417239;3.0;CGC;CGCCGCCGC
opr_210	orf_500	424804	425460	-	R	-	Predicted double-glycine peptidase	3	425220;425229;3.3;CTT;CTTCTTCTTC**425291;425302;2.0;AAATCC;AAATCCAAATCC**425413;425422;3.3;GGC;GGCGGCGGCG
	orf_495	419773	420162	-	S	-	Uncharacterized conserved protein	0	-
opr_213	orf_504	428780	429703	+	J	-	Pseudouridylate synthase	3	429302;429312;2.2;CAAAA;CAAAACAAAAC**429404;429409;6.0;T;TTTTTT**429661;429671;2.2;GTCGG;GTCGGGTCGGG
opr_224	orf_521	445932	446441	+	S	YpbQ	Uncharacterized protein YpbQ	2	445941;445958;2.0;ATTTTAAGC;ATTTTAAGCATTTTAAGC**446376;446383;2.0;ATTT;ATTTATTT
opr_247	orf_577	490844	493069	-	C	icd	Monomeric isocitrate dehydrogenase	5	490925;490931;2.3;GCC;GCCGCCG**491340;491348;3.0;CCG;CCGCCGCCG**491615;491622;2.0;GGCG;GGCGGGCG**492185;492197;2.2;GTTGAC;GTTGACGTTGACG**492594;492601;8.0;T;TTTTTTTT
opr_248	orf_578	493414	494550	+	M	lst	Transfers sialic acid from the substrate CMP-sialic acid donor to the terminal beta-D-galactosyl-1,4-acetyl-beta-D- glucosamine on the lacto-N-neotetraose branch of the lipooligosaccharide	3	493682;493690;3.0;ATT;ATTATTATT**493802;493810;3.0;TGC;TGCTGCTGC**494087;494094;2.7;GCC;GCCGCCGC
opr_251	orf_581	496142	496588	-	I	HI_0827	Acyl-CoA hydrolase	2	496358;496364;2.3;GAC;GACGACG**496451;496459;3.0;GCC;GCCGCCGCC
opr_260	orf_600	505733	507139	-	S	-	mafB silent cassette	4	505991;505997;7.0;A;AAAAAAA**506087;506092;6.0;T;TTTTTT**506196;506207;2.0;GCTGTT;GCTGTTGCTGTT**506836;506848;2.2;CGTGTC;CGTGTCCGTGTCC
opr_262	orf_602	508047	508916	-	S	-	mafB silent cassette	4	508276;508285;2.5;CTAT;CTATCTATCT**508393;508399;7.0;T;TTTTTTT**508530;508535;6.0;T;TTTTTT**508639;508650;2.0;GCTGTT;GCTGTTGCTGTT
opr_265	orf_605	511642	513171	-	S	-	mafB silent cassette	4	511710;511721;2.0;TTTTGA;TTTTGATTTTGA**512119;512124;6.0;T;TTTTTT**512228;512239;2.0;GCTGTT;GCTGTTGCTGTT**512868;512880;2.2;CGTGTC;CGTGTCCGTGTCC
	orf_608	514727	514867	-	S	YbdD	Uncharacterized short protein YbdD	0	-
opr_268	orf_615	520398	521180	+	S	fimB	fimbrial assembly protein	5	520515;520529;2.5;TATCCT;TATCCTTATCCTTAT**520564;520572;3.0;TGG;TGGTGGTGG**520765;520773;3.0;CGG;CGGCGGCGG**520843;520853;2.2;GCATT;GCATTGCATTG**521090;521098;3.0;CAG;CAGCAGCAG
	orf_616	521308	521499	+	-	-	hypothetical protein	2	521440;521450;2.2;GAGCA;GAGCAGAGCAG**521454;521464;2.8;GCCC;GCCCGCCCGCC
opr_271	orf_628	528350	529108	+	E	gluD	Glutamate dehydrogenase/leucine dehydrogenase	1	528888;528896;3.0;GCG;GCGGCGGCG
opr_273	orf_632	530464	531678	+	E	alaA	Aspartate/methionine/tyrosine aminotransferase	2	530861;530870;3.3;CGG;CGGCGGCGGC**530883;530894;2.4;CGGTA;CGGTACGGTACG
	orf_631	530166	530375	+	Q	PptA	Phenylpyruvate tautomerase PptA	0	-
opr_275	orf_635	535680	536225	+	-	-	hypothetical protein	2	536127;536136;2.5;CAGG;CAGGCAGGCA**536207;536217;3.7;CCG;CCGCCGCCGCC
opr_277	orf_637	536542	536886	+	C	-	Cytochrome c553	0	-
opr_278	orf_640	538767	539513	-	R	-	Tetratricopeptide (TPR) repeat	1	539468;539477;2.5;GCCC;GCCCGCCCGC
opr_281	orf_643	541128	541508	+	X	RayT	REP element-mobilizing transposase RayT	0	-
opr_283	orf_650	545474	546364	+	GER	-	Permease of the drug/metabolite transporter (DMT) superfamily	6	545578;545588;3.7;GGC;GGCGGCGGCGG**545591;545600;2.5;TTGT;TTGTTTGTTT**545611;545620;2.5;GGGC;GGGCGGGCGG**545648;545657;2.5;CATT;CATTCATTCA**545659;545670;4.0;GCT;GCTGCTGCTGCT**546327;546335;3.0;CGG;CGGCGGCGG
opr_290	orf_659	552863	554038	-	R	YrpB	NAD(P)H-dependent flavin oxidoreductase YrpB	1	553243;553249;7.0;T;TTTTTTT
opr_297	orf_672	563009	563299	+	-	-	hypothetical protein	0	-
opr_320	orf_721	602894	604351	-	M	-	Phosphoglycerol transferase MdoB or a related enzyme of AlkP superfamily	9	602990;602997;2.7;GAT;GATGATGA**603268;603274;7.0;T;TTTTTTT**603978;603990;2.2;GGGGCG;GGGGCGGGGGCGG**604080;604087;2.0;GCCA;GCCAGCCA**604143;604149;2.3;GCG;GCGGCGG**604172;604182;2.8;CGGG;CGGGCGGGCGG**604178;604189;2.0;GGCGGT;GGCGGTGGCGGT**604198;604211;2.0;CCAAAAC;CCAAAACCCAAAAC**604244;604253;3.3;CAG;CAGCAGCAGC
opr_326	orf_736	613745	616513	-	H	NMB1497	Outer membrane cobalamin receptor protein	7	614017;614033;2.4;AAAAATC;AAAAATCAAAAATCAAA**614396;614407;2.0;CAGCTC;CAGCTCCAGCTC**614813;614818;6.0;T;TTTTTT**615403;615413;2.2;AATTG;AATTGAATTGA**615795;615805;3.7;CCG;CCGCCGCCGCC**615961;615967;2.3;TAT;TATTATT**616119;616130;2.4;CCTGC;CCTGCCCTGCCC
opr_332	orf_751	626271	626579	+	-	-	hypothetical protein	0	-
opr_333	orf_754	628401	628934	-	X	-	Transposase	3	628515;628526;2.0;ATTTAA;ATTTAAATTTAA**628540;628546;7.0;T;TTTTTTT**628725;628732;2.7;GTT;GTTGTTGT
opr_335	orf_758	631307	631573	+	-	-	hypothetical protein	2	631329;631335;7.0;T;TTTTTTT**631331;631342;2.0;TTTTTC;TTTTTCTTTTTC
opr_341	orf_778	649888	651054	+	C	sucC	Succinyl-CoA synthetase	3	650040;650046;2.3;CGG;CGGCGGC**650758;650767;3.3;GGC;GGCGGCGGCG**650906;650918;2.2;TCAACG;TCAACGTCAACGT
	orf_779	651065	651955	+	C	sucD	Succinyl-CoA synthetase	5	651406;651417;2.0;CAACGG;CAACGGCAACGG**651594;651606;2.2;GTATCG;GTATCGGTATCGG**651679;651687;3.0;CAT;CATCATCAT**651713;651722;3.3;GAA;GAAGAAGAAG**651734;651744;2.2;ATCCA;ATCCAATCCAA
opr_343	orf_783	653369	653947	+	X	insK	Transposase InsO and inactivated derivatives	0	-
opr_346	orf_792	661457	662044	+	M	-	Cell wall-associated hydrolase	2	661725;661733;3.0;GCA;GCAGCAGCA**661822;661830;3.0;GGC;GGCGGCGGC
	orf_790	658275	659816	+	G	-	Predicted arabinose efflux permease	10	658285;658292;2.7;ATA;ATAATAAT**658301;658311;2.2;CAATG;CAATGCAATGC**658414;658420;7.0;A;AAAAAAA**659040;659049;2.5;GCCT;GCCTGCCTGC**659046;659056;3.7;CTG;CTGCTGCTGCT**659292;659303;2.0;TTCGGC;TTCGGCTTCGGC**659316;659325;2.5;GGCT;GGCTGGCTGG**659443;659449;2.3;TGC;TGCTGCT**659478;659490;2.2;TGGATT;TGGATTTGGATTT**659748;659754;2.3;TCG;TCGTCGT
opr_353	orf_801	666321	666503	+	-	-	hypothetical protein	2	666362;666368;2.3;GCT;GCTGCTG**666439;666451;2.2;GTTTGG;GTTTGGGTTTGGG
opr_356	orf_809	675643	676725	+	I	AidB	Acyl-CoA dehydrogenase related to the alkylation response protein AidB	3	676131;676140;3.3;CGG;CGGCGGCGGC**676339;676350;2.0;ATCGGC;ATCGGCATCGGC**676546;676555;3.3;GCC;GCCGCCGCCG
	orf_807	674448	674819	+	S	-	Protein of unknown function (DUF2628)	0	-
opr_358	orf_814	678132	678710	+	X	insK	Transposase InsO and inactivated derivatives	0	-
opr_365	orf_834	694223	695074	-	E	-	Gamma-glutamyltranspeptidase	1	694926;695026;2.2;TCGCCCAAGATATACATCACGATCCGCAAACGCAAGCCTAGAAGCA;TCGCCCAAATATACATCACGATCCGCAAACGCAAGCCTAGAAGCATCGCCCAAGATATACATCACGATCCGCAAACGCAAGCCTAGAAGCATCGCCCAAGA
	orf_833	693808	694050	-	-	-	hypothetical protein	2	693960;693969;2.5;AATC;AATCAATCAA**693979;693986;2.0;ACCA;ACCAACCA
opr_381	orf_860	715366	715653	-	-	-	hypothetical protein	2	715558;715571;2.0;TGTTTTT;TGTTTTTTGTTTTT**715560;715565;6.0;T;TTTTTT
opr_385	orf_869	719254	719892	-	S	NMB1124	Uncharacterized protein	3	719419;719431;2.2;GCTGTT;GCTGTTGCTGTTG**719780;719786;2.3;ACC;ACCACCA**719856;719863;2.0;CAGA;CAGACAGA
	orf_870	719898	720062	-	S	-	Uncharacterized protein	0	-
opr_386	orf_871	720275	720946	-	M	CsgG	Curli biogenesis system outer membrane secretion channel CsgG	2	720468;720479;2.0;TTGACG;TTGACGTTGACG**720909;720916;2.7;GCG;GCGGCGGC
opr_387	orf_877	726513	727040	+	S	-	T5orf172	2	726561;726568;8.0;A;AAAAAAAA**726697;726708;2.0;CGGAAT;CGGAATCGGAAT
	orf_878	727076	727828	+	S	YegJ	Uncharacterized conserved protein YegJ	1	727190;727198;3.0;CGC;CGCCGCCGC
opr_388	orf_880	728478	728825	-	-	-	hypothetical protein	0	-
opr_392	orf_899	743917	744999	-	P	-	Sulfate adenylyltransferase subunit 1	2	743979;743987;3.0;CGG;CGGCGGCGG**744936;744945;3.3;CGC;CGCCGCCGCC
	orf_895	740335	741717	-	P	cysI	Sulfite reductase	5	740339;740346;4.0;GC;GCGCGCGC**741292;741305;2.3;GTTGCC;GTTGCCGTTGCCGT**741318;741331;2.0;GCCCGCC;GCCCGCCGCCCGCC**741503;741516;2.0;GAACTTT;GAACTTTGAACTTT**741657;741665;3.0;CCG;CCGCCGCCG
	orf_897	742127	743161	-	P	cysJ	Sulfite reductase	2	742285;742290;3.0;GC;GCGCGC**742366;742371;3.0;CG;CGCGCG
opr_397	orf_908	756596	756916	-	K	-	Transcriptional regulator	3	756670;756678;3.0;GCA;GCAGCAGCA**756686;756692;2.3;CGC;CGCCGCC**756702;756710;3.0;GCC;GCCGCCGCC
opr_400	orf_915	760562	760687	+	-	-	hypothetical protein	0	-
opr_447	orf_1004	848404	849018	-	H	mobA	Molybdopterin-guanine dinucleotide biosynthesis protein A	3	848483;848491;3.0;TGC;TGCTGCTGC**848708;848716;3.0;GCC;GCCGCCGCC**848984;848993;2.5;GCGG;GCGGGCGGGC
opr_448	orf_1006	851054	851647	+	TK	-	DNA-binding response regulator	3	851215;851221;2.3;GCA;GCAGCAG**851283;851291;4.5;GC;GCGCGCGCG**851597;851603;2.3;GCC;GCCGCCG
	orf_1005	849225	850994	+	T	-	Signal transduction histidine kinase	3	849329;849337;3.0;GCT;GCTGCTGCT**849505;849514;2.5;CCAT;CCATCCATCC**849691;849697;7.0;A;AAAAAAA
opr_451	orf_1009	853661	854413	+	X	-	Transposase	3	853872;853878;7.0;A;AAAAAAA**853881;853887;2.3;CCG;CCGCCGC**853931;853941;2.8;CGGC;CGGCCGGCCGG
opr_452	orf_1011	854625	855110	-	F	purE	Phosphoribosylcarboxyaminoimidazole (NCAIR) mutase	3	854906;854917;2.4;GCGCC;GCGCCGCGCCGC**854928;854934;2.3;GAT;GATGATG**855088;855096;3.0;ATG;ATGATGATG
opr_456	orf_1020	863388	864152	+	E	aroD	3-dehydroquinate dehydratase	7	863674;863682;3.0;ATT;ATTATTATT**863726;863737;2.0;TATCGA;TATCGATATCGA**863785;863791;7.0;A;AAAAAAA**863798;863804;2.3;CGC;CGCCGCC**863833;863841;3.0;CGC;CGCCGCCGC**863842;863849;2.7;AAG;AAGAAGAA**864059;864069;2.2;GTTCG;GTTCGGTTCGG
opr_457	orf_1022	866257	867315	-	L	dinB	Nucleotidyltransferase/DNA polymerase involved in DNA repair	4	866272;866280;3.0;CTG;CTGCTGCTG**866305;866316;2.0;ACCGAT;ACCGATACCGAT**866593;866605;2.2;GCGTTC;GCGTTCGCGTTCG**866739;866745;7.0;T;TTTTTTT
opr_465	orf_1035	875289	876743	+	S	-	Microcystin-dependent protein (function unknown)	9	875476;875483;2.7;ACG;ACGACGAC**875640;875649;2.5;ACAA;ACAAACAAAC**875715;875725;2.8;GGCT;GGCTGGCTGGC**875939;875949;3.7;CGC;CGCCGCCGCCG**876001;876010;2.5;GGAC;GGACGGACGG**876236;876248;2.2;CCACAC;CCACACCCACACC**876533;876542;3.3;CGC;CGCCGCCGCC**876543;876549;2.3;ATT;ATTATTA**876666;876673;4.0;AG;AGAGAGAG
opr_468	orf_1045	879618	880631	-	-	-	hypothetical protein	7	879963;879971;3.0;CGC;CGCCGCCGC**879971;879978;2.7;CTT;CTTCTTCT**880110;880117;2.0;CTGA;CTGACTGA**880398;880411;2.0;GATATGC;GATATGCGATATGC**880442;880451;3.3;CGT;CGTCGTCGTC**880535;880544;2.0;TTTCC;TTTCCTTTCC**880621;880628;8.0;T;TTTTTTTT
opr_477	orf_1062	893677	894621	-	U	-	Hemolysin activation/secretion protein	2	894165;894172;4.0;GC;GCGCGCGC**894261;894270;2.5;CCAA;CCAACCAACC
opr_487	orf_1088	917833	918432	-	K	-	DNA-binding transcriptional regulator	1	918249;918259;2.8;CGCC;CGCCCGCCCGC
opr_488	orf_1090	918986	919453	+	S	-	integral membrane protein	2	919186;919192;2.3;ATT;ATTATTA**919228;919234;7.0;A;AAAAAAA
	orf_1091	919481	919972	+	S	-	integral membrane protein	1	919575;919580;6.0;A;AAAAAA
opr_490	orf_1094	920402	920770	+	-	-	hypothetical protein	1	920458;920464;2.3;CGG;CGGCGGC
	orf_1096	922299	923093	+	T	RIO1	Serine/threonine-protein kinase RIO1	3	922419;922429;2.8;GCAG;GCAGGCAGGCA**922662;922674;2.2;GAAGCC;GAAGCCGAAGCCG**923027;923037;2.2;GGGAC;GGGACGGGACG
opr_493	orf_1102	928368	929648	-	S	YkwD	Uncharacterized conserved protein YkwD	6	928445;928456;2.0;CGCTGA;CGCTGACGCTGA**928664;928671;4.0;GC;GCGCGCGC**928671;928678;2.0;CCGT;CCGTCCGT**928952;928961;3.3;CGC;CGCCGCCGCC**929421;929430;2.5;GCGT;GCGTGCGTGC**929433;929440;2.0;GCGG;GCGGGCGG
opr_494	orf_1107	934503	934757	+	-	-	hypothetical protein	3	934613;934635;1.9;CGCCGCCGAACG;CGCCGCCGAACGCGCCGCCGAAC**934611;934620;3.3;GCC;GCCGCCGCCG**934731;934737;7.0;A;AAAAAAA
opr_500	orf_1125	948641	949483	+	S	YbjX	Uncharacterized protein VirK/YbjX	2	948658;948664;7.0;A;AAAAAAA**949150;949158;3.0;CGC;CGCCGCCGC
opr_501	orf_1127	951183	952193	+	C	-	Ferredoxin-NADP reductase	2	951432;951446;2.5;ATCAAC;ATCAACATCAACATC**951989;951999;2.2;GTCCC;GTCCCGTCCCG
opr_508	orf_1135	958771	959244	-	O	dnrN	Iron-sulfur cluster repair protein YtfE	1	959050;959056;2.3;CAG;CAGCAGC
opr_518	orf_1152	970967	971728	+	L	Mod	Adenine specific DNA methylase Mod	4	971116;971121;6.0;A;AAAAAA**971217;971225;3.0;CCG;CCGCCGCCG**971559;971570;2.0;AACAAA;AACAAAAACAAA**971652;971662;3.7;ATG;ATGATGATGAT
	orf_1153	971736	974492	+	S	HI_1055	Uncharacterized protein	9	971972;971981;3.3;GAT;GATGATGATG**972023;972028;6.0;T;TTTTTT**972892;972903;2.0;AATTTG;AATTTGAATTTG**972972;972984;2.2;AACAAA;AACAAAAACAAAA**972988;972993;6.0;A;AAAAAA**973479;973485;7.0;A;AAAAAAA**973998;974003;6.0;A;AAAAAA**974361;974368;2.0;GGGA;GGGAGGGA**974380;974386;7.0;A;AAAAAAA
opr_525	orf_1167	987828	989255	-	I	AidB	Acyl-CoA dehydrogenase related to the alkylation response protein AidB	5	988270;988278;3.0;GCG;GCGGCGGCG**988333;988351;2.1;GCGACGGGC;GCGACGGGCGCGACGGGCG**988889;988900;2.0;CGCCTT;CGCCTTCGCCTT**989062;989069;2.0;CGCC;CGCCCGCC**989245;989250;3.0;GT;GTGTGT
opr_530	orf_1179	1001725	1001838	-	-	-	hypothetical protein	1	1001824;1001834;3.7;CGC;CGCCGCCGCCG
opr_531	orf_1180	1002023	1002334	+	-	-	hypothetical protein	1	1002069;1002080;2.0;CTGCCG;CTGCCGCTGCCG
opr_534	orf_1186	1008386	1009756	+	R	HI_1690	Na+-dependent transporter	1	1008511;1008521;3.7;CGG;CGGCGGCGGCG
opr_535	orf_1190	1013004	1013411	-	K	HI_0186	DNA-binding transcriptional regulator	0	-
opr_536	orf_1191	1013912	1014262	+	R	-	Zn-dependent alcohol dehydrogenase	0	-
	orf_1192	1014267	1014671	+	R	-	Zn-dependent alcohol dehydrogenase	1	1014413;1014422;3.3;CAT;CATCATCATC
opr_542	orf_1204	1027821	1028303	-	-	-	hypothetical protein	2	1027920;1027926;7.0;T;TTTTTTT**1028057;1028066;2.5;CGAC;CGACCGACCG
opr_551	orf_1226	1048008	1048139	-	-	-	hypothetical protein	0	-
	orf_1223	1044376	1044528	-	S	YwqG	Uncharacterized protein YwqG	0	-
opr_552	orf_1229	1049426	1049821	+	K	NGO0568	RNase H-fold protein	0	-
opr_553	orf_1230	1049831	1050502	-	Q	-	2-keto-4-pentenoate hydratase/2-oxohepta-3-ene-1	1	1050104;1050113;2.5;CACG;CACGCACGCA
opr_556	orf_1237	1061770	1062963	-	P	-	Outer membrane receptor for ferric coprogen and ferric-rhodotorulic acid	1	1061932;1061939;4.0;GC;GCGCGCGC
opr_558	orf_1244	1065833	1067278	+	E	aspA	Aspartate ammonia-lyase	7	1065990;1065995;3.0;AA;AAAAAA**1066025;1066037;2.2;ATGGTG;ATGGTGATGGTGA**1066090;1066099;3.3;CGC;CGCCGCCGCC**1066171;1066182;2.4;GGGCG;GGGCGGGGCGGG**1066788;1066794;3.5;CG;CGCGCGC**1066930;1066937;2.7;CGC;CGCCGCCG**1067222;1067230;3.0;GAA;GAAGAAGAA
opr_563	orf_1250	1074820	1075512	-	S	-	Uncharacterized membrane protein	1	1074910;1074918;3.0;AAT;AATAATAAT
opr_564	orf_1252	1076088	1076450	+	V	RidA	Enamine deaminase RidA	2	1076230;1076239;2.5;GCTG;GCTGGCTGGC**1076353;1076363;2.8;CGCC;CGCCCGCCCGC
opr_566	orf_1261	1086349	1087464	-	G	glxK	Glycerate kinase	3	1086664;1086671;2.0;CAGG;CAGGCAGG**1086737;1086748;2.0;GCTCCT;GCTCCTGCTCCT**1087068;1087079;2.0;CGCCAA;CGCCAACGCCAA
	orf_1263	1088757	1090283	-	R	-	Predicted regulatory domain of a methyltransferase	4	1088784;1088801;2.0;GTCTGCCAA;GTCTGCCAAGTCTGCCAA**1089024;1089032;3.0;GGC;GGCGGCGGC**1089666;1089674;3.0;GCC;GCCGCCGCC**1090043;1090052;2.5;CCTG;CCTGCCTGCC
opr_569	orf_1269	1095023	1096045	+	E	-	Lysophospholipase L1 or related esterase	6	1095297;1095307;3.7;GCG;GCGGCGGCGGC**1095421;1095430;3.3;CGG;CGGCGGCGGC**1095664;1095674;3.7;CAA;CAACAACAACA**1095738;1095746;3.0;CCG;CCGCCGCCG**1095753;1095760;2.7;TCA;TCATCATC**1096024;1096032;3.0;CGC;CGCCGCCGC
	orf_1268	1093872	1094855	+	S	-	Uncharacterized protein	5	1094018;1094031;2.8;GCGGA;GCGGAGCGGAGCGG**1094162;1094171;2.5;GCCG;GCCGGCCGGC**1094199;1094208;3.3;GCC;GCCGCCGCCG**1094711;1094724;2.3;CGTCAA;CGTCAACGTCAACG**1094794;1094799;6.0;A;AAAAAA
opr_571	orf_1271	1096297	1097850	+	IQ	-	Acyl-CoA synthetase (AMP-forming)/AMP-acid ligase II	10	1096332;1096341;3.3;CGC;CGCCGCCGCC**1096351;1096363;2.2;AACGGC;AACGGCAACGGCA**1096358;1096368;2.2;ACGGC;ACGGCACGGCA**1096399;1096405;3.5;CG;CGCGCGC**1096414;1096426;2.2;GAAGCC;GAAGCCGAAGCCG**1096700;1096713;3.5;GCCG;GCCGGCCGGCCGGC**1097168;1097176;3.0;GCG;GCGGCGGCG**1097511;1097523;2.2;CTTTAT;CTTTATCTTTATC**1097584;1097592;3.0;GAA;GAAGAAGAA**1097617;1097626;3.3;GCC;GCCGCCGCCG
opr_572	orf_1272	1097940	1099967	-	M	HI_1706	Choline-glycine betaine transporter	12	1097994;1098001;2.7;CAA;CAACAACA**1098358;1098369;2.0;TCCTGC;TCCTGCTCCTGC**1098499;1098511;2.2;ATCAGC;ATCAGCATCAGCA**1098582;1098594;2.2;AACGGC;AACGGCAACGGCA**1098982;1098990;3.0;CAC;CACCACCAC**1099152;1099159;2.7;CAG;CAGCAGCA**1099146;1099151;6.0;A;AAAAAA**1099484;1099496;2.2;AAGCCA;AAGCCAAAGCCAA**1099503;1099512;2.0;CGTAC;CGTACCGTAC**1099560;1099569;3.3;CTG;CTGCTGCTGC**1099888;1099896;4.5;AC;AC…
opr_574	orf_1276	1103027	1103215	+	-	-	hypothetical protein	3	1103047;1103053;7.0;T;TTTTTTT**1103059;1103066;2.7;CAT;CATCATCA**1103078;1103085;2.7;TTC;TTCTTCTT
opr_599	orf_1352	1154663	1155700	-	L	NicK	DNA relaxase NicK	3	1154981;1154987;7.0;T;TTTTTTT**1155603;1155612;2.5;CGCC;CGCCCGCCCG**1155635;1155646;2.0;TCCGAA;TCCGAATCCGAA
	orf_1348	1153549	1153827	-	-	-	hypothetical protein	0	-
	orf_1349	1153834	1154118	-	-	-	hypothetical protein	0	-
	orf_1350	1154126	1154323	-	-	-	hypothetical protein	1	1154266;1154273;4.0;GA;GAGAGAGA
	orf_1351	1154328	1154618	-	-	-	hypothetical protein	1	1154475;1154482;2.7;AGT;AGTAGTAG
opr_608	orf_1364	1166988	1167521	-	J	HI_0042	Pseudouridylate synthase	0	-
opr_615	orf_1379	1182399	1183808	+	P	ClcA	H+/Cl- antiporter ClcA	11	1182839;1182857;2.1;GGGCGCGTG;GGGCGCGTGGGGCGCGTGG**1182909;1182927;2.1;GCGGCGGGC;GCGGCGGGCGCGGCGGGCG**1182908;1182915;2.7;GGC;GGCGGCGG**1182911;1182928;4.2;GGCG;GGCGGGCGCGGCGGGCGG**1182933;1182940;2.7;GCA;GCAGCAGC**1183194;1183202;3.0;GCG;GCGGCGGCG**1183244;1183253;3.3;GCT;GCTGCTGCTG**1183268;1183276;3.0;GCT;GCTGCTGCT**1183376;1183385;3.3;CGC;CGCCGCCGCC**1183580;1183589;3.3;CGT;CGTCGTCGTC**118375…
opr_622	orf_1390	1199381	1200160	-	I	psd	Phosphatidylserine decarboxylase	3	1199421;1199431;3.7;GCC;GCCGCCGCCGC**1199439;1199446;2.7;TGC;TGCTGCTG**1200099;1200107;3.0;CCG;CCGCCGCCG
opr_625	orf_1406	1216825	1217541	-	K	-	DNA-binding transcriptional regulator	3	1216912;1216920;3.0;CAG;CAGCAGCAG**1216945;1216958;2.3;ATGCGT;ATGCGTATGCGTAT**1217409;1217417;3.0;GCA;GCAGCAGCA
	orf_1405	1215774	1216676	-	S	YbjE	Uncharacterized membrane protein YbjE	5	1215810;1215816;2.3;GGC;GGCGGCG**1215823;1215830;2.7;ACC;ACCACCAC**1215911;1215918;2.7;CGC;CGCCGCCG**1216461;1216471;2.8;ACAA;ACAAACAAACA**1216545;1216555;3.7;CAG;CAGCAGCAGCA
opr_629	orf_1420	1230616	1230954	-	C	YgiN	Quinol monooxygenase YgiN	1	1230758;1230767;2.0;CGGTT;CGGTTCGGTT
opr_631	orf_1431	1240050	1240778	+	I	-	3-hydroxyisobutyrate dehydrogenase or related beta-hydroxyacid dehydrogenase	3	1240518;1240524;7.0;A;AAAAAAA**1240706;1240712;7.0;A;AAAAAAA**1240736;1240742;7.0;C;CCCCCCC
	orf_1427	1235748	1236635	+	S	-	Uncharacterized protein	3	1235762;1235768;7.0;A;AAAAAAA**1236075;1236080;6.0;A;AAAAAA**1236150;1236160;2.2;TTCTC;TTCTCTTCTCT
opr_632	orf_1433	1241597	1242451	+	V	-	ABC-type multidrug transport system	4	1242006;1242017;2.0;TGCTGG;TGCTGGTGCTGG**1242273;1242281;3.0;TGA;TGATGATGA**1242317;1242324;2.0;TCGG;TCGGTCGG**1242423;1242433;2.2;CGGAA;CGGAACGGAAC
opr_633	orf_1434	1242502	1243602	-	O	sohB	Periplasmic serine protease	12	1242643;1242651;3.0;CAA;CAACAACAA**1242652;1242658;2.3;ATC;ATCATCA**1242685;1242697;2.2;CAACGC;CAACGCCAACGCC**1242880;1242891;2.0;CACATC;CACATCCACATC**1242947;1242956;2.0;ACCGA;ACCGAACCGA**1243032;1243043;2.0;CGACGG;CGACGGCGACGG**1243092;1243103;2.0;AACCGT;AACCGTAACCGT**1243314;1243332;3.2;CCTTTT;CCTTTTCCTTTTTCTTTTC**1243323;1243336;2.8;TTTTC;TTTTCTTTTCTTTT**1243333;1243340;8.0;T;TTTTTTTT**124332…
opr_634	orf_1436	1244974	1245429	-	X	-	Transposase and inactivated derivatives	2	1244979;1244985;7.0;T;TTTTTTT**1245393;1245401;3.0;ACA;ACAACAACA
	orf_1438	1245575	1245910	-	R	HI_1053	Uncharacterized conserved protein YurZ	2	1245695;1245710;5.3;GGC;GGCGGCGGCGGCGGCG**1245793;1245805;4.3;CGG;CGGCGGCGGCGGC
opr_635	orf_1439	1246039	1246944	+	K	-	Transcriptional regulator GlxA family	3	1246534;1246543;2.5;CCGT;CCGTCCGTCC**1246696;1246704;3.0;GCC;GCCGCCGCC**1246712;1246720;4.5;CG;CGCGCGCGC
opr_638	orf_1442	1248585	1249715	-	E	-	Spermidine/putrescine-binding periplasmic protein	3	1249175;1249186;2.0;GTTTGA;GTTTGAGTTTGA**1249621;1249632;2.0;GCCGGT;GCCGGTGCCGGT**1249672;1249678;2.3;AGC;AGCAGCA
opr_646	orf_1461	1267588	1268607	-	L	NicK	DNA relaxase NicK	5	1267673;1267678;3.0;AT;ATATAT**1267790;1267795;6.0;A;AAAAAA**1268189;1268196;2.7;TCT;TCTTCTTC**1268510;1268519;2.5;CGCC;CGCCCGCCCG**1268542;1268553;2.0;TCCGAA;TCCGAATCCGAA
	orf_1457	1266474	1266752	-	-	-	hypothetical protein	0	-
	orf_1458	1266759	1267043	-	-	-	hypothetical protein	0	-
	orf_1459	1267051	1267248	-	-	-	hypothetical protein	1	1267191;1267198;4.0;GA;GAGAGAGA
	orf_1460	1267253	1267543	-	-	-	hypothetical protein	1	1267400;1267407;2.7;AGT;AGTAGTAG
opr_652	orf_1471	1278233	1278790	-	C	-	Nitroreductase	1	1278324;1278336;2.2;TTATCC;TTATCCTTATCCT
	orf_1472	1278865	1280499	-	M	OPG	Phosphoethanolamine transferase for periplasmic glucans (OPG)	6	1279710;1279717;4.0;CG;CGCGCGCG**1279816;1279828;3.2;GCCG;GCCGGCCGGCCGG**1280149;1280156;4.0;GC;GCGCGCGC**1280160;1280168;3.0;CCG;CCGCCGCCG**1280321;1280328;8.0;A;AAAAAAAA**1280332;1280338;2.3;CAC;CACCACC
opr_655	orf_1480	1290230	1290856	+	U	YqfA	Predicted membrane channel-forming protein YqfA	3	1290283;1290291;3.0;GGC;GGCGGCGGC**1290297;1290310;2.3;TGATGC;TGATGCTGATGCTG**1290443;1290449;7.0;A;AAAAAAA
opr_656	orf_1481	1290921	1292339	-	E	-	Na+/alanine symporter	2	1291360;1291371;2.0;GCCGTA;GCCGTAGCCGTA**1291879;1291889;2.2;CGCGC;CGCGCCGCGCC
opr_661	orf_1487	1294963	1295487	-	K	lrp	DNA-binding transcriptional regulator	1	1294965;1294978;2.3;AATCCA;AATCCAAATCCAAA
opr_678	orf_1526	1327668	1330520	+	E	gcvP	Glycine cleavage system protein P (pyridoxal-binding)	7	1328110;1328121;4.0;CCG;CCGCCGCCGCCG**1328124;1328138;2.5;GCGATG;GCGATGGCGATGGCG**1328624;1328630;2.3;CCG;CCGCCGC**1328816;1328827;2.0;TACCGT;TACCGTTACCGT**1329492;1329504;4.3;GTC;GTCGTCGTCGTCG**1329543;1329554;2.0;AAAGCC;AAAGCCAAAGCC**1329779;1329791;4.3;CGG;CGGCGGCGGCGGC
	orf_1525	1327329	1327637	+	-	-	hypothetical protein	2	1327463;1327474;2.4;CTTGG;CTTGGCTTGGCT**1327500;1327508;3.0;GGC;GGCGGCGGC
	orf_1523	1326484	1327107	+	E	-	Lysophospholipase L1 or related esterase	2	1326500;1326507;2.7;TCC;TCCTCCTC**1327006;1327014;3.0;AAT;AATAATAAT
opr_679	orf_1527	1330628	1331221	-	X	-	Transposase	3	1331100;1331110;2.8;CCGG;CCGGCCGGCCG**1331163;1331169;7.0;T;TTTTTTT**1331170;1331175;3.0;GC;GCGCGC
opr_685	orf_1537	1341394	1342431	-	CHR	ddh	Lactate dehydrogenase or related 2-hydroxyacid dehydrogenase	6	1341555;1341562;2.7;CGT;CGTCGTCG**1341664;1341673;3.3;GGC;GGCGGCGGCG**1342166;1342176;2.2;CAACG;CAACGCAACGC**1342188;1342206;1.9;CGCCAATTTG;CGCCAATTTGCGCCAATTT**1342227;1342235;3.0;CGT;CGTCGTCGT**1342267;1342287;2.3;CGCCATTTT;CGCCATTTTCGCCGTTTTCGC
opr_688	orf_1551	1354647	1355396	-	IQ	-	3-oxoacyl-(acyl-carrier-protein) synthase	3	1354913;1354921;4.5;GC;GCGCGCGCG**1354964;1354977;2.3;CCAAAA;CCAAAACCAAAACC**1355287;1355294;2.7;CGG;CGGCGGCG
	orf_1549	1354016	1354333	-	S	-	Uncharacterized membrane protein	0	-
	orf_1548	1353494	1354009	-	S	-	Uncharacterized protein	2	1353914;1353922;3.0;TTC;TTCTTCTTC**1353935;1353946;2.0;ATAGGG;ATAGGGATAGGG
opr_690	orf_1557	1359153	1360217	+	M	-	Glycosyltransferase involved in cell wall bisynthesis	2	1359198;1359207;2.0;TGGGG;TGGGGTGGGG**1359686;1359692;7.0;T;TTTTTTT
opr_691	orf_1559	1361963	1362562	-	H	ApbE	Thiamine biosynthesis lipoprotein ApbE	2	1362085;1362091;2.3;CAT;CATCATC**1362249;1362256;2.7;TCG;TCGTCGTC
opr_694	orf_1565	1367159	1367308	+	P	-	receptor	0	-
opr_697	orf_1571	1374393	1374650	-	-	-	hypothetical protein	2	1374584;1374589;6.0;T;TTTTTT**1374622;1374631;2.5;TATT;TATTTATTTA
opr_698	orf_1572	1374937	1376505	+	H	AbgT	p-Aminobenzoyl-glutamate transporter AbgT	2	1375880;1375887;2.7;TTG;TTGTTGTT**1376307;1376314;2.7;GAT;GATGATGA
opr_699	orf_1574	1379885	1381294	-	S	-	Uncharacterized iron-regulated membrane protein	3	1380067;1380077;2.8;CGGA;CGGACGGACGG**1380562;1380572;2.2;GGTTC;GGTTCGGTTCG**1380742;1380750;3.0;GCA;GCAGCAGCA
opr_700	orf_1582	1387327	1387794	+	R	-	Predicted phosphohydrolase	2	1387347;1387357;2.2;GCAAA;GCAAAGCAAAG**1387483;1387491;3.0;GAA;GAAGAAGAA
opr_701	orf_1585	1389460	1390311	-	M	tonB	Periplasmic protein TonB	7	1389462;1389473;2.4;AATTC;AATTCAATTCAA**1389717;1389725;3.0;TGC;TGCTGCTGC**1389737;1389754;6.0;CCG;CCGCCGCCGCTGCCGCCG**1389968;1389981;2.3;GGTTCG;GGTTCGGGTTCGGG**1390027;1390038;2.0;ATCCGC;ATCCGCATCCGC**1390130;1390141;2.0;GCGCCT;GCGCCTGCGCCT**1390161;1390180;2.2;CGCCAAAAT;CGCCAAAATCGCCCAAATCG
opr_704	orf_1588	1392061	1394274	+	TK	-	(p)ppGpp synthase/hydrolase	6	1392255;1392265;2.2;CGGCG;CGGCGCGGCGC**1392303;1392309;2.3;CGC;CGCCGCC**1392868;1392874;7.0;A;AAAAAAA**1393263;1393272;3.3;CGC;CGCCGCCGCC**1393330;1393337;4.0;CT;CTCTCTCT**1393773;1393784;2.0;GCCCGT;GCCCGTGCCCGT
opr_711	orf_1607	1404921	1405862	-	-	-	hypothetical protein	9	1404933;1404942;3.3;GCG;GCGGCGGCGG**1404976;1404986;2.2;TTGTT;TTGTTTTGTTT**1405254;1405290;2.1;GACGGTGACGAATACGTC;GACGGTGCCGAATACGTCGACGGTTACGAATACGTCG**1405473;1405483;3.7;GGC;GGCGGCGGCGG**1405472;1405488;2.8;GGGCGG;GGGCGGCGGCGGGGGCG**1405535;1405543;3.0;TGG;TGGTGGTGG**1405602;1405609;2.7;GCC;GCCGCCGC**1405782;1405791;3.3;GCC;GCCGCCGCCG**1405842;1405850;3.0;GAG;GAGGAGGAG
	orf_1606	1403100	1404917	-	U	-	Large exoprotein involved in heme utilization or adhesion	3	1404046;1404052;7.0;T;TTTTTTT**1404084;1404090;2.3;GGC;GGCGGCG**1404608;1404621;2.3;CGTGTC;CGTGTCCGTGTCCG
opr_715	orf_1614	1410545	1411471	-	V	-	ABC-type multidrug transport system	3	1410702;1410720;1.9;AGCGGCTGCC;AGCGGCTGCCAGCGGCTGC**1410890;1410900;2.2;CGCGC;CGCGCCGCGCC**1411010;1411020;2.2;CAAGG;CAAGGCAAGGC
	orf_1615	1411499	1412077	-	P	NosD	Nitrous oxidase accessory protein NosD	3	1411639;1411646;2.7;CGC;CGCCGCCG**1411664;1411676;2.2;CTGCGC;CTGCGCCTGCGCC**1411726;1411733;4.0;GC;GCGCGCGC
	orf_1612	1409227	1409706	-	P	NosL	Nitrous oxide reductase accessory protein NosL	1	1409555;1409561;7.0;A;AAAAAAA
opr_717	orf_1621	1416313	1417452	-	K	-	Regulator of nitric oxide reductase transcription	2	1416411;1416418;2.7;CGA;CGACGACG**1417393;1417398;6.0;A;AAAAAA
opr_718	orf_1625	1420199	1421299	-	E	gcvT	Glycine cleavage system T protein (aminomethyltransferase)	4	1420316;1420327;2.0;GGCGAT;GGCGATGGCGAT**1420402;1420409;4.0;GC;GCGCGCGC**1420559;1420567;3.0;GTC;GTCGTCGTC**1420615;1420623;4.5;CG;CGCGCGCGC
opr_722	orf_1630	1423353	1423643	+	-	-	hypothetical protein	5	1423375;1423382;2.0;ATTT;ATTTATTT**1423381;1423392;2.0;TTTTCG;TTTTCGTTTTCG**1423398;1423406;2.2;TTAT;TTATTTATT**1423429;1423436;2.0;TAAA;TAAATAAA**1423438;1423445;2.0;TTAT;TTATTTAT
opr_724	orf_1633	1426044	1427387	+	C	nqrA	Na+-transporting NADH:ubiquinone oxidoreductase	5	1426304;1426313;2.5;TCAG;TCAGTCAGTC**1426537;1426545;3.0;TCA;TCATCATCA**1426551;1426557;2.3;GCC;GCCGCCG**1426715;1426722;2.0;CATT;CATTCATT**1427329;1427340;2.0;AATACG;AATACGAATACG
	orf_1634	1427390	1428622	+	C	nqrB	Na+-transporting NADH:ubiquinone oxidoreductase	1	1428376;1428382;2.3;CGG;CGGCGGC
	orf_1635	1428663	1429391	+	C	nqrC	Na+-transporting NADH:ubiquinone oxidoreductase	3	1428733;1428744;2.0;AAAAAC;AAAAACAAAAAC**1428892;1428899;4.0;GC;GCGCGCGC**1429194;1429199;6.0;A;AAAAAA
	orf_1636	1429391	1430017	+	C	nqrD	Na+-transporting NADH:ubiquinone oxidoreductase	2	1429821;1429827;2.3;TGC;TGCTGCT**1429829;1429835;2.3;GTC;GTCGTCG
	orf_1637	1430021	1430614	+	C	nqrE	Na+-transporting NADH:ubiquinone oxidoreductase	2	1430117;1430122;6.0;A;AAAAAA**1430184;1430191;2.0;CCAA;CCAACCAA
	orf_1638	1430628	1431845	+	C	nqrF	Na+-transporting NADH:ubiquinone oxidoreductase	2	1430872;1430883;4.0;GCG;GCGGCGGCGGCG**1431455;1431463;3.0;CGG;CGGCGGCGG
opr_726	orf_1640	1432361	1433416	+	H	apbE	Thiamine biosynthesis lipoprotein ApbE	3	1432529;1432540;2.4;CTCCC;CTCCCCTCCCCT**1433015;1433026;2.0;GGCAAA;GGCAAAGGCAAA**1433197;1433205;3.0;CAA;CAACAACAA
	orf_1641	1433442	1433657	+	S	HI_0173	Uncharacterized protein	4	1433565;1433571;7.0;A;AAAAAAA**1433574;1433585;2.0;TGCGAC;TGCGACTGCGAC**1433584;1433589;3.0;AC;ACACAC**1433605;1433611;7.0;A;AAAAAAA
opr_728	orf_1643	1434380	1434496	+	-	-	hypothetical protein	1	1434462;1434470;3.0;CCG;CCGCCGCCG
opr_731	orf_1652	1439071	1439343	+	-	-	hypothetical protein	0	-
opr_736	orf_1660	1447866	1448894	+	V	-	Uncharacterized protein involved in response to NO	5	1448031;1448044;2.0;TTGTTGC;TTGTTGCTTGTTGC**1448237;1448244;4.0;GC;GCGCGCGC**1448385;1448394;3.3;CTG;CTGCTGCTGC**1448396;1448406;3.7;CGC;CGCCGCCGCCG**1448815;1448823;3.0;CCG;CCGCCGCCG
opr_740	orf_1665	1455576	1455965	+	NW	PilE	Tfp pilus assembly protein PilE	1	1455792;1455803;2.4;AAACA;AAACAAAACAAA
opr_749	orf_1675	1465843	1466340	+	-	-	hypothetical protein	1	1466133;1466145;2.2;CAAAGC;CAAAGCCAAAGCC
opr_755	orf_1692	1479538	1480761	-	P	ClcA	H+/Cl- antiporter ClcA	7	1479597;1479606;3.3;GCA;GCAGCAGCAG**1479693;1479699;2.3;CGA;CGACGAC**1479743;1479753;3.7;GCG;GCGGCGGCGGC**1480207;1480213;2.3;CTG;CTGCTGC**1480453;1480459;2.3;CGT;CGTCGTC**1480543;1480551;3.0;GCC;GCCGCCGCC**1480652;1480672;3.0;CCGTATG;CCGTATGCCGTATGCCGTATG
opr_756	orf_1695	1481947	1483485	+	C	pntA	NAD/NADP transhydrogenase alpha subunit	8	1482555;1482565;2.2;AATCG;AATCGAATCGA**1482607;1482617;3.7;GGC;GGCGGCGGCGG**1482699;1482709;3.7;CAT;CATCATCATCA**1482708;1482714;2.3;CAC;CACCACC**1482713;1482720;2.7;CCG;CCGCCGCC**1483163;1483170;2.7;CCG;CCGCCGCC**1483340;1483348;3.0;TCG;TCGTCGTCG**1483353;1483360;2.7;GCT;GCTGCTGC
	orf_1697	1483952	1485337	+	C	pntB	NAD/NADP transhydrogenase beta subunit	1	1484398;1484407;3.3;CAG;CAGCAGCAGC
	orf_1696	1483489	1483872	+	S	-	Uncharacterized conserved protein	3	1483555;1483560;6.0;A;AAAAAA**1483681;1483690;3.3;GCC;GCCGCCGCCG**1483823;1483832;2.5;GGGC;GGGCGGGCGG
opr_757	orf_1699	1485545	1486000	-	R	mdaB	Putative NADPH-quinone reductase (modulator of drug activity B)	2	1485887;1485892;3.0;TT;TTTTTT**1485943;1485952;2.5;CATC;CATCCATCCA
opr_758	orf_1701	1486362	1487273	+	K	yafC	DNA-binding transcriptional regulator	3	1486566;1486572;3.5;CG;CGCGCGC**1487068;1487077;2.5;TTGC;TTGCTTGCTT**1487222;1487227;6.0;T;TTTTTT
opr_761	orf_1714	1493716	1494858	-	H	bioF	7-keto-8-aminopelargonate synthetase or related enzyme	5	1493979;1493988;2.5;TTCT;TTCTTTCTTT**1494011;1494022;2.4;AAAAT;AAAATAAAATAA**1494274;1494280;7.0;T;TTTTTTT**1494371;1494377;7.0;T;TTTTTTT**1494498;1494508;3.7;TCG;TCGTCGTCGTC
	orf_1712	1492289	1492951	-	QR	bioC	SAM-dependent methyltransferase	2	1492322;1492327;3.0;AA;AAAAAA**1492422;1492428;7.0;T;TTTTTTT
	orf_1713	1493059	1493706	-	S	HI_1552	Uncharacterized protein	2	1493291;1493298;2.0;CGGG;CGGGCGGG**1493548;1493559;2.0;AAAATC;AAAATCAAAATC
opr_763	orf_1718	1496361	1497827	-	G	-	Di- and tricarboxylate transporter	7	1496666;1496674;2.2;AAGC;AAGCAAGCA**1496864;1496875;2.0;AAAGCA;AAAGCAAAAGCA**1496893;1496907;2.5;GCGGTG;GCGGTGGCGGTGGCG**1497142;1497157;2.7;GCCCAC;GCCCACGCCCACGCCC**1497369;1497379;3.7;GCC;GCCGCCGCCGC**1497377;1497384;4.0;CG;CGCGCGCG**1497408;1497416;3.0;CAG;CAGCAGCAG
opr_764	orf_1719	1498025	1498948	-	E	speB	Arginase family enzyme	1	1498403;1498412;2.0;ACGGG;ACGGGACGGG
	orf_1720	1499047	1500939	-	E	speA	Arginine decarboxylase (spermidine biosynthesis)	9	1499258;1499266;3.0;ACA;ACAACAACA**1499270;1499281;2.0;GCAGTG;GCAGTGGCAGTG**1499335;1499340;6.0;A;AAAAAA**1499357;1499364;2.7;TCT;TCTTCTTC**1499374;1499385;2.0;AGGCAT;AGGCATAGGCAT**1499398;1499410;2.2;GCCGTC;GCCGTCGCCGTCG**1499460;1499471;2.4;CGGCG;CGGCGCGGCGCG**1500242;1500248;7.0;T;TTTTTTT**1500748;1500763;3.2;AAAAC;AAAACAAAACAAAACA
	orf_1721	1501106	1501459	-	-	-	hypothetical protein	3	1501186;1501197;2.0;CTTCCA;CTTCCACTTCCA**1501384;1501395;2.0;TTTTCA;TTTTCATTTTCA**1501400;1501406;7.0;T;TTTTTTT
opr_765	orf_1724	1504109	1504228	+	-	-	hypothetical protein	2	1504182;1504192;2.2;CCCGC;CCCGCCCCGCC**1504212;1504222;2.2;ACGGC;ACGGCACGGCA
opr_770	orf_1733	1508971	1511715	-	P	tbp1	Outer membrane receptor for ferrienterochelin and colicins	7	1509419;1509432;2.3;CGGACA;CGGACACGGACACG**1509721;1509731;2.2;TTTTA;TTTTATTTTAT**1509850;1509860;2.2;GGTGC;GGTGCGGTGCG**1510110;1510116;7.0;T;TTTTTTT**1510168;1510178;3.7;ATA;ATAATAATAAT**1511155;1511164;2.5;CTGC;CTGCCTGCCT**1511702;1511713;2.0;TGTTGC;TGTTGCTGTTGC
opr_783	orf_1761	1532049	1532894	-	R	-	Predicted amidohydrolase	5	1532139;1532151;2.2;GCCTTC;GCCTTCGCCTTCG**1532239;1532247;3.0;GCC;GCCGCCGCC**1532275;1532283;4.5;CG;CGCGCGCGC**1532282;1532292;3.7;GCA;GCAGCAGCAGC**1532738;1532746;3.0;GCA;GCAGCAGCA
opr_784	orf_1762	1532925	1533818	+	E	-	Prephenate dehydrogenase	3	1532995;1533006;3.0;GTTC;GTTCGTTCGTTC**1533385;1533393;3.0;TCA;TCATCATCA**1533401;1533408;2.7;CGG;CGGCGGCG
opr_787	orf_1766	1535440	1535553	-	-	-	hypothetical protein	0	-
opr_788	orf_1769	1538464	1539078	-	C	prpF	2-Methylaconitate cis-trans-isomerase PrpF (2-methyl citrate pathway)	6	1538664;1538677;4.7;CGG;CGGCGGCGGCGGCG**1538793;1538801;3.0;CGG;CGGCGGCGG**1538827;1538835;4.5;GC;GCGCGCGCG**1538833;1538840;2.0;GCGG;GCGGGCGG**1538836;1538844;3.0;GGC;GGCGGCGGC**1538926;1538932;2.3;GTT;GTTGTTG
opr_789	orf_1775	1545034	1545912	-	G	prpB	2-Methylisocitrate lyase and related enzymes	3	1545126;1545133;2.7;CCG;CCGCCGCC**1545690;1545703;2.0;TGCGTCG;TGCGTCGTGCGTCG**1545765;1545775;3.7;CGC;CGCCGCCGCCG
	orf_1771	1540179	1542098	-	C	acnD	Aconitase A	2	1541512;1541520;3.0;GCG;GCGGCGGCG**1541705;1541715;2.2;TCAAA;TCAAATCAAAT
	orf_1774	1543801	1544949	-	C	prpC	Citrate synthase	1	1544010;1544016;7.0;T;TTTTTTT
opr_790	orf_1776	1546017	1546145	+	-	-	hypothetical protein	0	-
opr_792	orf_1788	1559685	1559861	-	-	-	hypothetical protein	2	1559739;1559747;3.0;GCC;GCCGCCGCC**1559841;1559847;7.0;A;AAAAAAA
	orf_1790	1561347	1562993	-	M	-	Phosphoethanolamine transferase for periplasmic glucans (OPG)	6	1561350;1561355;6.0;T;TTTTTT**1561725;1561732;2.0;TTCA;TTCATTCA**1562340;1562346;7.0;T;TTTTTTT**1562346;1562352;2.3;TGC;TGCTGCT**1562812;1562822;3.7;AAT;AATAATAATAA**1562909;1562918;2.0;CAAAA;CAAAACAAAA
opr_802	orf_1818	1585277	1586212	-	H	-	Nicotinate-nucleotide pyrophosphorylase	5	1585434;1585441;4.0;TG;TGTGTGTG**1585678;1585687;3.3;CGC;CGCCGCCGCC**1585683;1585692;2.5;CCGC;CCGCCCGCCC**1585788;1585802;2.5;GCGGTG;GCGGTGGCGGTGGCG**1586047;1586055;3.0;CGG;CGGCGGCGG
	orf_1819	1586234	1587172	-	S	-	Uncharacterized conserved protein	4	1586380;1586387;2.7;GGC;GGCGGCGG**1586435;1586446;2.0;TTGCAG;TTGCAGTTGCAG**1586572;1586583;2.0;CGAAGT;CGAAGTCGAAGT**1587147;1587159;2.2;GCTTCG;GCTTCGGCTTCGG
opr_803	orf_1821	1588538	1590046	+	H	nadB	Aspartate oxidase	7	1588685;1588693;3.0;GCG;GCGGCGGCG**1589099;1589107;3.0;GGC;GGCGGCGGC**1589127;1589136;3.3;CCA;CCACCACCAC**1589122;1589128;2.3;CGC;CGCCGCC**1589158;1589169;2.0;CGCCAT;CGCCATCGCCAT**1589342;1589351;2.0;CGCCG;CGCCGCGCCG**1589474;1589483;2.5;TCCA;TCCATCCATC
	orf_1820	1587317	1588486	+	H	nadA	Quinolinate synthase	5	1587381;1587394;2.0;CCGCCGC;CCGCCGCCCGCCGC**1587381;1587388;2.7;CCG;CCGCCGCC**1587666;1587674;3.0;TGG;TGGTGGTGG**1587678;1587685;2.0;GCGT;GCGTGCGT**1588182;1588189;8.0;A;AAAAAAAA
opr_804	orf_1826	1592621	1593787	-	G	mdxK	Trehalose and maltose hydrolase (possible phosphorylase)	1	1592659;1592665;2.3;GCA;GCAGCAG
opr_805	orf_1827	1593970	1594239	-	G	-	Galactose mutarotase or related enzyme	0	-
	orf_1828	1594253	1594540	-	G	-	Galactose mutarotase or related enzyme	1	1594288;1594294;2.3;CGG;CGGCGGC
opr_807	orf_1831	1595352	1595978	-	G	-	Na+/melibiose symporter or related transporter	1	1595357;1595364;2.7;CCG;CCGCCGCC
opr_812	orf_1839	1601394	1601534	-	-	-	hypothetical protein	1	1601408;1601413;6.0;T;TTTTTT
opr_817	orf_1846	1608255	1609196	+	-	-	hypothetical protein	9	1608267;1608275;3.0;CTC;CTCCTCCTC**1608326;1608335;3.3;CGG;CGGCGGCGGC**1608520;1608527;2.7;ACA;ACAACAAC**1608574;1608582;3.0;CCA;CCACCACCA**1608634;1608644;3.7;CCG;CCGCCGCCGCC**1608827;1608863;2.1;CGACGTATTCGGAACCGT;CGACGTATTCGTAACCGTCGACGTATTCGGCACCGTC**1609131;1609141;2.2;AAACA;AAACAAAACAA**1609175;1609184;3.3;CCG;CCGCCGCCGC**1609187;1609193;2.3;AGG;AGGAGGA
	orf_1847	1609200	1610654	+	U	-	Large exoprotein involved in heme utilization or adhesion	6	1609496;1609509;2.3;CGGACA;CGGACACGGACACG**1610036;1610042;2.3;CGG;CGGCGGC**1610065;1610071;7.0;A;AAAAAAA**1610074;1610079;3.0;CG;CGCGCG**1610478;1610489;2.0;ATGACA;ATGACAATGACA**1610535;1610543;3.0;GCT;GCTGCTGCT
opr_828	orf_1862	1616279	1617412	+	-	-	hypothetical protein	2	1616285;1616290;6.0;A;AAAAAA**1617130;1617136;7.0;A;AAAAAAA
opr_833	orf_1876	1628035	1628169	+	-	-	hypothetical protein	0	-
opr_850	orf_1914	1653015	1653293	-	-	-	hypothetical protein	0	-
	orf_1915	1653300	1653518	-	-	-	hypothetical protein	0	-
opr_859	orf_1933	1668683	1669537	-	S	hag1	Uncharacterized protein/domain	5	1668896;1668905;2.5;CCCG;CCCGCCCGCC**1668901;1668909;3.0;CCG;CCGCCGCCG**1669007;1669016;3.3;GGC;GGCGGCGGCG**1669187;1669196;2.0;CGGTA;CGGTACGGTA**1669509;1669519;2.2;AAACA;AAACAAAACAA
opr_875	orf_1963	1689922	1690098	+	-	-	hypothetical protein	1	1690076;1690087;2.0;TTCAAA;TTCAAATTCAAA
opr_879	orf_1974	1700593	1701039	-	S	NGK_2061	Uncharacterized membrane protein	2	1700938;1700945;2.7;CAG;CAGCAGCA**1700972;1700980;3.0;TTG;TTGTTGTTG
opr_881	orf_1983	1704946	1705110	-	-	-	hypothetical protein	0	-
	orf_1984	1705124	1706647	-	G	emrB	Predicted arabinose efflux permease	4	1705134;1705143;3.3;CCG;CCGCCGCCGC**1705459;1705468;3.3;CGG;CGGCGGCGGC**1706228;1706239;2.0;TGCCAG;TGCCAGTGCCAG**1706389;1706403;5.0;CGG;CGGCGGCGGCGGCGG
opr_885	orf_1990	1712236	1713645	-	R	NMB0313	Putative Zn-dependent protease	6	1712953;1712958;6.0;T;TTTTTT**1713025;1713033;3.0;CTG;CTGCTGCTG**1713188;1713196;3.0;GCC;GCCGCCGCC**1713221;1713229;3.0;GCC;GCCGCCGCC**1713244;1713251;2.0;GGCG;GGCGGGCG**1713636;1713644;3.0;GCA;GCAGCAGCA
opr_890	orf_1995	1715406	1715651	-	-	-	hypothetical protein	3	1715459;1715465;7.0;A;AAAAAAA**1715474;1715479;6.0;T;TTTTTT**1715549;1715558;3.3;CTT;CTTCTTCTTC
opr_904	orf_2015	1731417	1731815	-	S	YphA	Uncharacterized membrane protein YphA	0	-
opr_907	orf_2020	1737239	1737787	-	M	OagA	Peptidoglycan/LPS O-acetylase OafA/YrhL	1	1737709;1737720;2.0;CGGCTT;CGGCTTCGGCTT
	orf_2021	1737889	1739091	-	M	OafA	Peptidoglycan/LPS O-acetylase OafA/YrhL	3	1738141;1738152;2.4;TGTAA;TGTAATGTAATG**1738754;1738760;7.0;A;AAAAAAA**1738901;1738912;2.0;AAAGAA;AAAGAAAAAGAA
opr_912	orf_2030	1748398	1749096	-	O	-	Protein-disulfide isomerase	4	1748561;1748568;4.0;GC;GCGCGCGC**1748742;1748752;3.7;CGG;CGGCGGCGGCG**1748907;1748917;2.8;TGCC;TGCCTGCCTGC**1748977;1748985;3.0;GGC;GGCGGCGGC
opr_917	orf_2044	1761734	1761871	+	-	-	hypothetical protein	1	1761747;1761757;2.2;GCGGC;GCGGCGCGGCG
	orf_2042	1760742	1761068	+	S	YkoI	Uncharacterized membrane protein YkoI	3	1760767;1760776;3.3;CCG;CCGCCGCCGC**1760956;1760964;3.0;ACG;ACGACGACG**1761059;1761065;2.3;CGA;CGACGAC
opr_927	orf_2072	1784201	1785079	-	R	-	Predicted spermidine synthase with an N-terminal membrane domain	0	-
opr_928	orf_2073	1785675	1786310	-	R	-	Predicted spermidine synthase with an N-terminal membrane domain	6	1785774;1785779;6.0;A;AAAAAA**1785794;1785803;3.3;CGG;CGGCGGCGGC**1785885;1785891;7.0;A;AAAAAAA**1785899;1785910;2.0;GCAAGG;GCAAGGGCAAGG**1785963;1785969;2.3;GAT;GATGATG**1786295;1786308;2.0;TATTTTC;TATTTTCTATTTTC
opr_935	orf_2082	1793896	1794369	-	S	-	Uncharacterized protein	1	1793906;1793914;3.0;CCG;CCGCCGCCG
opr_940	orf_2089	1799506	1800543	+	M	-	UDP-N-acetylglucosamine:LPS N-acetylglucosamine transferase	2	1799653;1799659;7.0;A;AAAAAAA**1800078;1800085;2.7;GGC;GGCGGCGG
opr_943	orf_2095	1804384	1804740	+	P	mntP	Putative Mn2+ efflux pump MntP	1	1804573;1804582;3.3;GCC;GCCGCCGCCG
opr_946	orf_2099	1808830	1809702	-	M	-	Small-conductance mechanosensitive channel	5	1808965;1808972;2.7;GTC;GTCGTCGT**1809423;1809433;3.7;CCG;CCGCCGCCGCC**1809422;1809438;2.8;ACCGCC;ACCGCCGCCGCCACCGC**1809599;1809606;4.0;GC;GCGCGCGC**1809624;1809631;2.7;CCG;CCGCCGCC
opr_947	orf_2101	1812424	1813842	+	E	sdaA	L-serine deaminase	7	1812529;1812540;4.0;GCC;GCCGCCGCCGCC**1812879;1812888;3.3;CGG;CGGCGGCGGC**1812901;1812908;2.7;GAA;GAAGAAGA**1812923;1812934;2.0;CGGAAA;CGGAAACGGAAA**1812942;1812953;2.0;TCCTTA;TCCTTATCCTTA**1813062;1813071;3.3;CCG;CCGCCGCCGC**1813155;1813164;3.3;CCG;CCGCCGCCGC
opr_953	orf_2109	1819508	1820233	-	O	aat	Leu/Phe-tRNA-protein transferase	1	1820062;1820068;7.0;A;AAAAAAA
opr_961	orf_2126	1836963	1838090	+	S	YccC	Uncharacterized membrane protein YccC	6	1837021;1837032;2.0;ACCGCC;ACCGCCACCGCC**1837445;1837456;2.0;CGCCAT;CGCCATCGCCAT**1837458;1837466;3.0;GCC;GCCGCCGCC**1837470;1837476;2.3;CTG;CTGCTGC**1837874;1837886;2.2;CCGCAT;CCGCATCCGCATC**1838015;1838021;2.3;CCG;CCGCCGC
opr_964	orf_2142	1853154	1854413	+	E	dadA	Glycine/D-amino acid oxidase (deaminating)	1	1854087;1854102;2.0;GGCGGAAT;GGCGGAATGGCGGAAT
	orf_2141	1851684	1853075	+	E	HI_0883	Na+/alanine symporter	2	1852002;1852013;2.0;TGGATG;TGGATGTGGATG**1852714;1852725;2.4;GCGGC;GCGGCGCGGCGC
opr_974	orf_2166	1875678	1876511	-	J	rplB	Ribosomal protein L2	3	1875806;1875816;3.7;CAC;CACCACCACCA**1875899;1875905;7.0;T;TTTTTTT**1876359;1876365;2.3;GGT;GGTGGTG
	orf_2167	1876517	1876801	-	J	rplW	Ribosomal protein L23	2	1876528;1876540;2.2;CTGCAG;CTGCAGCTGCAGC**1876685;1876691;2.3;CAG;CAGCAGC
	orf_2165	1875394	1875630	-	J	rpsS	Ribosomal protein S19	0	-
opr_986	orf_2191	1901381	1901719	-	J	MBF1	Archaeal ribosome-binding protein aMBF1	1	1901544;1901554;3.7;CCG;CCGCCGCCGCC
	orf_2189	1900335	1900586	-	C	fdx	Ferredoxin	0	-
opr_990	orf_2206	1916608	1917252	-	-	-	hypothetical protein	1	1916882;1916890;3.0;TCG;TCGTCGTCG
opr_999	orf_2218	1926145	1926342	-	-	-	Lambda repressor-like, DNA-binding domain	0	-
opr_1004	orf_2232	1938008	1938565	+	M	rfbC	dTDP-4-dehydrorhamnose 3	2	1938079;1938085;7.0;T;TTTTTTT**1938153;1938164;2.0;ACTCCA;ACTCCAACTCCA
	orf_2229	1934769	1935857	+	M	galE	UDP-glucose 4-epimerase	1	1935174;1935182;4.5;GC;GCGCGCGCG
opr_1005	orf_2233	1938609	1940627	-	S	HI_0561	Uncharacterized membrane protein	4	1939016;1939024;3.0;CGA;CGACGACGA**1939521;1939530;3.3;GGC;GGCGGCGGCG**1939907;1939917;2.2;ACGGC;ACGGCACGGCA**1940471;1940479;3.0;CCG;CCGCCGCCG
opr_1012	orf_2243	1950691	1951098	-	-	-	hypothetical protein	0	-
opr_1015	orf_2249	1958027	1961074	-	NW	-	Tfp pilus assembly protein	14	1958029;1958037;3.0;AGA;AGAAGAAGA**1958197;1958210;2.0;CGCCGTC;CGCCGTCCGCCGTC**1958399;1958406;4.0;GC;GCGCGCGC**1958697;1958704;2.7;TCG;TCGTCGTC**1959173;1959184;2.0;TTCCAC;TTCCACTTCCAC**1959189;1959220;3.6;TTTTTGCCG;TTTTTGCCGTTTTTGCCGTTTTTGCCGTTTTT**1959535;1959541;7.0;T;TTTTTTT**1959684;1959693;2.5;TTAA;TTAATTAATT**1959690;1959701;2.0;AATTTA;AATTTAAATTTA**1959733;1959741;3.0;GCA;GCAGCAGCA**1959…
opr_1016	orf_2253	1965604	1966578	+	P	alx	Membrane protein TerC	3	1965647;1965654;8.0;T;TTTTTTTT**1965781;1965789;2.2;GGCT;GGCTGGCTG**1966216;1966222;7.0;A;AAAAAAA
opr_1021	orf_2264	1974764	1975159	+	-	-	hypothetical protein	2	1974821;1974827;7.0;A;AAAAAAA**1974925;1974936;2.0;GCAAAA;GCAAAAGCAAAA
	orf_2265	1975163	1975654	+	R	YhbS	Predicted N-acetyltransferase YhbS	0	-
opr_1023	orf_2268	1978955	1979959	+	G	gap	Glyceraldehyde-3-phosphate dehydrogenase/erythrose-4-phosphate dehydrogenase	6	1979073;1979081;3.0;TGC;TGCTGCTGC**1979292;1979299;4.0;GC;GCGCGCGC**1979408;1979414;2.3;ACC;ACCACCA**1979542;1979559;3.4;GCGCC;GCGCCGCGCCCGCGCCGC**1979545;1979557;2.2;CCGCGC;CCGCGCCCGCGCC**1979554;1979562;3.0;CGC;CGCCGCCGC
opr_1029	orf_2278	1987936	1988451	+	S	YsdA	Uncharacterized membrane protein YsdA	3	1987962;1987967;6.0;A;AAAAAA**1987968;1987973;6.0;T;TTTTTT**1988283;1988295;2.2;TCTGTA;TCTGTATCTGTAT
opr_1031	orf_2280	1989275	1989454	-	-	-	Putative zinc-finger	1	1989369;1989376;4.0;AT;ATATATAT
	orf_2284	1991765	1992073	-	S	-	Uncharacterized low-complexity protein	4	1991775;1991804;2.0;CCGCATTTGCCTTCG;CCGCATTTGCCTTCGCCGCATTTGCCTTCG**1991810;1991824;2.5;TTTGGC;TTTGGCTTTGGCTTT**1991849;1991855;7.0;T;TTTTTTT**1992001;1992007;2.3;CGG;CGGCGGC
opr_1034	orf_2291	1995812	1997269	-	E	-	Dipeptide/tripeptide permease	6	1995851;1995862;2.0;GAGCAG;GAGCAGGAGCAG**1996434;1996440;2.3;TTG;TTGTTGT**1996637;1996648;2.4;GGTGG;GGTGGGGTGGGG**1996699;1996708;3.3;CCG;CCGCCGCCGC**1996882;1996890;3.0;CGC;CGCCGCCGC**1997236;1997241;6.0;T;TTTTTT
opr_1039	orf_2299	2005897	2007153	+	-	PagP	outer membrane enzyme PagP	5	2006029;2006040;2.4;AAAGA;AAAGAAAAGAAA**2006034;2006042;2.2;AAAG;AAAGAAAGA**2006053;2006060;2.0;GCGG;GCGGGCGG**2006286;2006297;2.0;CCCTGC;CCCTGCCCCTGC**2006558;2006565;2.0;TTAT;TTATTTAT
opr_1040	orf_2301	2007657	2007824	-	-	-	hypothetical protein	3	2007729;2007736;2.7;GAT;GATGATGA**2007787;2007797;2.2;AGAAA;AGAAAAGAAAA**2007813;2007823;3.7;CAG;CAGCAGCAGCA
opr_1044	orf_2308	2013729	2014019	-	-	DMP12	DNA-mimic protein DMP12	1	2013749;2013754;6.0;T;TTTTTT
opr_1046	orf_2312	2016938	2017810	-	S	-	mafB silent cassette	1	2017443;2017454;2.0;GCTGTT;GCTGTTGCTGTT
	orf_2315	2018534	2020030	-	S	-	mafB silent cassette	6	2018572;2018577;6.0;T;TTTTTT**2018639;2018646;8.0;T;TTTTTTTT**2018781;2018788;8.0;T;TTTTTTTT**2018978;2018983;6.0;T;TTTTTT**2019355;2019361;2.3;CAT;CATCATC**2019667;2019675;3.0;CGC;CGCCGCCGC
opr_1048	orf_2317	2020649	2022214	-	S	-	mafB silent cassette	3	2020958;2020965;8.0;T;TTTTTTTT**2021539;2021545;2.3;CAT;CATCATC**2021851;2021859;3.0;CGC;CGCCGCCGC
opr_1050	orf_2324	2027153	2027710	+	JO	-	Protein N-acetyltransferase	1	2027302;2027315;2.0;GCGTTTG;GCGTTTGGCGTTTG
opr_1051	orf_2325	2028094	2029560	+	G	mqo	L-2-hydroxyglutarate oxidase LhgO	7	2028124;2028132;3.0;GGC;GGCGGCGGC**2028319;2028326;4.0;GC;GCGCGCGC**2028795;2028807;2.2;CTTCCT;CTTCCTCTTCCTC**2028814;2028823;3.3;GGC;GGCGGCGGCG**2028832;2028838;2.3;CTG;CTGCTGC**2029285;2029290;6.0;A;AAAAAA**2029349;2029358;2.5;GCTC;GCTCGCTCGC
opr_1052	orf_2329	2031573	2032223	-	S	OsmY	Osmotically-inducible protein OsmY	4	2031646;2031683;2.1;TTTTCTTTGGGCGTTTCT;TTTTCTTTGGGCGTTTCTTTTTCTTTGGGTGTTTCTTT**2031659;2031671;2.2;TTTCTT;TTTCTTTTTCTTT**2031927;2031935;3.0;GTG;GTGGTGGTG**2032155;2032161;7.0;T;TTTTTTT
opr_1054	orf_2334	2034805	2035335	-	C	-	Cytochrome b561	4	2034859;2034867;3.0;GAC;GACGACGAC**2034888;2034894;2.3;CGG;CGGCGGC**2034898;2034904;2.3;CAG;CAGCAGC**2035080;2035092;2.2;CTGCCG;CTGCCGCTGCCGC
opr_1055	orf_2341	2041210	2041536	+	-	-	hypothetical protein	1	2041440;2041446;2.3;GGT;GGTGGTG
opr_1057	orf_2344	2043459	2044040	+	S	YckC	Uncharacterized membrane protein YckC	1	2043466;2043472;7.0;A;AAAAAAA
opr_1062	orf_2357	2052843	2054069	-	F	-	Purine-cytosine permease or related protein	8	2052872;2052878;7.0;T;TTTTTTT**2052902;2052913;2.0;TGGCAA;TGGCAATGGCAA**2053354;2053362;3.0;GCC;GCCGCCGCC**2053597;2053612;5.3;AGC;AGCAGCATCAGCAGCA**2053597;2053614;2.0;AGCAGCATC;AGCAGCATCAGCAGCATC**2053640;2053647;2.0;TGCG;TGCGTGCG**2053904;2053909;3.0;GC;GCGCGC**2054050;2054056;2.3;GAG;GAGGAGG
opr_1065	orf_2369	2063231	2065933	+	C	ppc	Phosphoenolpyruvate carboxylase	9	2063498;2063507;3.3;CGC;CGCCGCCGCC**2063704;2063711;2.7;GCT;GCTGCTGC**2063839;2063845;2.3;CAA;CAACAAC**2063974;2063981;2.7;CGG;CGGCGGCG**2064126;2064134;3.0;ACG;ACGACGACG**2064218;2064225;4.0;GC;GCGCGCGC**2064239;2064248;2.5;CGCT;CGCTCGCTCG**2064395;2064407;2.2;TCCGTG;TCCGTGTCCGTGT**2065056;2065066;3.7;GCG;GCGGCGGCGGC
opr_1072	orf_2384	2077606	2078430	+	L	-	ATP-dependent DNA ligase	6	2077623;2077629;2.3;CGG;CGGCGGC**2078192;2078201;3.3;ACG;ACGACGACGA**2078291;2078303;2.2;GCATCG;GCATCGGCATCGG**2078307;2078319;2.2;CAAAGA;CAAAGACAAAGAC**2078355;2078366;2.0;CTACCG;CTACCGCTACCG**2078419;2078426;2.0;ACCG;ACCGACCG
	orf_2385	2078460	2079062	+	F	-	Hypoxanthine-guanine phosphoribosyltransferase	2	2078657;2078667;2.2;GGGCG;GGGCGGGGCGG**2079016;2079022;2.3;GCT;GCTGCTG
opr_1086	orf_2410	2101464	2102177	-	GR	-	Beta-phosphoglucomutase or related phosphatase	0	-
opr_1095	orf_2427	2115791	2117032	-	E	mtr	Amino acid permease	2	2115956;2115962;2.3;GAT;GATGATG**2116507;2116516;2.5;GGAC;GGACGGACGG
opr_1097	orf_2430	2119052	2119570	-	G	-	Gluconate kinase	2	2119139;2119150;2.0;TTCGCC;TTCGCCTTCGCC**2119529;2119540;2.0;GCCGCA;GCCGCAGCCGCA
	orf_2431	2119590	2120975	-	GR	-	H+/gluconate symporter or related permease	4	2119799;2119808;3.3;CGG;CGGCGGCGGC**2120321;2120333;2.2;CGGGAA;CGGGAACGGGAAC**2120759;2120766;2.7;CGC;CGCCGCCG**2120917;2120926;3.3;GCC;GCCGCCGCCG
opr_1101	orf_2442	2129050	2129808	-	P	-	ABC-type enterochelin transport system	3	2129093;2129105;2.2;ACGTCC;ACGTCCACGTCCA**2129206;2129214;3.0;GGC;GGCGGCGGC**2129380;2129391;2.0;GCGTTG;GCGTTGGCGTTG
	orf_2444	2130563	2131510	-	P	-	ABC-type enterochelin transport system	3	2130717;2130724;2.0;CGGA;CGGACGGA**2130804;2130815;2.0;GTCGCC;GTCGCCGTCGCC**2131157;2131166;3.3;CAG;CAGCAGCAGC
	orf_2445	2131527	2132441	-	P	-	ABC-type enterochelin transport system	5	2131684;2131693;2.5;GCAG;GCAGGCAGGC**2132094;2132109;5.0;CGG;CGGCGGCAGGCGGCGG**2132112;2132119;2.7;CAG;CAGCAGCA**2132189;2132198;3.3;GCA;GCAGCAGCAG**2132294;2132305;2.0;CCGCCA;CCGCCACCGCCA
	orf_2447	2132723	2133688	-	P	-	ABC-type enterochelin transport system	5	2132782;2132789;2.7;CGC;CGCCGCCG**2133096;2133102;2.3;ACC;ACCACCA**2133105;2133120;2.7;CCTTTG;CCTTTGCCTTTGCCTT**2133320;2133330;3.7;GAT;GATGATGATGA**2133538;2133545;4.0;CG;CGCGCGCG
	orf_2443	2129892	2130518	-	C	-	Formylmethanofuran dehydrogenase subunit E	1	2129993;2130005;2.2;TTGCGC;TTGCGCTTGCGCT
opr_1104	orf_2452	2139181	2140767	+	R	HI_0736	Na+-dependent transporter	11	2139357;2139367;3.7;CGG;CGGCGGCGGCG**2139414;2139425;4.0;GCT;GCTGCTGCTGCT**2139597;2139603;2.3;CGC;CGCCGCC**2139763;2139770;4.0;GC;GCGCGCGC**2139988;2139994;7.0;A;AAAAAAA**2140035;2140041;2.3;CAG;CAGCAGC**2140452;2140461;3.3;CAT;CATCATCATC**2140461;2140467;2.3;CGG;CGGCGGC**2140601;2140607;7.0;A;AAAAAAA**2140680;2140689;3.3;GCT;GCTGCTGCTG**2140733;2140745;2.2;ACGAAC;ACGAACACGAACA
opr_1110	orf_2461	2147797	2148492	+	K	-	Fic family protein	0	-
opr_1111	orf_2462	2148732	2153138	-	MU	hap	Type V secretory pathway	15	2148792;2148800;3.0;GGC;GGCGGCGGC**2149167;2149176;3.3;GCG;GCGGCGGCGG**2149219;2149231;2.2;CCCGCG;CCCGCGCCCGCGC**2149595;2149628;2.8;GCTGCGGTTGGG;GCTGCGGTTGGGGTTGCGGTTGGGGCTGCGGTTG**2149597;2149631;5.8;TGCGGT;TGCGGTTGGGGTTGCGGTTGGGGCTGCGGTTGCGG**2149639;2149659;2.3;CGGCGGGCG;CGGCGGGCGCGGCGGGCGCGG**2149640;2149656;4.0;GGCG;GGCGGGCGCGGCGGGCG**2149665;2149673;3.0;GGT;GGTGGTGGT**2149779;2149789;2.8;G…
opr_1117	orf_2470	2159583	2161214	+	H	-	Outer membrane cobalamin receptor protein	7	2159641;2159650;3.3;GCC;GCCGCCGCCG**2159722;2159728;3.5;TG;TGTGTGT**2159781;2159789;3.0;GCG;GCGGCGGCG**2160128;2160138;3.7;GGC;GGCGGCGGCGG**2160240;2160246;7.0;A;AAAAAAA**2160339;2160347;3.0;GGC;GGCGGCGGC**2160877;2160890;2.0;CGAAACG;CGAAACGCGAAACG
opr_1122	orf_2475	2165951	2166718	-	K	-	AraC-type DNA-binding domain and AraC-containing proteins	3	2166211;2166219;3.0;CCG;CCGCCGCCG**2166554;2166563;3.3;GCG;GCGGCGGCGG**2166656;2166665;2.0;TACCG;TACCGTACCG
opr_1128	orf_2487	2172624	2172986	-	R	-	Acetyltransferase (isoleucine patch superfamily)	4	2172694;2172700;7.0;T;TTTTTTT**2172766;2172772;2.3;ACC;ACCACCA**2172906;2172918;2.2;GATGCC;GATGCCGATGCCG**2172956;2172965;3.3;GCA;GCAGCAGCAG
opr_1137	orf_2503	2185201	2185347	+	-	-	hypothetical protein	2	2185309;2185319;2.2;CAATG;CAATGCAATGC**2185317;2185326;2.0;TGCTT;TGCTTTGCTT
opr_1138	orf_2504	2185710	2186063	+	C	-	FoF1-type ATP synthase assembly protein I	1	2186023;2186029;7.0;T;TTTTTTT
opr_1139	orf_2512	2192194	2192616	+	C	atpC	FoF1-type ATP synthase	0	-
opr_1144	orf_2531	2211039	2211284	-	-	-	hypothetical protein	1	2211209;2211215;7.0;A;AAAAAAA
	orf_2532	2211347	2211598	-	-	-	hypothetical protein	0	-
opr_1148	orf_2542	2217688	2217909	-	M	YidD	Membrane-anchored protein YidD	2	2217702;2217715;2.3;CGTGTC;CGTGTCCGTGTCCG**2217880;2217888;3.0;CAG;CAGCAGCAG
Note： 1. The data of this table conresponds to N. gonorrhoeae 32867 genome. 2. Operon id; gene id; gene start; gene end; strand; COG id; gene name; function description; number of SSR; SSR attribute list are listed. 3. For SSR attribute, each SSR are separated by '**'. For each SSR; the attributes are listed as follows: start; end; period size; period sequence and complete sequence.

## Sheet: UGNGS_ref_N. gonorrhoeae 32867
Table S2(B) UGNGS in N. gonorrhoeae 32867
##Operon_id	gene_id	gene start	gene end	strand	COG_id	gene_name	function description	number_of_SSR	SSR_attributes(start;end;psize;period;sequence)
opr_2	orf_6	5857	6030	-	M	-	Outer membrane protein assembly factor BamE	2	5970;5977;2.0;CAGA;CAGACAGA**5979;5986;2.0;TGCC;TGCCTGCC
opr_4	orf_10	10289	10561	+	L	Mod	Adenine specific DNA methylase Mod	0	-
	orf_12	10957	11337	+	-	-	hypothetical protein	1	11152;11160;3.0;ATC;ATCATCATC
	orf_8	9156	9947	+	L	-	Site-specific DNA-adenine methylase	6	9241;9247;7.0;A;AAAAAAA**9364;9369;6.0;A;AAAAAA**9446;9455;2.5;TTTC;TTTCTTTCTT**9462;9467;6.0;A;AAAAAA**9800;9808;2.2;ATCC;ATCCATCCA**9906;9912;7.0;A;AAAAAAA
opr_6	orf_14	11898	12098	-	-	-	hypothetical protein	2	11974;11979;6.0;A;AAAAAA**12061;12069;3.0;CCG;CCGCCGCCG
opr_9	orf_22	15008	15148	+	-	-	hypothetical protein	1	15093;15102;2.5;GGGC;GGGCGGGCGG
opr_25	orf_53	42359	42616	-	-	-	hypothetical protein	0	-
opr_28	orf_57	48467	48613	-	-	-	hypothetical protein	0	-
opr_37	orf_67	57080	57211	-	-	-	hypothetical protein	0	-
opr_40	orf_70	57923	58054	-	-	-	hypothetical protein	0	-
	orf_71	58204	58335	-	-	-	hypothetical protein	0	-
opr_44	orf_81	66095	66343	+	-	-	hypothetical protein	1	66227;66237;2.2;CCTGC;CCTGCCCTGCC
	orf_84	69577	69759	+	-	-	hypothetical protein	0	-
	orf_82	66379	68214	+	M	YrhL	Peptidoglycan/LPS O-acetylase OafA/YrhL	4	66384;66394;3.7;CGC;CGCCGCCGCCG**66636;66646;2.8;TTTC;TTTCTTTCTTT**67624;67629;6.0;A;AAAAAA**68068;68076;3.0;GCC;GCCGCCGCC
opr_54	orf_101	81085	81522	+	P	-	Outer membrane receptor for ferric coprogen and ferric-rhodotorulic acid	3	81207;81214;2.7;CGA;CGACGACG**81288;81298;3.7;CGG;CGGCGGCGGCG**81391;81402;2.0;AAGCTG;AAGCTGAAGCTG
	orf_102	81592	81912	+	R	-	Predicted hydrolase of the alpha/beta superfamily	1	81720;81729;2.5;ACCG;ACCGACCGAC
	orf_103	81912	82481	+	R	-	Predicted hydrolase of the alpha/beta superfamily	2	82015;82023;3.0;CGC;CGCCGCCGC**82372;82382;2.2;GGCAG;GGCAGGGCAGG
opr_59	orf_122	99307	99495	-	-	-	hypothetical protein	1	99425;99440;2.0;AATTTCCA;AATTTCCAAATTTCCA
	orf_114	93350	94591	-	M	epsL	Sugar transferase involved in LPS biosynthesis (colanic	5	93788;93794;2.3;GTT;GTTGTTG**93796;93807;2.0;CGACGG;CGACGGCGACGG**93843;93851;3.0;AGC;AGCAGCAGC**94224;94230;2.3;TTG;TTGTTGT**94545;94556;2.0;GATGCG;GATGCGGATGCG
opr_62	orf_127	102382	102504	+	-	-	hypothetical protein	0	-
opr_73	orf_145	121269	121400	+	-	-	hypothetical protein	1	121298;121307;2.5;GACG;GACGGACGGA
opr_74	orf_147	123008	123625	+	TK	-	DNA-binding response regulator	2	123065;123076;2.0;GCTGCC;GCTGCCGCTGCC**123314;123325;2.0;CAGGCG;CAGGCGCAGGCG
	orf_148	123638	124957	+	T	KdpD	K+-sensing histidine kinase KdpD	6	123649;123655;7.0;T;TTTTTTT**123652;123667;2.0;TTTTAAAA;TTTTAAAATTTTAAAA**123963;123969;2.3;ATT;ATTATTA**124185;124194;2.5;GCCT;GCCTGCCTGC**124761;124772;2.0;CCGAAT;CCGAATCCGAAT**124828;124840;2.2;GGGGCT;GGGGCTGGGGCTG
opr_76	orf_150	126484	126600	+	-	-	hypothetical protein	1	126528;126537;2.0;CCGCC;CCGCCCCGCC
opr_78	orf_157	131504	131632	+	-	-	hypothetical protein	2	131587;131592;6.0;A;AAAAAA**131601;131606;6.0;T;TTTTTT
opr_79	orf_159	133869	134804	+	MV	-	Multidrug efflux pump subunit AcrA (membrane-fusion protein)	1	133871;133880;3.3;GCA;GCAGCAGCAG
opr_80	orf_162	135667	137388	+	V	-	ABC-type bacteriocin/lantibiotic exporters	5	135882;135892;2.2;GACGG;GACGGGACGGG**136185;136196;2.0;TTTGGC;TTTGGCTTTGGC**136195;136203;3.0;GCA;GCAGCAGCA**136399;136418;2.0;TCAAACGTTT;TCAAACGTTTTCAAACGTTT**136659;136672;2.0;GCGACGG;GCGACGGGCGACGG
	orf_160	135133	135336	+	-	-	hypothetical protein	1	135183;135190;2.7;CGG;CGGCGGCG
	orf_161	135350	135565	+	-	-	hypothetical protein	2	135453;135458;3.0;GT;GTGTGT**135473;135479;7.0;T;TTTTTTT
opr_88	orf_175	145923	146072	+	-	-	hypothetical protein	1	145992;145997;6.0;A;AAAAAA
opr_90	orf_179	148903	149121	+	-	-	hypothetical protein	1	149065;149085;2.1;TTAAAACCTA;TTAAAATCTATTAAAACCTAT
opr_93	orf_185	154727	154924	+	-	-	hypothetical protein	2	154733;154742;2.5;TTAA;TTAATTAATT**154740;154748;2.2;ATTT;ATTTATTTA
opr_96	orf_188	156594	157190	-	C	-	Dehydrogenase (flavoprotein)	0	-
opr_98	orf_191	159409	159597	-	-	-	hypothetical protein	0	-
opr_99	orf_196	162566	162718	+	-	-	hypothetical protein	2	162625;162630;6.0;T;TTTTTT**162640;162645;6.0;A;AAAAAA
opr_100	orf_197	163144	163278	+	-	-	hypothetical protein	0	-
	orf_201	167079	167732	+	X	-	Transposase and inactivated derivatives	3	167102;167111;2.5;AAAG;AAAGAAAGAA**167277;167288;2.4;GCCGG;GCCGGGCCGGGC**167328;167338;2.2;CGCGG;CGCGGCGCGGC
opr_101	orf_202	167866	168057	-	-	-	hypothetical protein	0	-
	orf_203	168090	168557	-	-	-	hypothetical protein	5	168093;168108;2.3;AATAAAG;AATAAAGAATAAAGAA**168171;168183;2.2;ATCAAA;ATCAAAATCAAAA**168188;168195;8.0;A;AAAAAAAA**168261;168273;2.2;TTTATC;TTTATCTTTATCT**168544;168553;2.5;TTAT;TTATTTATTT
	orf_204	168614	168952	-	-	-	hypothetical protein	0	-
	orf_205	168997	169185	-	-	-	hypothetical protein	0	-
opr_102	orf_206	169432	169746	-	-	-	hypothetical protein	0	-
	orf_207	169779	170318	-	-	-	hypothetical protein	1	170152;170175;2.5;CCTTCAGTCT;CCTTCAGTCTCCTTCATCTCCTTC
opr_104	orf_216	176338	176592	-	JO	-	Protein N-acetyltransferase	2	176426;176432;7.0;T;TTTTTTT**176548;176555;2.7;GAT;GATGATGA
	orf_217	176634	177041	-	JO	-	Protein N-acetyltransferase	1	176933;176944;2.0;CGGTTT;CGGTTTCGGTTT
opr_106	orf_230	187906	188355	-	X	-	Transposase and inactivated derivatives	2	188193;188203;2.2;GGGCG;GGGCGGGGCGG**188264;188273;2.5;CAAT;CAATCAATCA
opr_111	orf_241	199916	200044	-	-	-	hypothetical protein	0	-
opr_113	orf_244	204068	204331	+	-	-	hypothetical protein	3	204233;204239;7.0;T;TTTTTTT**204309;204316;8.0;T;TTTTTTTT**204320;204330;2.2;ATTTT;ATTTTATTTTA
opr_116	orf_251	208691	208819	-	-	-	hypothetical protein	0	-
opr_120	orf_261	217870	217986	+	-	-	hypothetical protein	3	217909;217924;3.8;TGCG;TGCGTGCCGTGCGTGC**217909;217928;2.2;TGCGTGCCG;TGCGTGCCGTGCGTGCCGTG**217911;217928;3.8;CGTGC;CGTGCCGTGCGTGCCGTG
opr_125	orf_275	227033	227197	+	-	-	hypothetical protein	1	227117;227128;2.0;TATGAT;TATGATTATGAT
opr_137	orf_301	251106	251492	+	-	-	hypothetical protein	0	-
opr_138	orf_303	252195	252347	-	-	-	hypothetical protein	1	252331;252341;2.2;GCCCC;GCCCCGCCCCG
opr_139	orf_304	252565	252735	+	-	-	hypothetical protein	0	-
opr_143	orf_315	262299	262424	+	-	-	hypothetical protein	1	262351;262357;7.0;T;TTTTTTT
opr_144	orf_319	265596	265757	-	-	-	hypothetical protein	1	265683;265690;2.0;TGTC;TGTCTGTC
	orf_326	270263	270718	-	-	-	hypothetical protein	1	270441;270454;2.0;CCGCTTT;CCGCTTTCCGCTTT
	orf_327	270829	271398	-	S	-	RelA_SpoT	0	-
opr_146	orf_332	279212	279358	-	-	-	hypothetical protein	0	-
opr_154	orf_345	289664	289828	-	-	-	hypothetical protein	1	289804;289809;6.0;T;TTTTTT
opr_155	orf_346	290079	290300	+	S	YqhA	Uncharacterized membrane protein YqhA	2	290120;290132;2.2;TGTCGA;TGTCGATGTCGAT**290143;290153;2.8;CATC;CATCCATCCAT
opr_157	orf_349	293093	293767	-	S	MutK	Uncharacterized membrane protein MutK	5	293255;293262;2.7;CAG;CAGCAGCA**293270;293276;2.3;GTC;GTCGTCG**293319;293332;2.3;ATGCCG;ATGCCGATGCCGAT**293344;293353;2.5;CGAG;CGAGCGAGCG**293390;293401;4.0;GAT;GATGATGATGAT
opr_160	orf_361	303344	303757	+	L	vsr	G:T-mismatch repair DNA endonuclease	1	303503;303508;6.0;A;AAAAAA
	orf_359	302142	302261	+	-	-	hypothetical protein	2	302166;302176;2.8;TTTC;TTTCTTTCTTT**302185;302191;7.0;T;TTTTTTT
	orf_363	304111	304356	+	-	-	hypothetical protein	3	304138;304148;2.2;AATAA;AATAAAATAAA**304144;304156;2.2;ATAAAT;ATAAATATAAATA**304142;304150;2.2;AAAT;AAATAAATA
	orf_362	303759	304097	+	L	-	Site-specific DNA-cytosine methylase	0	-
opr_164	orf_377	315823	315939	-	-	-	hypothetical protein	0	-
opr_170	orf_387	324880	325056	-	J	-	16S rRNA C967 or C1407 C5-methylase	0	-
opr_178	orf_407	339030	339179	+	-	-	hypothetical protein	0	-
	orf_408	339242	339415	+	-	-	hypothetical protein	0	-
	orf_406	338772	338984	+	GER	-	Permease of the drug/metabolite transporter (DMT) superfamily	0	-
opr_180	orf_416	346889	347104	+	R	-	Putative hemolysin	2	347011;347017;7.0;A;AAAAAAA**347025;347034;3.3;GCG;GCGGCGGCGG
	orf_423	350255	351223	+	V	-	Restriction endonuclease S subunit	1	350695;350706;2.4;AACCG;AACCGAACCGAA
	orf_421	348760	349407	+	X	-	Transposase	0	-
	orf_422	349455	350255	+	V	-	Type I restriction-modification system	0	-
opr_182	orf_429	356471	358360	-	R	-	GTPase SAR1 family domain	5	356927;356935;2.2;TTGA;TTGATTGAT**357486;357492;2.3;TGA;TGATGAT**358089;358100;2.0;TTGGCT;TTGGCTTTGGCT**358149;358155;7.0;A;AAAAAAA**358168;358175;2.7;CAT;CATCATCA
	orf_430	358361	359332	-	-	NgoFVII	Restriction endonuclease, type II, NgoFVII	2	358750;358755;6.0;T;TTTTTT**359053;359058;6.0;T;TTTTTT
	orf_431	359395	360438	-	L	ngoFVIIM	Site-specific DNA-cytosine methylase	2	359442;359453;2.0;TTTCTT;TTTCTTTTTCTT**360163;360169;7.0;T;TTTTTTT
opr_185	orf_435	362882	363061	+	-	-	hypothetical protein	3	363011;363021;2.2;CGCGC;CGCGCCGCGCC**363025;363034;2.0;TGCCG;TGCCGTGCCG**363028;363041;2.0;CGTGCCG;CGTGCCGCGTGCCG
opr_192	orf_453	379787	379918	+	-	-	hypothetical protein	0	-
opr_200	orf_477	400235	401086	+	X	dinD	Phage antirepressor protein YoqD	0	-
	orf_478	401253	402473	+	V	-	Restriction endonuclease S subunit	9	401261;401272;2.4;GCAAA;GCAAAGCAAAGC**401653;401664;2.0;AAATGC;AAATGCAAATGC**401680;401691;2.0;CAGATA;CAGATACAGATA**401703;401713;2.2;CCCAT;CCCATCCCATC**401728;401733;6.0;A;AAAAAA**401762;401794;2.8;GCTGGAAGCTAC;GCTGGAAGCTACGCTGGAAGCTACGCTGGAAGC**402111;402117;7.0;A;AAAAAAA**402306;402317;2.0;ATCCCC;ATCCCCATCCCC**402334;402339;6.0;A;AAAAAA
	orf_476	399211	400119	+	V	hsdM	Type I restriction-modification system	4	399310;399316;2.3;GAA;GAAGAAG**399318;399324;2.3;CTT;CTTCTTC**399662;399670;3.0;GCG;GCGGCGGCG**399849;399858;3.3;CAA;CAACAACAAC
opr_201	orf_479	402704	405802	+	V	hsdR	Type I site-specific restriction-modification system	12	402895;402902;4.0;GC;GCGCGCGC**403193;403203;2.2;ATTGA;ATTGAATTGAA**403214;403222;3.0;GTG;GTGGTGGTG**403535;403544;3.3;GCC;GCCGCCGCCG**403959;403965;7.0;A;AAAAAAA**403982;403987;6.0;A;AAAAAA**404053;404060;2.0;GGCG;GGCGGGCG**404384;404394;2.8;CAGG;CAGGCAGGCAG**404874;404879;6.0;A;AAAAAA**405008;405013;6.0;A;AAAAAA**405389;405395;7.0;A;AAAAAAA**405433;405439;2.3;CAT;CATCATC
opr_203	orf_482	408682	408885	+	K	cspA	Cold shock protein	0	-
opr_206	orf_487	413825	413986	-	-	-	hypothetical protein	1	413931;413937;2.3;GGC;GGCGGCG
opr_208	orf_492	417586	417981	-	M	-	Glycosyltransferase involved in cell wall bisynthesis	2	417816;417821;6.0;T;TTTTTT**417934;417945;2.0;GTCGAT;GTCGATGTCGAT
opr_210	orf_501	425516	425740	-	-	-	hypothetical protein	1	425680;425691;2.0;ATATGG;ATATGGATATGG
opr_211	orf_502	425970	426107	-	-	-	hypothetical protein	0	-
opr_212	orf_503	428073	428615	-	-	-	Porin domain	5	428120;428126;7.0;T;TTTTTTT**428263;428275;2.2;TTGCCG;TTGCCGTTGCCGT**428304;428316;2.2;GCTGCC;GCTGCCGCTGCCG**428499;428513;2.1;AGTTTCC;AGTTTCCAGTTTCCA**428583;428600;2.0;GGCGGGCAA;GGCGGGCAAGGCGGGCAA
opr_215	orf_508	432460	432609	+	-	-	hypothetical protein	2	432503;432512;2.0;GCGCG;GCGCGGCGCG**432547;432558;2.0;AAGGAT;AAGGATAAGGAT
opr_227	orf_528	451969	452442	+	NW	PilE	Tfp pilus assembly protein PilE	1	451998;452006;3.0;GAT;GATGATGAT
opr_229	orf_530	453072	453464	-	E	-	Predicted branched-chain amino acid permease (azaleucine resistance)	2	453192;453197;3.0;AA;AAAAAA**453200;453211;2.0;GCGCGG;GCGCGGGCGCGG
opr_233	orf_535	457117	458217	+	LX	-	Integrase	2	457533;457545;2.2;GTTTGC;GTTTGCGTTTGCG**457910;457921;2.0;TGAATG;TGAATGTGAATG
opr_234	orf_536	458573	458842	-	-	-	hypothetical protein	3	458576;458585;3.3;CTT;CTTCTTCTTC**458590;458596;7.0;T;TTTTTTT**458759;458774;2.0;TCCGGATT;TCCGGATTTCCGGATT
opr_235	orf_537	459037	459720	-	S	-	phage associated protein	4	459111;459120;2.0;ATTCC;ATTCCATTCC**459208;459217;2.5;TTCT;TTCTTTCTTT**459620;459631;2.0;GCCTGC;GCCTGCGCCTGC**459663;459672;2.5;CCGA;CCGACCGACC
	orf_538	459748	460308	-	-	-	hypothetical protein	2	460168;460173;3.0;CG;CGCGCG**460294;460299;3.0;TC;TCTCTC
	orf_539	460377	460592	-	-	-	hypothetical protein	0	-
	orf_540	460644	460964	-	S	-	Siphovirus Gp157	0	-
	orf_541	461132	461356	-	-	-	hypothetical protein	3	461233;461244;2.0;TGATGT;TGATGTTGATGT**461261;461270;3.3;GGC;GGCGGCGGCG**461314;461320;7.0;T;TTTTTTT
	orf_542	461454	462140	-	-	-	hypothetical protein	1	461549;461564;5.3;GCG;GCGGCGGCGCCGGCGG
opr_239	orf_553	468301	468795	+	S	-	Protein of unknwon function (DUF3310)	2	468320;468331;2.0;AAACCG;AAACCGAAACCG**468525;468541;2.1;ACGCGCCG;ACGCGCCGACGCGCCGA
opr_241	orf_555	468972	469121	+	-	-	hypothetical protein	0	-
	orf_557	469942	470157	+	-	-	hypothetical protein	0	-
opr_242	orf_558	470528	471046	+	S	-	hypothetical protein	2	470568;470574;2.3;ATG;ATGATGA**470958;470968;2.2;AAAAT;AAAATAAAATA
	orf_559	471112	471534	+	-	-	Winged helix-turn-helix DNA-binding domain	0	-
	orf_560	471543	471776	+	-	-	hypothetical protein	0	-
	orf_561	471831	472073	+	-	-	hypothetical protein	0	-
	orf_562	472075	473328	+	X	-	Phage terminase large subunit	5	472142;472152;3.7;GCG;GCGGCGGCGGC**472217;472225;4.5;GC;GCGCGCGCG**472444;472450;7.0;A;AAAAAAA**473068;473074;2.3;GAA;GAAGAAG**473082;473088;2.3;GGC;GGCGGCG
opr_243	orf_564	475817	477013	+	-	-	hypothetical protein	9	475900;475913;2.3;GGAGCG;GGAGCGGGAGCGGG**475912;475920;3.0;GGC;GGCGGCGGC**475969;475979;2.2;GGCCG;GGCCGGGCCGG**476141;476150;2.0;GCGCG;GCGCGGCGCG**476173;476182;2.5;CGGA;CGGACGGACG**476181;476190;3.3;CGC;CGCCGCCGCC**476408;476414;2.3;GCG;GCGGCGG**476440;476456;5.7;GGC;GGCGGCGGCTGCGGCGG**476976;476988;2.2;ATGAGA;ATGAGAATGAGAA
	orf_567	484937	486229	+	-	-	hypothetical protein	5	484990;484997;2.7;GGC;GGCGGCGG**485288;485296;3.0;GGC;GGCGGCGGC**485406;485414;4.5;GC;GCGCGCGCG**485644;485653;3.3;GCC;GCCGCCGCCG**485779;485787;4.5;CG;CGCGCGCGC
	orf_568	486284	486757	+	-	-	hypothetical protein	1	486712;486723;2.0;CGATAT;CGATATCGATAT
	orf_569	486763	487248	+	-	-	hypothetical protein	1	486824;486832;3.0;CGG;CGGCGGCGG
	orf_570	487251	487919	+	-	-	hypothetical protein	3	487430;487441;2.0;TTATGC;TTATGCTTATGC**487628;487639;2.0;TGCGCC;TGCGCCTGCGCC**487695;487707;2.2;GGGGAC;GGGGACGGGGACG
	orf_565	477037	484311	+	R	-	Predicted amidophosphoribosyltransferases	31	477306;477315;3.3;CGG;CGGCGGCGGC**477329;477334;3.0;GG;GGGGGG**477676;477682;2.3;GCG;GCGGCGG**477766;477788;1.9;GTTGCGGCGGCG;GTTGCGGCGGCGGTTGCGGCGGC**477769;477778;3.3;GCG;GCGGCGGCGG**477851;477862;2.4;CGGCA;CGGCACGGCACG**478050;478057;2.0;CGGA;CGGACGGA**478071;478076;6.0;G;GGGGGG**478135;478153;6.0;GCG;GCGGCGGCGGACGGCGGCG**478238;478246;3.0;AGG;AGGAGGAGG**478303;478309;3.5;GC;GCGCGCG**478684;478…
opr_246	orf_575	490245	490547	-	-	-	hypothetical protein	0	-
opr_247	orf_576	493137	493310	-	-	-	hypothetical protein	4	493155;493175;1.9;GCTTTGTTCGC;GCTTTGTTCGCGCTTTGTTCG**493194;493203;3.3;GCG;GCGGCGGCGG**493236;493254;6.3;GGC;GGCGGCGGCGTCGGCGGCG**493238;493255;2.0;CGGCGGCGT;CGGCGGCGTCGGCGGCGT
opr_256	orf_590	499579	501096	-	S	-	Uncharacterized conserved protein	2	500198;500209;2.0;TTTGCA;TTTGCATTTGCA**500446;500454;3.0;GGC;GGCGGCGGC
opr_257	orf_591	501808	502017	-	S	-	Uncharacterized conserved protein	0	-
opr_258	orf_593	502452	502730	-	S	-	Uncharacterized conserved protein	2	502595;502603;3.0;CTG;CTGCTGCTG**502674;502691;6.0;GCC;GCCGCCTCCGCCGCCGCC
opr_265	orf_606	513211	514173	-	-	-	hypothetical protein	2	514125;514135;2.2;ATAAA;ATAAAATAAAA**514140;514145;6.0;A;AAAAAA
opr_266	orf_611	517466	517588	+	-	-	hypothetical protein	1	517567;517577;2.2;GTGCC;GTGCCGTGCCG
opr_267	orf_612	517656	518348	-	S	-	Protein of unknown function (DUF1436)	4	517939;517944;6.0;T;TTTTTT**517951;517961;2.2;GTTTT;GTTTTGTTTTG**518005;518016;2.4;TTTCG;TTTCGTTTCGTT**518295;518301;7.0;A;AAAAAAA
opr_269	orf_620	524997	525137	-	-	-	hypothetical protein	0	-
opr_270	orf_622	526015	526230	-	-	-	hypothetical protein	0	-
	orf_625	527529	527768	-	-	-	hypothetical protein	3	527664;527669;6.0;A;AAAAAA**527666;527675;2.0;AAAAT;AAAATAAAAT**527727;527732;3.0;TT;TTTTTT
opr_272	orf_630	530011	530151	-	-	-	hypothetical protein	0	-
opr_276	orf_636	536238	536366	-	-	-	hypothetical protein	0	-
opr_281	orf_644	541685	541921	+	X	-	Transposase and inactivated derivatives	0	-
opr_282	orf_645	542024	542368	-	-	-	hypothetical protein	3	542044;542054;2.2;AGGGA;AGGGAAGGGAA**542188;542196;3.0;TGC;TGCTGCTGC**542205;542211;2.3;GAC;GACGACG
opr_283	orf_649	545151	545465	+	-	-	hypothetical protein	1	545353;545366;2.0;CAAACGC;CAAACGCCAAACGC
opr_286	orf_654	550209	550331	-	-	-	hypothetical protein	0	-
opr_288	orf_657	552582	552701	-	-	-	hypothetical protein	0	-
opr_289	orf_658	552702	552815	+	-	-	hypothetical protein	1	552770;552775;6.0;T;TTTTTT
opr_291	orf_661	555529	556176	+	L	III	DNA polymerase III	2	555553;555561;9.0;T;TTTTTTTTT**555792;555799;2.7;GTC;GTCGTCGT
	orf_662	556225	556446	+	S	YsdA	Uncharacterized membrane protein YsdA	2	556270;556275;6.0;T;TTTTTT**556322;556331;2.5;CCGT;CCGTCCGTCC
opr_292	orf_664	558856	558978	-	-	-	hypothetical protein	1	558936;558945;3.3;TGA;TGATGATGAT
	orf_663	556487	558856	-	X	-	Transposase	7	556799;556809;2.2;TGCCT;TGCCTTGCCTT**557187;557195;3.0;GGC;GGCGGCGGC**557427;557439;2.2;TGCACA;TGCACATGCACAT**558485;558509;3.1;CCAAGCTG;CCAAGCTGTCAAGCTGCCAAGCTGC**558597;558609;2.2;TTTTTA;TTTTTATTTTTAT**558749;558757;3.0;GTC;GTCGTCGTC**558764;558770;2.3;CAG;CAGCAGC
opr_293	orf_665	559164	559418	-	K	-	DNA-binding transcriptional regulator	0	-
	orf_666	559435	559728	-	-	-	Phage-associated protein, BcepMu gp16 family	0	-
opr_294	orf_667	559937	560317	+	K	-	Transcriptional regulator	3	559969;559982;2.0;GAAAGAA;GAAAGAAGAAAGAA**560218;560230;2.2;CGGCAG;CGGCAGCGGCAGC**560265;560271;2.3;TGG;TGGTGGT
opr_295	orf_668	560551	561591	+	-	NdpA	Nucleoid-associated protein NdpA	7	560554;560560;7.0;A;AAAAAAA**560560;560566;2.3;ATT;ATTATTA**560629;560638;2.5;TTGA;TTGATTGATT**560742;560748;7.0;T;TTTTTTT**560991;560997;2.3;ATT;ATTATTA**561204;561210;7.0;T;TTTTTTT**561576;561585;3.3;ACA;ACAACAACAA
opr_296	orf_669	561822	561962	+	-	-	hypothetical protein	0	-
opr_297	orf_671	562717	563004	+	-	-	hypothetical protein	1	562864;562870;2.3;GCG;GCGGCGG
	orf_676	564336	565202	+	L	-	CRISPR-associated protein Csd1 family	1	564788;564797;2.5;CCTG;CCTGCCTGCC
	orf_677	565335	565694	+	L	-	crispr-associated protein	0	-
	orf_670	562163	562597	+	FT	-	ppGpp synthetase catalytic domain (RelA/SpoT-type nucleotidyltranferase)	3	562244;562250;2.3;CTT;CTTCTTC**562304;562310;7.0;A;AAAAAAA**562451;562458;2.0;CAGC;CAGCCAGC
	orf_673	563340	563501	+	J	DksA	RNA polymerase-binding transcription factor DksA	0	-
	orf_675	563936	564286	+	X	-	Transposase	3	563988;563994;7.0;A;AAAAAAA**563997;564003;2.3;CCG;CCGCCGC**564047;564057;2.8;CGGC;CGGCCGGCCGG
opr_300	orf_682	569504	569755	+	-	-	hypothetical protein	1	569511;569516;6.0;T;TTTTTT
opr_305	orf_691	580901	581716	+	K	-	AraC-type DNA-binding domain and AraC-containing proteins	4	581279;581285;2.3;GCG;GCGGCGG**581458;581467;3.3;GCG;GCGGCGGCGG**581521;581528;4.0;GC;GCGCGCGC**581607;581614;4.0;GC;GCGCGCGC
opr_306	orf_692	582066	582251	-	R	-	Uncharacterized conserved protein	0	-
opr_308	orf_694	583555	583704	-	-	-	hypothetical protein	0	-
opr_311	orf_698	585933	586046	+	-	-	hypothetical protein	1	586004;586012;3.0;GAA;GAAGAAGAA
opr_312	orf_699	586571	587662	+	MU	-	Type V secretory pathway	0	-
opr_318	orf_709	595987	596118	+	-	-	hypothetical protein	0	-
opr_319	orf_719	602494	602616	+	-	-	hypothetical protein	1	602603;602610;8.0;T;TTTTTTTT
opr_320	orf_720	602628	602888	-	-	-	hypothetical protein	3	602748;602754;7.0;T;TTTTTTT**602770;602786;2.1;TTTTGGAT;TTTTGGATTTTTGGATT**602839;602847;2.2;GTCT;GTCTGTCTG
opr_322	orf_726	608897	609028	-	-	-	hypothetical protein	0	-
opr_324	orf_731	611301	611465	-	-	-	hypothetical protein	0	-
opr_325	orf_733	612719	612856	+	-	-	hypothetical protein	3	612821;612831;2.2;AAAAT;AAAATAAAATA**612836;612842;7.0;A;AAAAAAA**612848;612854;3.5;TA;TATATAT
	orf_734	612951	613121	+	X	-	Transposase	0	-
opr_327	orf_737	616712	616849	-	-	-	hypothetical protein	0	-
opr_328	orf_739	617800	618096	+	-	-	hypothetical protein	0	-
opr_330	orf_743	621538	621870	+	F	-	Xanthine/uracil permease	1	621731;621742;2.0;CGATGG;CGATGGCGATGG
opr_332	orf_750	625952	626263	+	-	-	hypothetical protein	0	-
opr_334	orf_755	629139	629330	-	-	-	hypothetical protein	0	-
opr_338	orf_763	635506	635670	+	-	-	hypothetical protein	0	-
opr_339	orf_766	638179	638388	+	-	-	hypothetical protein	2	638192;638198;7.0;T;TTTTTTT**638216;638233;3.0;TTGGGG;TTGGGGATGGGGTTGGGG
opr_340	orf_775	647733	647891	-	-	-	hypothetical protein	0	-
opr_342	orf_780	651980	652111	-	-	-	hypothetical protein	0	-
	orf_781	652272	652745	-	X	-	Transposase	1	652295;652305;2.2;CGGGG;CGGGGCGGGGC
opr_343	orf_782	652948	653364	+	X	-	Transposase and inactivated derivatives	2	653176;653187;2.0;CCCAAA;CCCAAACCCAAA**653285;653296;2.0;AAGCGG;AAGCGGAAGCGG
opr_344	orf_785	654395	654631	+	V	fitA	Plasmid stability protein	0	-
	orf_786	654631	655050	+	R	fitB	Predicted nucleic acid-binding protein	0	-
opr_348	orf_794	663422	663550	+	-	-	hypothetical protein	0	-
opr_351	orf_797	664848	665438	+	M	porA	Outer membrane protein (porin)	2	664901;664911;3.7;CGG;CGGCGGCGGCG**665034;665042;3.0;AAT;AATAATAAT
opr_352	orf_799	665805	665969	-	-	-	hypothetical protein	0	-
opr_353	orf_800	666017	666148	+	-	-	hypothetical protein	0	-
opr_358	orf_813	677711	678127	+	X	-	Transposase and inactivated derivatives	2	677939;677950;2.0;CCCAAA;CCCAAACCCAAA**678048;678059;2.0;AAGCGG;AAGCGGAAGCGG
opr_360	orf_817	680397	680588	+	-	-	hypothetical protein	0	-
opr_361	orf_820	681575	681928	-	P	-	ABC-type sulfate transport system	1	681585;681591;7.0;T;TTTTTTT
	orf_823	683716	684576	-	L	ngoMIVR	Inherit from proNOG: Type II DNA restriction endonuclease	1	684122;684133;2.0;TCTGCA;TCTGCATCTGCA
opr_362	orf_825	684577	685029	-	L	-	Site-specific DNA-cytosine methylase	3	684672;684678;7.0;T;TTTTTTT**684682;684687;6.0;A;AAAAAA**684856;684862;7.0;T;TTTTTTT
opr_363	orf_827	687223	687552	-	-	-	hypothetical protein	3	687355;687363;3.0;AGC;AGCAGCAGC**687385;687392;8.0;T;TTTTTTTT**687398;687404;2.3;AGG;AGGAGGA
	orf_830	690298	691089	-	-	-	Outer membrane adhesin/peptidase omptin	6	690470;690481;2.0;ACGCCC;ACGCCCACGCCC**690592;690600;3.0;GCC;GCCGCCGCC**690858;690863;3.0;TG;TGTGTG**690926;690932;7.0;T;TTTTTTT**690991;690998;2.0;ACGG;ACGGACGG**691081;691086;6.0;T;TTTTTT
opr_364	orf_831	692089	692418	+	J	MBF1	Archaeal ribosome-binding protein aMBF1	1	692304;692315;2.0;TGAAAA;TGAAAATGAAAA
opr_366	orf_836	695603	695749	-	E	-	Gamma-glutamyltranspeptidase	0	-
opr_370	orf_840	698262	698510	+	-	-	hypothetical protein	1	698396;698416;2.3;CGAGCGTGC;CGAGCGTGCCGAGCGTGCCGA
	orf_841	698560	698892	+	-	-	hypothetical protein	3	698592;698599;4.0;TG;TGTGTGTG**698605;698613;2.2;TTGC;TTGCTTGCT**698612;698619;2.0;CTGC;CTGCCTGC
opr_373	orf_846	701701	701838	+	-	-	hypothetical protein	3	701771;701779;2.2;TTCA;TTCATTCAT**701782;701790;3.0;GAT;GATGATGAT**701823;701828;6.0;T;TTTTTT
opr_377	orf_852	709077	709196	+	-	-	hypothetical protein	0	-
opr_382	orf_863	717062	717199	+	-	-	hypothetical protein	0	-
opr_384	orf_865	717578	718264	-	R	-	ABC-type uncharacterized transport system	2	717624;717635;2.0;TTGATG;TTGATGTTGATG**718036;718047;2.0;CGTGTT;CGTGTTCGTGTT
	orf_867	718490	718861	-	R	-	ABC-type uncharacterized transport system	1	718797;718803;2.3;ATC;ATCATCA
opr_385	orf_868	719071	719205	-	-	-	hypothetical protein	0	-
opr_387	orf_876	726268	726429	+	S	-	Uncharacterized membrane protein YsdA	0	-
opr_391	orf_888	733698	733934	+	-	-	hypothetical protein	1	733913;733919;7.0;T;TTTTTTT
	orf_889	733946	734251	+	-	-	hypothetical protein	0	-
opr_392	orf_892	737044	737844	-	M	-	Poly-gamma-glutamate biosynthesis protein CapA/YwtB (capsule formation)	1	737677;737688;2.0;TGCCGT;TGCCGTTGCCGT
	orf_898	743166	743849	-	P	-	Sulfite reductase	6	743312;743320;3.0;CTT;CTTCTTCTT**743356;743366;3.7;GCG;GCGGCGGCGGC**743568;743579;2.0;TTCGCC;TTCGCCTTCGCC**743595;743603;3.0;CAG;CAGCAGCAG**743603;743609;2.3;GGC;GGCGGCG**743687;743693;2.3;CCG;CCGCCGC
opr_396	orf_905	752059	752307	+	-	-	hypothetical protein	1	752088;752096;3.0;GCC;GCCGCCGCC
opr_398	orf_911	758225	758374	-	-	-	hypothetical protein	1	758341;758349;2.2;AAAT;AAATAAATA
opr_403	orf_920	764213	764347	+	S	-	Zn-dependent Hydrolase of the beta-lactamase fold protein	1	764312;764320;3.0;CTG;CTGCTGCTG
	orf_921	764403	764585	+	C	-	Cytochrome b561 family protein	0	-
opr_432	orf_973	822240	822404	-	-	-	hypothetical protein	0	-
	orf_975	823052	823327	-	-	-	hypothetical protein	3	823107;823120;2.0;TGTTTTT;TGTTTTTTGTTTTT**823109;823114;6.0;T;TTTTTT**823295;823303;3.0;CGC;CGCCGCCGC
opr_437	orf_983	831663	832664	-	X	-	Transposase	3	831771;831785;5.3;CTT;CTTCTTCTTTTCTTC**832440;832447;2.7;ATA;ATAATAAT**832462;832477;2.0;ATGCAGAT;ATGCAGATATGCAGAT
opr_439	orf_989	837086	837265	-	-	-	hypothetical protein	0	-
opr_449	orf_1007	851803	852657	-	MU	-	Type V secretory pathway	4	851861;851871;2.2;TTGCC;TTGCCTTGCCT**852172;852182;2.2;CTTGT;CTTGTCTTGTC**852349;852355;2.3;ATC;ATCATCA**852592;852598;7.0;T;TTTTTTT
opr_454	orf_1018	861627	861770	-	-	-	hypothetical protein	0	-
opr_458	orf_1023	867627	867923	+	-	-	hypothetical protein	2	867817;867822;6.0;T;TTTTTT**867868;867879;2.0;GGAAAG;GGAAAGGGAAAG
opr_460	orf_1025	869203	870273	+	LX	-	Integrase	11	869265;869272;2.0;AAGC;AAGCAAGC**869280;869289;3.3;CGG;CGGCGGCGGC**869296;869305;3.3;CTG;CTGCTGCTGC**869438;869446;3.0;CCG;CCGCCGCCG**869783;869792;2.5;CCGC;CCGCCCGCCC**869808;869820;2.2;CAAACC;CAAACCCAAACCC**869905;869915;3.7;CTG;CTGCTGCTGCT**869934;869944;2.8;CCGT;CCGTCCGTCCG**869954;869961;2.0;CCGC;CCGCCCGC**870002;870010;3.0;CCG;CCGCCGCCG**870079;870086;4.0;CA;CACACACA
opr_461	orf_1026	870502	870765	+	-	-	hypothetical protein	0	-
	orf_1027	870802	871086	+	-	-	hypothetical protein	4	870935;870943;2.2;CGGG;CGGGCGGGC**870986;870992;7.0;T;TTTTTTT**870993;870999;2.3;CGG;CGGCGGC**871060;871066;7.0;A;AAAAAAA
	orf_1029	871815	872027	+	-	-	Lambda repressor-like, DNA-binding domain	0	-
opr_463	orf_1033	874381	874500	+	X	-	Bacteriophage P2-related tail formation protein	0	-
	orf_1031	872212	873045	+	X	-	Phage baseplate assembly protein W	2	872606;872614;3.0;ACC;ACCACCACC**872623;872629;2.3;GCT;GCTGCTG
	orf_1032	873066	874313	+	X	-	Phage-related baseplate assembly protein	5	873144;873149;3.0;AA;AAAAAA**873425;873432;2.7;CGA;CGACGACG**873545;873556;2.4;GCGCC;GCGCCGCGCCGC**873620;873627;4.0;CG;CGCGCGCG**873861;873868;8.0;A;AAAAAAAA
opr_465	orf_1036	876842	877171	+	-	-	hypothetical protein	1	876998;877011;2.3;AAACCG;AAACCGAAACCGAA
opr_468	orf_1044	879433	879573	-	-	-	hypothetical protein	0	-
	orf_1043	878945	879328	-	V	-	Predicted nuclease of the RNAse H fold	0	-
opr_474	orf_1059	892975	893097	+	U	-	Pfam:DUF638	0	-
opr_476	orf_1061	893345	893506	+	-	-	hypothetical protein	0	-
opr_477	orf_1063	894736	895533	-	U	-	Hemolysin activation/secretion protein	5	894762;894773;2.4;TTTGG;TTTGGTTTGGTT**894773;894781;4.5;TC;TCTCTCTCT**895330;895341;2.0;ACGTTG;ACGTTGACGTTG**895352;895360;3.0;TGT;TGTTGTTGT**895436;895447;2.0;AGGGAT;AGGGATAGGGAT
	orf_1064	895571	895804	-	U	-	Large exoprotein involved in heme utilization or adhesion	0	-
	orf_1065	895829	896275	-	U	-	Large exoprotein involved in heme utilization or adhesion	1	896142;896151;3.3;GCT;GCTGCTGCTG
opr_478	orf_1067	897439	901005	-	U	-	Large exoprotein involved in heme utilization or adhesion	9	897904;897915;2.0;GCTTTG;GCTTTGGCTTTG**898026;898034;2.2;CTTG;CTTGCTTGC**898103;898112;3.3;CCG;CCGCCGCCGC**898284;898292;3.0;TGC;TGCTGCTGC**898297;898306;2.5;TTCG;TTCGTTCGTT**898420;898429;2.5;TGAT;TGATTGATTG**898446;898457;2.0;TGATGT;TGATGTTGATGT**898461;898471;2.8;TGCC;TGCCTGCCTGC**898576;898590;5.0;GTT;GTTGTTGATGTTGTT
opr_482	orf_1073	904252	904389	-	-	-	hypothetical protein	2	904291;904297;3.5;TC;TCTCTCT**904326;904336;2.2;CCAAA;CCAAACCAAAC
	orf_1075	906068	906907	-	-	-	hypothetical protein	4	906214;906222;3.0;TAT;TATTATTAT**906333;906338;6.0;A;AAAAAA**906669;906674;6.0;T;TTTTTT**906770;906779;3.3;ATC;ATCATCATCA
	orf_1074	904400	906001	-	V	-	Type I restriction-modification system	7	904403;904413;2.2;TGAAT;TGAATTGAATT**904608;904615;2.7;ACC;ACCACCAC**904667;904675;3.0;TTC;TTCTTCTTC**904873;904879;7.0;T;TTTTTTT**905066;905086;2.3;ATCGCGGAA;ATCGCGGAAATCGCTGAAATC**905836;905842;7.0;T;TTTTTTT**905967;905977;2.2;GATTT;GATTTGATTTG
opr_483	orf_1078	909002	910390	-	D	TPase	Chromosome segregation ATPase	4	909015;909022;2.0;CTTT;CTTTCTTT**909767;909773;7.0;T;TTTTTTT**910114;910124;2.2;GGCGC;GGCGCGGCGCG**910340;910349;2.5;TTGG;TTGGTTGGTT
	orf_1076	907471	908673	-	V	-	Restriction endonuclease S subunit	5	907554;907562;3.0;GGT;GGTGGTGGT**907683;907694;2.0;CATAAC;CATAACCATAAC**908163;908172;2.5;TTTG;TTTGTTTGTT**908181;908187;7.0;T;TTTTTTT**908295;908302;2.0;TTCC;TTCCTTCC
	orf_1077	908720	908953	-	S	-	Uncharacterized conserved protein	2	908930;908939;3.3;GAT;GATGATGATG**908942;908949;2.7;GTT;GTTGTTGT
opr_484	orf_1079	910654	912027	-	D	TPase	Chromosome segregation ATPase	6	911457;911465;3.0;CGT;CGTCGTCGT**911472;911479;2.7;TGT;TGTTGTTG**911697;911705;3.0;TGT;TGTTGTTGT**911826;911832;2.3;CAT;CATCATC**911817;911823;2.3;GGC;GGCGGCG**912008;912019;2.4;AACGT;AACGTAACGTAA
opr_485	orf_1081	913707	914243	+	MU	-	Type V secretory pathway	2	913918;913927;2.0;AATTT;AATTTAATTT**914085;914096;2.0;AACGTT;AACGTTAACGTT
	orf_1082	914333	914683	+	MU	-	Type V secretory pathway	1	914436;914447;2.0;GCACCA;GCACCAGCACCA
	orf_1084	915384	916988	+	MU	-	Type V secretory pathway	5	915891;915899;3.0;GTC;GTCGTCGTC**915998;916003;3.0;AT;ATATAT**916084;916090;2.3;ATA;ATAATAA**916317;916322;6.0;A;AAAAAA**916643;916663;1.9;TATGGGGCAAT;TATGGGGCAATTATGGGGCAA
opr_487	orf_1087	917516	917776	-	K	-	DNA-binding transcriptional regulator	0	-
opr_488	orf_1092	919975	920151	+	S	-	integral membrane protein	1	920075;920082;4.0;TG;TGTGTGTG
opr_489	orf_1093	920183	920311	-	-	-	hypothetical protein	1	920215;920223;3.0;CGG;CGGCGGCGG
opr_494	orf_1110	936914	937645	+	V	nlaIVR	Type II restriction enzyme NlaIV	2	937145;937150;6.0;A;AAAAAA**937372;937379;2.0;TGGG;TGGGTGGG
	orf_1109	935627	936898	+	L	nlaIVM	Site-specific DNA-cytosine methylase	4	935953;935959;7.0;A;AAAAAAA**936268;936274;7.0;A;AAAAAAA**936419;936427;9.0;A;AAAAAAAAA**936452;936462;2.8;TGGA;TGGATGGATGG
opr_498	orf_1119	943789	943983	+	-	-	hypothetical protein	2	943922;943931;2.5;GCCT;GCCTGCCTGC**943934;943947;2.3;TTTTCT;TTTTCTTTTTCTTT
opr_503	orf_1129	953015	953167	+	-	-	hypothetical protein	0	-
opr_509	orf_1136	959274	959477	+	-	-	hypothetical protein	2	959389;959399;2.2;AAAAT;AAAATAAAATA**959461;959471;2.8;CCCG;CCCGCCCGCCC
opr_510	orf_1138	961044	961160	+	-	-	hypothetical protein	0	-
opr_513	orf_1141	962940	963140	-	-	-	hypothetical protein	0	-
opr_516	orf_1149	967951	968331	+	-	-	hypothetical protein	0	-
opr_519	orf_1155	975934	976068	-	-	-	hypothetical protein	0	-
opr_521	orf_1159	978454	978948	+	T	fic	Fido	1	978661;978672;2.0;GATAAA;GATAAAGATAAA
opr_523	orf_1164	983584	984237	-	X	-	Transposase and inactivated derivatives	4	983978;983988;2.2;GCCGC;GCCGCGCCGCG**984003;984016;2.0;TACGCCG;TACGCCGTACGCCG**984028;984039;2.4;GCCCG;GCCCGGCCCGGC**984205;984214;2.5;TTCT;TTCTTTCTTT
opr_526	orf_1169	993217	993336	+	-	-	hypothetical protein	1	993270;993278;3.0;AGA;AGAAGAAGA
	orf_1170	993370	993672	+	-	-	hypothetical protein	0	-
opr_539	orf_1201	1023254	1023703	+	X	-	Transposase and inactivated derivatives	1	1023336;1023345;2.5;TGAT;TGATTGATTG
opr_545	orf_1208	1030536	1030709	-	-	-	hypothetical protein	1	1030656;1030666;2.2;ATGCG;ATGCGATGCGA
opr_546	orf_1209	1030917	1031048	-	-	-	hypothetical protein	1	1030988;1031000;2.6;AAAAC;AAAACAAAACAAA
opr_550	orf_1221	1041239	1041997	+	P	cah	Carbonic anhydrase	3	1041306;1041315;3.3;CCG;CCGCCGCCGC**1041587;1041598;2.0;TTCCAC;TTCCACTTCCAC**1041908;1041919;2.0;CAAGCG;CAAGCGCAAGCG
opr_556	orf_1238	1063066	1063449	-	P	-	Outer membrane receptor for ferric coprogen and ferric-rhodotorulic acid	2	1063211;1063218;4.0;CG;CGCGCGCG**1063364;1063373;2.5;GCAC;GCACGCACGC
opr_557	orf_1239	1063703	1064014	-	P	-	Outer membrane receptor for ferric coprogen and ferric-rhodotorulic acid	1	1063784;1063790;2.3;GAC;GACGACG
opr_558	orf_1243	1065668	1065805	+	-	-	hypothetical protein	1	1065718;1065735;2.0;CCGGAAAGT;CCGGAAAGTCCGGAAAGT
opr_559	orf_1245	1067346	1068836	-	O	GroEL	Negative regulator of GroEL	5	1067385;1067396;2.0;GCGGTA;GCGGTAGCGGTA**1067924;1067931;2.7;AGG;AGGAGGAG**1068217;1068228;2.0;TAGCCG;TAGCCGTAGCCG**1068249;1068257;3.0;GCG;GCGGCGGCG**1068749;1068758;3.3;GGC;GGCGGCGGCG
opr_561	orf_1247	1069107	1069913	-	-	-	hypothetical protein	4	1069565;1069576;2.0;CGTTGC;CGTTGCCGTTGC**1069627;1069633;2.3;GCG;GCGGCGG**1069676;1069684;3.0;TGT;TGTTGTTGT**1069683;1069690;2.7;GTG;GTGGTGGT
opr_562	orf_1248	1070305	1073733	-	P	-	Outer membrane receptor for ferrienterochelin and colicins	11	1070338;1070351;2.8;CCGGC;CCGGCCCGGCCCGG**1070983;1070994;2.0;GCTGCG;GCTGCGGCTGCG**1071232;1071244;2.2;GAGACC;GAGACCGAGACCG**1071650;1071670;2.3;GCCTGTACT;GCCTGTTCTGCCTGTACTGCC**1071956;1071971;5.0;CGC;CGCCGCTCGCCGCCGC**1072349;1072358;2.5;GGGC;GGGCGGGCGG**1072629;1072639;2.2;AGCCG;AGCCGAGCCGA**1072669;1072677;3.0;CAG;CAGCAGCAG**1072918;1072929;4.0;GGC;GGCGGCGGCGGC**1073100;1073111;2.4;CCCAG;CCCA…
opr_568	orf_1265	1091136	1091465	+	G	-	Predicted arabinose efflux permease	1	1091362;1091370;3.0;CTG;CTGCTGCTG
	orf_1266	1091474	1092190	+	G	sotB	Predicted arabinose efflux permease	3	1091566;1091578;2.2;GATGGC;GATGGCGATGGCG**1091655;1091663;3.0;CGG;CGGCGGCGG**1092164;1092173;3.3;GGC;GGCGGCGGCG
opr_569	orf_1267	1092425	1093861	+	M	DltB	D-alanyl-lipoteichoic acid acyltransferase DltB	11	1092500;1092509;2.5;CCGT;CCGTCCGTCC**1092712;1092717;6.0;T;TTTTTT**1092865;1092875;3.7;GCT;GCTGCTGCTGC**1092919;1092927;3.0;CGC;CGCCGCCGC**1093000;1093010;2.2;CCGCC;CCGCCCCGCCC**1093318;1093330;2.2;CTACAT;CTACATCTACATC**1093410;1093421;2.0;ACGGCT;ACGGCTACGGCT**1093447;1093460;2.8;GCACG;GCACGGCACGGCAC**1093494;1093504;2.2;GACGC;GACGCGACGCG**1093671;1093680;3.3;TGC;TGCTGCTGCT**1093799;1093807;3.0;C…
opr_572	orf_1273	1100101	1100754	-	X	-	Transposase and inactivated derivatives	4	1100495;1100505;2.2;GCCGC;GCCGCGCCGCG**1100520;1100533;2.0;TACGCCG;TACGCCGTACGCCG**1100545;1100556;2.4;GCCCG;GCCCGGCCCGGC**1100722;1100731;2.5;TTCT;TTCTTTCTTT
opr_573	orf_1274	1101606	1101737	-	-	-	hypothetical protein	1	1101629;1101635;2.3;GAA;GAAGAAG
opr_577	orf_1283	1109042	1109347	-	-	-	hypothetical protein	3	1109059;1109066;2.7;CGG;CGGCGGCG**1109210;1109228;2.1;GGCGTGTTC;GGCGTGTTCGGCGTGTTCG**1109293;1109303;2.2;GCGCG;GCGCGGCGCGG
opr_586	orf_1314	1133242	1133391	-	-	-	hypothetical protein	0	-
opr_588	orf_1316	1133568	1134104	-	S	-	Protein of unknwon function (DUF3310)	2	1133822;1133838;2.1;TCGGCGCG;TCGGCGCGTCGGCGCGT**1134032;1134043;2.0;CGGTTT;CGGTTTCGGTTT
opr_589	orf_1321	1137571	1137726	-	-	-	hypothetical protein	2	1137649;1137657;3.0;GGC;GGCGGCGGC**1137689;1137696;2.0;TCTT;TCTTTCTT
opr_594	orf_1331	1142756	1143442	+	-	-	hypothetical protein	1	1143332;1143347;5.3;CCG;CCGCCGGCGCCGCCGC
	orf_1332	1143540	1143764	+	-	-	hypothetical protein	3	1143576;1143582;7.0;A;AAAAAAA**1143626;1143635;3.3;CGC;CGCCGCCGCC**1143652;1143663;2.0;ACATCA;ACATCAACATCA
	orf_1333	1143932	1144252	+	S	-	Siphovirus Gp157	0	-
	orf_1334	1144304	1144519	+	-	-	hypothetical protein	0	-
	orf_1335	1144588	1145613	+	-	-	hypothetical protein	3	1144611;1144616;3.0;AA;AAAAAA**1144737;1144742;3.0;AA;AAAAAA**1145261;1145268;4.0;CG;CGCGCGCG
opr_595	orf_1341	1147963	1148163	+	N	-	Glycosyltransferase	0	-
	orf_1342	1148202	1149110	+	X	-	Transposase	4	1148296;1148311;2.0;ATCTGCAT;ATCTGCATATCTGCAT**1148334;1148340;2.3;GAA;GAAGAAG**1148988;1149002;5.3;GAA;GAAGAAAAGAAGAAG**1149013;1149020;2.7;TCA;TCATCATC
opr_597	orf_1344	1149742	1149948	-	-	-	hypothetical protein	1	1149803;1149808;6.0;A;AAAAAA
opr_598	orf_1347	1151573	1153162	-	R	TPase	ATPase/GTPase	7	1151600;1151606;7.0;C;CCCCCCC**1151928;1151935;2.0;TGCC;TGCCTGCC**1151983;1151992;2.5;GTCC;GTCCGTCCGT**1152105;1152113;3.0;GGC;GGCGGCGGC**1152437;1152446;2.0;AATTA;AATTAAATTA**1152468;1152476;3.0;CCG;CCGCCGCCG**1152481;1152487;7.0;A;AAAAAAA
	orf_1345	1150222	1151250	-	R	-	Zona occludens toxin	0	-
opr_600	orf_1353	1156150	1156572	-	L	vsr	G:T-mismatch repair DNA endonuclease	1	1156295;1156300;6.0;T;TTTTTT
	orf_1354	1156578	1157174	-	L	-	Inherit from bactNOG: dna mismatch repair	5	1156602;1156608;7.0;T;TTTTTTT**1156606;1156615;2.5;TTTG;TTTGTTTGTT**1156627;1156634;2.0;AATA;AATAAATA**1156818;1156823;6.0;T;TTTTTT**1157161;1157174;2.0;CTTTCAC;CTTTCACCTTTCAC
opr_601	orf_1355	1157364	1158221	-	L	MutL	DNA mismatch repair ATPase MutL	3	1157816;1157822;7.0;T;TTTTTTT**1157839;1157851;2.2;AAAGTA;AAAGTAAAAGTAA**1158082;1158093;2.0;ACTTCC;ACTTCCACTTCC
	orf_1356	1158235	1158591	-	L	-	Site-specific DNA-cytosine methylase	0	-
	orf_1357	1158603	1159115	-	L	-	Site-specific DNA-cytosine methylase	4	1158749;1158755;7.0;T;TTTTTTT**1158925;1158933;3.0;ACA;ACAACAACA**1159062;1159072;3.7;ATC;ATCATCATCAT**1159075;1159080;6.0;T;TTTTTT
opr_602	orf_1358	1159568	1159714	+	S	-	Uncharacterized conserved protein	0	-
opr_603	orf_1359	1159419	1159547	-	-	-	hypothetical protein	0	-
opr_604	orf_1360	1160656	1161045	+	-	-	hypothetical protein	3	1160797;1160811;2.5;GCCTTC;GCCTTCGCCTTCGCC**1160918;1160924;7.0;T;TTTTTTT**1161007;1161017;2.2;GCCCC;GCCCCGCCCCG
opr_611	orf_1368	1173546	1174757	-	C	-		2	1173818;1173829;2.0;CCAAAT;CCAAATCCAAAT**1173898;1173907;2.5;TGGC;TGGCTGGCTG
	orf_1369	1174831	1175142	-	K	-	DNA-binding transcriptional regulator	3	1174938;1174950;2.2;CCACCG;CCACCGCCACCGC**1174999;1175011;2.2;CAGATG;CAGATGCAGATGC**1175022;1175033;2.0;CATTCA;CATTCACATTCA
opr_617	orf_1384	1192177	1193139	-	X	-	Transposase	3	1192285;1192299;5.3;CTT;CTTCTTCTTTTCTTC**1192954;1192961;2.7;ATA;ATAATAAT**1192976;1192991;2.0;ATGCAGAT;ATGCAGATATGCAGAT
opr_618	orf_1385	1193485	1193703	-	-	-	hypothetical protein	0	-
opr_624	orf_1394	1205152	1205295	+	L	-	transposase	0	-
opr_630	orf_1423	1233749	1233865	-	S	YsdA	Uncharacterized membrane protein YsdA	0	-
opr_632	orf_1432	1241155	1241586	+	K	-	DNA-binding transcriptional regulator	1	1241558;1241563;6.0;A;AAAAAA
opr_634	orf_1437	1245441	1245557	-	-	-	hypothetical protein	1	1245475;1245481;7.0;A;AAAAAAA
opr_638	orf_1443	1249753	1249887	-	-	-	hypothetical protein	0	-
opr_641	orf_1446	1254816	1254959	-	-	-	hypothetical protein	1	1254879;1254885;2.3;ATT;ATTATTA
opr_643	orf_1451	1260812	1261012	-	-	-	hypothetical protein	0	-
	orf_1452	1261178	1262140	-	X	-	Transposase	3	1261286;1261300;5.3;CTT;CTTCTTCTTTTCTTC**1261955;1261961;2.3;ATA;ATAATAA**1261977;1261992;2.0;ATGCAGAT;ATGCAGATATGCAGAT
opr_644	orf_1453	1262652	1262858	-	-	-	hypothetical protein	1	1262713;1262718;6.0;A;AAAAAA
opr_645	orf_1456	1264519	1266087	-	R	TPase	ATPase/GTPase	5	1264524;1264531;8.0;C;CCCCCCCC**1264853;1264860;2.0;TGCC;TGCCTGCC**1264908;1264917;2.5;GTCC;GTCCGTCCGT**1265030;1265038;3.0;GGC;GGCGGCGGC**1265439;1265448;2.0;TCCAA;TCCAATCCAA
	orf_1454	1263132	1264160	-	R	-	Zona occludens toxin	0	-
opr_651	orf_1467	1276330	1276704	+	NW	pilE	Tfp pilus assembly protein	1	1276606;1276615;3.3;GAC;GACGACGACG
opr_652	orf_1473	1280562	1280816	-	-	-	hypothetical protein	0	-
opr_658	orf_1484	1293938	1294072	-	-	-	hypothetical protein	0	-
opr_659	orf_1485	1294100	1294225	+	-	-	hypothetical protein	2	1294125;1294140;2.7;ATTTGA;ATTTGAATTTGAATTT**1294175;1294181;7.0;A;AAAAAAA
opr_662	orf_1489	1296754	1296867	+	-	-	hypothetical protein	1	1296846;1296858;2.2;AAAATC;AAAATCAAAATCA
opr_663	orf_1490	1296995	1297237	-	-	-	hypothetical protein	0	-
opr_664	orf_1498	1302445	1302558	+	-	-	hypothetical protein	0	-
	orf_1499	1302704	1303015	+	X	-	Phage head maturation protease	1	1302785;1302795;3.7;GCG;GCGGCGGCGGC
	orf_1495	1300934	1301341	+	X	BeeE	Phage portal protein BeeE	0	-
opr_673	orf_1510	1315803	1315997	+	-	-	hypothetical protein	0	-
	orf_1512	1317529	1318002	+	S	YbjQ	Uncharacterized conserved protein YbjQ	5	1317695;1317703;3.0;CCG;CCGCCGCCG**1317735;1317745;3.7;CGG;CGGCGGCGGCG**1317777;1317796;2.9;ACGGCAA;ACGGCAAGCGGCAAACGGCA**1317956;1317963;2.0;GTTC;GTTCGTTC**1317970;1317975;3.0;CG;CGCGCG
opr_674	orf_1513	1318211	1318474	-	P	-	Outer membrane receptor for ferrienterochelin and colicins	0	-
	orf_1514	1318546	1319508	-	P	-	Outer membrane receptor for ferrienterochelin and colicins	1	1318819;1318827;3.0;GTA;GTAGTAGTA
opr_675	orf_1515	1319730	1320569	-	P	-	Outer membrane receptor for ferrienterochelin and colicins	1	1320041;1320049;3.0;TCA;TCATCATCA
opr_678	orf_1524	1327145	1327324	+	-	-	hypothetical protein	0	-
opr_686	orf_1545	1348846	1349739	-	E	-	3-deoxy-D-arabino-heptulosonate 7-phosphate (DAHP) synthase	1	1349462;1349470;3.0;CCG;CCGCCGCCG
	orf_1543	1347722	1347841	-	-	-	hypothetical protein	1	1347780;1347787;2.0;CTGC;CTGCCTGC
opr_688	orf_1550	1354402	1354554	-	S	YsdA	Uncharacterized membrane protein YsdA	1	1354523;1354529;7.0;A;AAAAAAA
opr_689	orf_1554	1356249	1356851	+	IQR	fabG	NAD(P)-dependent dehydrogenase	2	1356504;1356512;3.0;CGC;CGCCGCCGC**1356788;1356795;2.0;GATG;GATGGATG
	orf_1553	1355660	1356205	+	I	-	Predicted 3-hydroxylacyl-ACP dehydratase	1	1355843;1355852;2.0;CGGCT;CGGCTCGGCT
opr_694	orf_1564	1366904	1367131	+	C	-	L-lactate permease	2	1366958;1366968;3.7;GCC;GCCGCCGCCGC**1367058;1367070;2.2;TTGCCG;TTGCCGTTGCCGT
opr_699	orf_1575	1381403	1381621	-	-	-	hypothetical protein	0	-
	orf_1580	1385401	1385517	-	-	-	hypothetical protein	0	-
opr_705	orf_1589	1394338	1394715	-	-	-	Immunity protein 41	2	1394351;1394357;2.3;TAA;TAATAAT**1394612;1394619;2.7;TCA;TCATCATC
	orf_1591	1395220	1395849	-	U	-	Large exoprotein involved in heme utilization or adhesion	1	1395288;1395293;6.0;T;TTTTTT
opr_708	orf_1597	1398614	1398817	-	-	-	hypothetical protein	0	-
	orf_1601	1400643	1400933	-	S	-	Suppressor of fused protein (SUFU)	2	1400728;1400734;7.0;T;TTTTTTT**1400918;1400925;8.0;T;TTTTTTTT
opr_710	orf_1604	1401912	1402265	-	-	-	hypothetical protein	2	1402227;1402232;3.0;TT;TTTTTT**1402237;1402245;3.0;ATT;ATTATTATT
opr_711	orf_1605	1402562	1403080	-	S	-	Suppressor of fused protein (SUFU)	5	1402566;1402575;2.5;CCTG;CCTGCCTGCC**1402739;1402750;2.0;ATAAGG;ATAAGGATAAGG**1402821;1402832;2.0;AATTGA;AATTGAAATTGA**1402910;1402915;6.0;A;AAAAAA**1402986;1403003;2.0;ACTTGGAAA;ACTTGGAAAACTTGGAAA
opr_712	orf_1608	1405881	1405994	+	-	-	hypothetical protein	0	-
opr_715	orf_1613	1409718	1410488	-	O	-	ABC-type transport system involved in multi-copper enzyme maturation	2	1410216;1410223;2.7;GAT;GATGATGA**1410476;1410482;2.3;CGG;CGGCGGC
	orf_1616	1412084	1412818	-	P	NosD	Nitrous oxidase accessory protein NosD	1	1412710;1412719;2.5;CGCC;CGCCCGCCCG
opr_716	orf_1617	1412849	1412965	+	-	-	hypothetical protein	0	-
opr_717	orf_1618	1413027	1413383	-	P	-	Nitrous oxide reductase	0	-
	orf_1619	1413393	1414994	-	P	nosZ	Nitrous oxide reductase	4	1414001;1414012;2.0;ATTTGG;ATTTGGATTTGG**1414148;1414155;4.0;GC;GCGCGCGC**1414485;1414497;2.2;GGCATA;GGCATAGGCATAG**1414947;1414956;2.5;GAAC;GAACGAACGA
	orf_1620	1415104	1416309	-	K	nosR	Regulator of nitric oxide reductase transcription	5	1415223;1415235;2.2;TGTTTT;TGTTTTTGTTTTT**1415318;1415326;2.2;GGAT;GGATGGATG**1415887;1415898;2.0;CAGCGT;CAGCGTCAGCGT**1415966;1415977;2.0;AAGCGG;AAGCGGAAGCGG**1416051;1416060;3.3;CGA;CGACGACGAC
opr_718	orf_1624	1419513	1420082	-	-	-	hypothetical protein	0	-
opr_723	orf_1632	1425153	1425806	-	X	-	Transposase and inactivated derivatives	4	1425547;1425557;2.2;GCCGC;GCCGCGCCGCG**1425572;1425585;2.0;TACGCCG;TACGCCGTACGCCG**1425597;1425608;2.4;GCCCG;GCCCGGCCCGGC**1425774;1425783;2.5;TTCT;TTCTTTCTTT
opr_729	orf_1645	1435399	1435560	-	-	-	hypothetical protein	0	-
opr_730	orf_1651	1438917	1439033	-	-	-	hypothetical protein	1	1438980;1438991;2.0;TAAATT;TAAATTTAAATT
opr_733	orf_1656	1443679	1444656	+	P	-	ABC-type nitrate/sulfonate/bicarbonate transport system	3	1443923;1443931;3.0;TGA;TGATGATGA**1444063;1444069;7.0;A;AAAAAAA**1444142;1444147;3.0;CA;CACACA
	orf_1654	1441732	1442949	+	P	-	Outer membrane receptor for ferrienterochelin and colicins	4	1442169;1442175;2.3;CAA;CAACAAC**1442294;1442305;2.0;TCAAAC;TCAAACTCAAAC**1442588;1442600;2.2;TGGGCT;TGGGCTTGGGCTT**1442911;1442919;3.0;GCC;GCCGCCGCC
	orf_1655	1443008	1443622	+	P	-	Outer membrane receptor for ferrienterochelin and colicins	1	1443130;1443137;2.7;CAT;CATCATCA
opr_734	orf_1657	1445209	1445898	+	P	-	ABC-type nitrate/sulfonate/bicarbonate transport system	5	1445303;1445314;4.0;TGG;TGGTGGTGGTGG**1445574;1445580;2.3;GGT;GGTGGTG**1445594;1445606;2.2;GGTTCG;GGTTCGGGTTCGG**1445737;1445743;7.0;A;AAAAAAA**1445797;1445808;2.0;GTGGCG;GTGGCGGTGGCG
	orf_1658	1446005	1446697	+	P	-	ABC-type nitrate/sulfonate/bicarbonate transport system	2	1446392;1446400;3.0;CTG;CTGCTGCTG**1446656;1446662;2.3;GTG;GTGGTGG
opr_735	orf_1659	1446889	1447503	+	P	CadD	Cadmium resistance protein CadD	8	1446908;1446916;3.0;CTG;CTGCTGCTG**1447042;1447051;2.5;TTAG;TTAGTTAGTT**1447166;1447171;6.0;A;AAAAAA**1447177;1447182;6.0;A;AAAAAA**1447454;1447464;3.7;TTA;TTATTATTATT**1447468;1447474;2.3;AAT;AATAATA**1447484;1447501;2.0;CAATAATAT;CAATAATATCAATAATAT**1447485;1447491;2.3;AAT;AATAATA
opr_743	orf_1669	1461073	1461234	+	-	-	hypothetical protein	2	1461081;1461093;13.0;A;AAAAAATAAAAAA**1461122;1461128;2.3;CAC;CACCACC
opr_744	orf_1670	1461539	1462120	+	UW	-	Autotransporter adhesin	0	-
opr_745	orf_1671	1462324	1462572	+	UW	-	Autotransporter adhesin	2	1462486;1462493;2.0;ACCG;ACCGACCG**1462561;1462566;3.0;AA;AAAAAA
opr_752	orf_1682	1473859	1474014	+	-	-	hypothetical protein	0	-
opr_753	orf_1685	1474691	1474822	-	-	-	hypothetical protein	0	-
	orf_1686	1474971	1475090	-	-	-	hypothetical protein	0	-
	orf_1687	1475165	1475707	-	-	-	hypothetical protein	0	-
	orf_1688	1475707	1476003	-	M	-	Opacity protein and related surface antigens	0	-
opr_756	orf_1694	1481704	1481832	+	-	-	hypothetical protein	1	1481742;1481753;2.0;CAAACG;CAAACGCAAACG
opr_757	orf_1698	1485366	1485512	-	-	-	hypothetical protein	1	1485424;1485430;7.0;T;TTTTTTT
opr_760	orf_1706	1489509	1489754	-	-	-	hypothetical protein	2	1489558;1489569;2.0;TGGGAT;TGGGATTGGGAT**1489580;1489585;6.0;T;TTTTTT
	orf_1710	1491078	1491374	-	-	-	hypothetical protein	1	1491101;1491110;2.5;CCTG;CCTGCCTGCC
	orf_1711	1491495	1491908	-	-	-	hypothetical protein	1	1491809;1491817;3.0;CGG;CGGCGGCGG
opr_769	orf_1730	1507958	1508176	-	-	-	hypothetical protein	3	1507965;1507977;2.2;AAGAAA;AAGAAAAAGAAAA**1508140;1508149;10.0;C;CCCCCCCCCC**1508154;1508159;6.0;A;AAAAAA
opr_770	orf_1734	1511802	1513883	-	M	tbpB	transferrin-binding protein	13	1512359;1512369;2.8;TGCC;TGCCTGCCTGC**1512460;1512469;2.5;CCTG;CCTGCCTGCC**1512479;1512486;2.0;CGCC;CGCCCGCC**1512556;1512587;2.7;GTGTAGGTTGTT;GTGTAGGTTGTTGTGTAGGTTGTTGTGTAGGT**1512562;1512569;2.7;GTT;GTTGTTGT**1513090;1513099;2.5;TTAA;TTAATTAATT**1513111;1513118;8.0;T;TTTTTTTT**1513180;1513185;3.0;CT;CTCTCT**1513170;1513175;6.0;T;TTTTTT**1513194;1513199;3.0;TA;TATATA**1513415;1513421;7.0;T;TTTTT…
	orf_1735	1513966	1514109	-	-	-	hypothetical protein	0	-
opr_772	orf_1739	1516509	1517618	+	K	NMB0459	Fic family protein	2	1517066;1517074;3.0;GGC;GGCGGCGGC**1517555;1517564;2.5;ATTC;ATTCATTCAT
opr_778	orf_1745	1521070	1521942	+	K	-	Fic family protein	3	1521159;1521164;6.0;T;TTTTTT**1521537;1521543;2.3;CCG;CCGCCGC**1521762;1521768;7.0;T;TTTTTTT
opr_780	orf_1757	1530010	1530420	+	NW	pilE	Tfp pilus assembly protein	0	-
opr_788	orf_1770	1539102	1539629	-	C	-	2-Methylaconitate cis-trans-isomerase PrpF (2-methyl citrate pathway)	1	1539308;1539316;3.0;CGG;CGGCGGCGG
opr_789	orf_1772	1542098	1542784	-	C	-	Aconitase A	0	-
	orf_1773	1542861	1543649	-	S	YfcA	Uncharacterized membrane protein YfcA	2	1543245;1543251;7.0;A;AAAAAAA**1543435;1543445;2.8;CAAT;CAATCAATCAA
opr_796	orf_1809	1581481	1581777	+	M	-	Opacity protein and related surface antigens	0	-
opr_797	orf_1810	1581837	1582052	-	-	-	hypothetical protein	0	-
opr_799	orf_1812	1582391	1582522	+	-	-	hypothetical protein	1	1582438;1582444;7.0;T;TTTTTTT
	orf_1813	1582591	1583268	+	M	-	Outer membrane protein OmpA and related peptidoglycan-associated (lipo)proteins	0	-
opr_804	orf_1823	1590867	1591379	-	GR	pgmB	Beta-phosphoglucomutase or related phosphatase	2	1591052;1591061;3.3;CGG;CGGCGGCGGC**1591190;1591196;7.0;T;TTTTTTT
	orf_1824	1591396	1592286	-	G	-	Trehalose and maltose hydrolase (possible phosphorylase)	1	1591409;1591421;2.2;CGATGC;CGATGCCGATGCC
	orf_1825	1592311	1592604	-	G	-	Trehalose and maltose hydrolase (possible phosphorylase)	2	1592317;1592334;6.0;GTT;GTTGTTGTTGATGTTGTT**1592473;1592491;2.1;GGTGTAGTT;GGTGTAGTTGGTGTAGTTG
opr_806	orf_1829	1594935	1595339	-	G	-	Na+/melibiose symporter or related transporter	1	1595235;1595242;2.7;GAA;GAAGAAGA
opr_810	orf_1837	1600275	1600439	+	-	-	hypothetical protein	3	1600276;1600287;2.0;TGAATC;TGAATCTGAATC**1600283;1600297;2.5;GAATCC;GAATCCGAATCCGAA**1600341;1600347;7.0;A;AAAAAAA
opr_816	orf_1843	1604904	1605086	-	-	-	hypothetical protein	1	1604978;1604986;3.0;GGC;GGCGGCGGC
opr_819	orf_1851	1612315	1612692	+	-	-	Immunity protein 41	2	1612411;1612418;2.7;GAT;GATGATGA**1612679;1612685;2.3;ACA;ACAACAA
	orf_1849	1611203	1611880	+	U	-	Large exoprotein involved in heme utilization or adhesion	5	1611671;1611679;3.0;GCA;GCAGCAGCA**1611704;1611713;2.5;AAAG;AAAGAAAGAA**1611737;1611742;6.0;A;AAAAAA**1611752;1611758;3.5;TA;TATATAT**1611828;1611841;2.0;AAGAAAC;AAGAAACAAGAAAC
	orf_1852	1612823	1613560	+	U	-	Large exoprotein involved in heme utilization or adhesion	0	-
opr_821	orf_1854	1613809	1613976	+	-	-	hypothetical protein	1	1613852;1613857;3.0;GA;GAGAGA
opr_823	orf_1856	1614227	1614496	+	-	-	hypothetical protein	2	1614365;1614382;2.0;TTTTATTTG;TTTTATTTGTTTTATTTG**1614448;1614461;2.3;TGAATT;TGAATTTGAATTTG
	orf_1857	1614511	1614630	+	-	-	hypothetical protein	0	-
opr_824	orf_1858	1614944	1615162	+	S	-	Suppressor of fused protein (SUFU)	1	1614980;1614988;3.0;GAT;GATGATGAT
opr_825	orf_1859	1615269	1615409	-	-	-	hypothetical protein	0	-
opr_826	orf_1860	1615614	1615967	+	-	-	hypothetical protein	1	1615868;1615874;7.0;T;TTTTTTT
opr_835	orf_1880	1630565	1631728	+	LX	-	Integrase	1	1630879;1630892;2.3;CGGCAT;CGGCATCGGCATCG
opr_836	orf_1881	1631778	1632044	-	-	PrtN	Transcription regulator PrtN	1	1631887;1631903;2.1;AATCGGAA;AATCGGAAAATCGGAAA
	orf_1883	1633297	1634322	-	-	-	hypothetical protein	3	1633642;1633649;4.0;CG;CGCGCGCG**1634182;1634187;3.0;CG;CGCGCG**1634308;1634313;3.0;TC;TCTCTC
	orf_1884	1634391	1634606	-	-	-	hypothetical protein	0	-
	orf_1885	1634658	1634978	-	S	-	Siphovirus Gp157	0	-
	orf_1886	1635146	1635370	-	-	-	hypothetical protein	3	1635247;1635258;2.0;TGATGT;TGATGTTGATGT**1635275;1635284;3.3;GGC;GGCGGCGGCG**1635328;1635334;7.0;T;TTTTTTT
	orf_1887	1635468	1636154	-	-	-	hypothetical protein	1	1635563;1635578;5.3;GCG;GCGGCGGCGCCGGCGG
	orf_1882	1632152	1633276	-	V	-	Type I restriction-modification system	4	1632200;1632206;7.0;T;TTTTTTT**1632371;1632382;2.0;TTCCTT;TTCCTTTTCCTT**1632500;1632511;2.0;TTTGTC;TTTGTCTTTGTC**1633076;1633083;2.7;GTT;GTTGTTGT
opr_842	orf_1899	1643051	1643311	+	-	-	hypothetical protein	3	1643053;1643059;2.3;GAA;GAAGAAG**1643086;1643093;2.0;AGAC;AGACAGAC**1643120;1643128;3.0;GCC;GCCGCCGCC
opr_843	orf_1900	1643544	1643771	+	-	-	hypothetical protein	1	1643553;1643560;2.0;AAAC;AAACAAAC
	orf_1904	1645889	1646383	+	S	-	Protein of unknwon function (DUF3310)	2	1645908;1645919;2.0;AAACCG;AAACCGAAACCG**1646113;1646129;2.1;ACGCGCCG;ACGCGCCGACGCGCCGA
opr_845	orf_1906	1646560	1646709	+	-	-	hypothetical protein	0	-
opr_847	orf_1909	1647719	1648681	-	X	-	Transposase	3	1647827;1647841;5.3;CTT;CTTCTTCTTTTCTTC**1648496;1648502;2.3;ATA;ATAATAA**1648518;1648533;2.0;ATGCAGAT;ATGCAGATATGCAGAT
opr_848	orf_1910	1649193	1649399	-	-	-	hypothetical protein	1	1649254;1649259;6.0;A;AAAAAA
opr_849	orf_1913	1651060	1652628	-	R	TPase	ATPase/GTPase	5	1651065;1651072;8.0;C;CCCCCCCC**1651394;1651401;2.0;TGCC;TGCCTGCC**1651449;1651458;2.5;GTCC;GTCCGTCCGT**1651571;1651579;3.0;GGC;GGCGGCGGC**1651980;1651989;2.0;TCCAA;TCCAATCCAA
	orf_1911	1649673	1650701	-	R	-	Zona occludens toxin	0	-
opr_850	orf_1918	1654146	1655432	-	L	NicK	DNA relaxase NicK	6	1654234;1654242;4.5;TC;TCTCTCTCT**1654243;1654250;2.0;TCAA;TCAATCAA**1654266;1654279;2.0;TTCAATG;TTCAATGTTCAATG**1654849;1654854;3.0;AA;AAAAAA**1655360;1655366;7.0;C;CCCCCCC**1655377;1655382;6.0;G;GGGGGG
	orf_1916	1653604	1653807	-	-	-	hypothetical protein	0	-
	orf_1917	1653821	1654132	-	-	-	hypothetical protein	2	1653933;1653948;2.0;TTTTTCAA;TTTTTCAATTTTTCAA**1654076;1654082;7.0;T;TTTTTTT
	orf_1919	1655461	1655685	-	-	-	hypothetical protein	0	-
opr_855	orf_1929	1664049	1664903	-	MU	-	Type V secretory pathway	2	1664456;1664467;2.0;GGTAGA;GGTAGAGGTAGA**1664574;1664597;2.0;TGATGCTTTATT;TGATGCTTTATTTGATGCTTTATT
opr_857	orf_1931	1667607	1667759	-	-	-	hypothetical protein	0	-
opr_861	orf_1936	1670441	1671403	-	X	-	Transposase	3	1670549;1670563;5.3;CTT;CTTCTTCTTTTCTTC**1671218;1671224;2.3;ATA;ATAATAA**1671240;1671255;2.0;ATGCAGAT;ATGCAGATATGCAGAT
opr_862	orf_1937	1671915	1672121	-	-	-	hypothetical protein	1	1671976;1671981;6.0;A;AAAAAA
opr_863	orf_1939	1673486	1674712	-	R	TPase	ATPase/GTPase	4	1673787;1673795;9.0;C;CCCCCCCCC**1674117;1674124;2.0;TGCC;TGCCTGCC**1674172;1674181;2.5;GTCC;GTCCGTCCGT**1674294;1674302;3.0;GGC;GGCGGCGGC
	orf_1938	1672395	1673423	-	R	-	Zona occludens toxin	0	-
opr_864	orf_1940	1674917	1675201	+	-	-	hypothetical protein	0	-
	orf_1941	1675202	1676389	+	R	-	Zona occludens toxin	4	1675542;1675550;4.5;AC;ACACACACA**1675748;1675753;3.0;AA;AAAAAA**1675839;1675845;2.3;TAT;TATTATT**1675894;1675900;7.0;A;AAAAAAA
opr_865	orf_1942	1676604	1677548	+	X	-	Transposase	3	1676698;1676706;3.0;ATG;ATGATGATG**1677011;1677022;2.0;ACAGCA;ACAGCAACAGCA**1677089;1677096;2.0;GATA;GATAGATA
opr_866	orf_1944	1678391	1678735	+	-	-	hypothetical protein	2	1678549;1678567;2.1;CGAACACGC;CGAACACGCCGAACACGCC**1678721;1678727;2.3;GAC;GACGACG
	orf_1943	1677851	1678390	+	M	-	Peptidoglycan-binding (PGRP) domain of peptidoglycan hydrolases	2	1678204;1678216;2.2;CTTGGG;CTTGGGCTTGGGC**1678349;1678360;4.0;GCC;GCCGCCGCCGCC
opr_868	orf_1948	1679291	1679632	+	S	YifN	Uncharacterized protein YifN	1	1679342;1679350;3.0;GTC;GTCGTCGTC
opr_869	orf_1949	1679833	1680675	-	X	HI_1418	Prophage antirepressor	3	1680423;1680434;2.0;CGGCTT;CGGCTTCGGCTT**1680499;1680505;7.0;T;TTTTTTT**1680561;1680572;2.0;TTTGAA;TTTGAATTTGAA
opr_870	orf_1950	1681174	1681350	-	-	-	hypothetical protein	2	1681177;1681182;6.0;T;TTTTTT**1681323;1681329;7.0;T;TTTTTTT
opr_879	orf_1976	1702033	1702200	-	-	-	hypothetical protein	0	-
opr_886	orf_1991	1714130	1714291	+	-	-	hypothetical protein	0	-
opr_887	orf_1992	1713947	1714105	-	MU	-	Type V secretory pathway	2	1713987;1713996;2.5;CCGT;CCGTCCGTCC**1714073;1714082;2.5;CCTG;CCTGCCTGCC
opr_888	orf_1993	1714388	1714867	-	MU	-	Type V secretory pathway	1	1714775;1714786;2.0;TGAAAA;TGAAAATGAAAA
opr_889	orf_1994	1715653	1715766	+	-	-	hypothetical protein	0	-
opr_893	orf_2001	1718782	1718895	+	-	-	hypothetical protein	0	-
	orf_2002	1718937	1719233	+	-	OpcA	Outer membrane adhesin OpcA	0	-
	orf_2003	1719335	1719469	+	-	-	Outer membrane adhesin/peptidase omptin	1	1719431;1719444;2.3;ACCAAA;ACCAAAACCAAAAC
opr_894	orf_2004	1719607	1719723	-	-	-	hypothetical protein	0	-
opr_901	orf_2011	1729110	1729565	+	S	-	outer-membrane protein	1	1729203;1729210;2.7;CAT;CATCATCA
opr_903	orf_2013	1730089	1731051	+	X	-	Transposase	4	1730237;1730252;2.0;ATCTGCAT;ATCTGCATATCTGCAT**1730275;1730281;2.3;GAA;GAAGAAG**1730929;1730943;5.3;GAA;GAAGAAAAGAAGAAG**1730954;1730961;2.7;TCA;TCATCATC
opr_904	orf_2014	1731171	1731368	-	R	-	Fatty acid repression mutant protein (predicted oxidoreductase)	0	-
opr_913	orf_2031	1749142	1749297	+	-	-	hypothetical protein	0	-
opr_915	orf_2036	1755397	1756770	-	-	-	hypothetical protein	2	1756178;1756189;2.0;TTCAGG;TTCAGGTTCAGG**1756501;1756506;6.0;T;TTTTTT
opr_925	orf_2070	1783739	1783867	+	-	-	hypothetical protein	1	1783836;1783842;7.0;A;AAAAAAA
opr_929	orf_2075	1787043	1787243	-	-	-	hypothetical protein	0	-
opr_935	orf_2081	1793547	1793882	-	-	-	hypothetical protein	3	1793610;1793616;7.0;A;AAAAAAA**1793701;1793710;2.5;TCAA;TCAATCAATC**1793782;1793791;2.5;AAAT;AAATAAATAA
opr_939	orf_2087	1798742	1799062	+	G	-	Predicted arabinose efflux permease	2	1798795;1798803;3.0;CGC;CGCCGCCGC**1798839;1798847;3.0;CCG;CCGCCGCCG
opr_941	orf_2092	1801949	1802122	-	-	-	hypothetical protein	0	-
opr_944	orf_2096	1804817	1804960	-	-	-	hypothetical protein	1	1804836;1804846;2.2;AAAAT;AAAATAAAATA
opr_945	orf_2097	1804962	1806125	+	O	-	Cytochrome c peroxidase	3	1805137;1805148;2.0;AAGACC;AAGACCAAGACC**1805853;1805859;7.0;A;AAAAAAA**1806019;1806025;2.3;TCG;TCGTCGT
opr_947	orf_2102	1813905	1814069	+	-	-	hypothetical protein	1	1813921;1813937;2.8;TCAACG;TCAACGCCAACGTCAAC
opr_955	orf_2116	1825197	1825502	-	-	-	hypothetical protein	1	1825364;1825372;3.0;AAG;AAGAAGAAG
opr_960	orf_2125	1836232	1836705	-	-	-	hypothetical protein	3	1836267;1836275;4.5;GC;GCGCGCGCG**1836454;1836460;2.3;CAT;CATCATC**1836576;1836589;2.3;CCGACA;CCGACACCGACACC
opr_961	orf_2127	1838199	1839035	+	V	ngoPIIR	Type II restriction enzyme NgoPII	2	1838694;1838703;2.5;AAGG;AAGGAAGGAA**1838967;1838979;2.2;ATTAAA;ATTAAAATTAAAA
	orf_2128	1839040	1840032	+	L	ngoPIIM	Site-specific DNA-cytosine methylase	6	1839206;1839215;3.3;AAG;AAGAAGAAGA**1839550;1839559;2.0;TTTTC;TTTTCTTTTC**1839578;1839590;2.2;AAGACA;AAGACAAAGACAA**1839675;1839684;3.3;CAA;CAACAACAAC**1839773;1839783;2.8;CAGG;CAGGCAGGCAG**1840012;1840018;7.0;A;AAAAAAA
opr_962	orf_2138	1849918	1850403	+	S	-	Abi-like protein	2	1850133;1850138;6.0;A;AAAAAA**1850243;1850254;2.0;GTTTTA;GTTTTAGTTTTA
opr_963	orf_2140	1851339	1851479	-	S	YsdA	Uncharacterized membrane protein YsdA	1	1851406;1851417;2.0;TTTAAA;TTTAAATTTAAA
opr_964	orf_2144	1857432	1857896	+	-	-	hypothetical protein	0	-
opr_973	orf_2161	1873500	1873763	-	J	rpsQ	Ribosomal protein S17	0	-
opr_975	orf_2170	1878130	1878258	+	-	-	hypothetical protein	1	1878213;1878231;2.1;CAGAAATAT;CAGAAATATCAGAAATATC
opr_977	orf_2172	1878676	1878792	+	-	-	hypothetical protein	0	-
opr_980	orf_2178	1883741	1883890	-	S	-	Protein of unknown function (DUF560)	1	1883809;1883823;5.0;TGT;TGTTGTTCTTGTTGT
	orf_2180	1884798	1885082	-	S	-	Protein of unknown function (DUF560)	0	-
	orf_2179	1883897	1884796	-	R	-	Tetratricopeptide (TPR) repeat	1	1884589;1884602;2.0;GTTCATA;GTTCATAGTTCATA
opr_981	orf_2181	1885278	1886243	-	S	-	Lipoprotein GNA1870 C terminal like	4	1885289;1885296;2.7;CGC;CGCCGCCG**1885931;1885938;8.0;C;CCCCCCCC**1885953;1885958;6.0;T;TTTTTT**1886097;1886111;2.1;ACCTTTA;ACCTTTAACCTTTAA
opr_987	orf_2193	1902838	1903392	-	X	-	Transposase and inactivated derivatives	2	1903137;1903143;2.3;CGG;CGGCGGC**1903383;1903389;2.3;CTG;CTGCTGC
opr_989	orf_2205	1916260	1916424	+	-	-	hypothetical protein	1	1916391;1916401;2.2;GCCCC;GCCCCGCCCCG
opr_992	orf_2210	1920603	1921178	+	R	-	Predicted double-glycine peptidase	0	-
opr_995	orf_2214	1924115	1924462	+	I	-	Long-chain fatty acid transport protein	0	-
opr_998	orf_2217	1925373	1925840	-	-	-	hypothetical protein	1	1925808;1925816;3.0;TTC;TTCTTCTTC
opr_1001	orf_2224	1930421	1931272	-	L	hphIBM	Adenine-specific DNA methylase	2	1930464;1930476;2.6;TTCTT;TTCTTTTCTTTTC**1930693;1930703;2.2;ATGTA;ATGTAATGTAA
	orf_2223	1929234	1930358	-	V	hphIR	Predicted restriction endonuclease	3	1929391;1929399;3.0;TCA;TCATCATCA**1929413;1929423;2.2;TCAAA;TCAAATCAAAT**1930331;1930346;2.0;TTTGGCTG;TTTGGCTGTTTGGCTG
opr_1002	orf_2226	1931421	1931918	-	L	-	Site-specific DNA-cytosine methylase	2	1931496;1931507;4.0;CTG;CTGCTGCTGCTG**1931741;1931746;6.0;T;TTTTTT
opr_1035	orf_2292	1997314	1997526	+	S	YsdA	Uncharacterized membrane protein YsdA	3	1997321;1997329;3.0;CGG;CGGCGGCGG**1997332;1997338;7.0;T;TTTTTTT**1997428;1997438;2.2;TTCAA;TTCAATTCAAT
opr_1040	orf_2302	2007865	2008080	-	-	-	hypothetical protein	1	2007971;2007981;2.8;GTTT;GTTTGTTTGTT
opr_1046	orf_2313	2017884	2018093	-	-	-	hypothetical protein	2	2017910;2017916;7.0;T;TTTTTTT**2017945;2017951;7.0;T;TTTTTTT
	orf_2314	2018170	2018529	-	-	-	Immunity protein 8	2	2018379;2018388;5.0;TA;TATATATATA**2018512;2018524;2.2;TTTTAA;TTTTAATTTTAAT
opr_1048	orf_2318	2022254	2023216	-	-	-	hypothetical protein	2	2023168;2023178;2.2;ATAAA;ATAAAATAAAA**2023183;2023188;6.0;A;AAAAAA
opr_1055	orf_2335	2035435	2035614	+	-	-	hypothetical protein	0	-
	orf_2338	2037799	2038818	+	L	ngoBIR	cytosine-specific methyltransferase	3	2038010;2038016;7.0;A;AAAAAAA**2038355;2038360;6.0;A;AAAAAA**2038546;2038557;2.0;ATTGTC;ATTGTCATTGTC
	orf_2337	2036822	2037769	+	L	ngoBIM	Site-specific DNA-cytosine methylase	2	2037058;2037069;2.0;GGGATT;GGGATTGGGATT**2037442;2037448;7.0;A;AAAAAAA
opr_1061	orf_2351	2049397	2049609	-	-	-	hypothetical protein	2	2049491;2049500;2.5;GGGC;GGGCGGGCGG**2049510;2049517;2.0;CCGG;CCGGCCGG
opr_1063	orf_2359	2055942	2056601	+	E	-	ABC-type amino acid transport system	1	2056098;2056105;4.0;GC;GCGCGCGC
	orf_2360	2056633	2057259	+	E	-	ABC-type amino acid transport system	1	2057072;2057081;2.5;GCTC;GCTCGCTCGC
	orf_2362	2058105	2058959	+	ET	-	ABC-type amino acid transport/signal transduction system	2	2058336;2058359;2.0;GCCAAAGACCTG;GCCAAAGACCTGGCCAAAGACCTG**2058731;2058743;2.2;GTGGGC;GTGGGCGTGGGCG
	orf_2361	2057261	2057992	+	E	glnQ	ABC-type polar amino acid transport system	2	2057327;2057340;2.3;GACTTG;GACTTGGACTTGGA**2057933;2057939;7.0;T;TTTTTTT
opr_1066	orf_2375	2068946	2069128	+	-	-	hypothetical protein	0	-
opr_1094	orf_2424	2112866	2114518	+	M	HI_0275	Phosphoglycerol transferase MdoB or a related enzyme of AlkP superfamily	3	2112909;2112916;2.7;TGC;TGCTGCTG**2113274;2113282;3.0;GCG;GCGGCGGCG**2113550;2113558;3.0;GCC;GCCGCCGCC
opr_1095	orf_2426	2114941	2115783	-	M	-	Glycosyltransferase involved in cell wall bisynthesis	4	2115146;2115155;10.0;G;GGGGGGGGGG**2115343;2115349;2.3;GAG;GAGGAGG**2115589;2115598;3.3;GCC;GCCGCCGCCG**2115607;2115613;2.3;GTT;GTTGTTG
opr_1099	orf_2440	2127069	2127917	-	UW	-	Autotransporter adhesin	2	2127763;2127775;2.2;TCTGCC;TCTGCCTCTGCCT**2127896;2127907;2.0;TTGCTT;TTGCTTTTGCTT
opr_1105	orf_2453	2140908	2141330	-	V	-	Antitoxin component YwqK of the YwqJK toxin-antitoxin module	0	-
opr_1107	orf_2457	2143352	2143771	+	S	-	Uncharacterized protein	0	-
opr_1112	orf_2463	2153220	2153348	+	-	-	hypothetical protein	1	2153282;2153288;7.0;A;AAAAAAA
opr_1113	orf_2464	2153369	2153536	-	-	-	hypothetical protein	0	-
opr_1116	orf_2469	2158272	2159267	-	-	-	Haemoglobin-haptoglobin utilisation, porphyrin transporter	6	2158317;2158324;8.0;T;TTTTTTTT**2158590;2158600;2.2;AAAGG;AAAGGAAAGGA**2158641;2158648;2.7;CGG;CGGCGGCG**2158739;2158747;3.0;TGC;TGCTGCTGC**2159132;2159141;2.5;CGAG;CGAGCGAGCG**2159173;2159184;2.0;CCGGCG;CCGGCGCCGGCG
	orf_2468	2155815	2158244	-	P	hpuB	Outer membrane receptor for ferrienterochelin and colicins	16	2155888;2155896;3.0;TTG;TTGTTGTTG**2155975;2155983;3.0;GCG;GCGGCGGCG**2156240;2156249;2.0;TTGCC;TTGCCTTGCC**2156357;2156369;2.2;GGTTTT;GGTTTTGGTTTTG**2156391;2156401;2.2;TGCCG;TGCCGTGCCGT**2156796;2156805;3.3;GCT;GCTGCTGCTG**2157003;2157011;3.0;GCC;GCCGCCGCC**2157162;2157173;2.0;CCAAGT;CCAAGTCCAAGT**2157261;2157270;3.3;GCG;GCGGCGGCGG**2157283;2157295;2.2;TGGCGG;TGGCGGTGGCGGT**2157392;2157403;2.0;…
opr_1124	orf_2477	2166805	2166930	-	-	-	hypothetical protein	1	2166843;2166851;3.0;CCG;CCGCCGCCG
opr_1130	orf_2489	2174147	2174332	+	P	CadD	Cadmium resistance protein CadD	2	2174261;2174268;4.0;AT;ATATATAT**2174319;2174324;6.0;A;AAAAAA
opr_1135	orf_2500	2183993	2184130	+	-	-	hypothetical protein	0	-
opr_1140	orf_2515	2196257	2196973	+	N	-	Glycosyltransferase	3	2196432;2196440;3.0;ACA;ACAACAACA**2196667;2196672;6.0;T;TTTTTT**2196811;2196820;2.5;ACGG;ACGGACGGAC
	orf_2519	2199138	2199827	+	N	-	Glycosyltransferase	2	2199313;2199321;3.0;ACA;ACAACAACA**2199789;2199795;7.0;A;AAAAAAA
	orf_2516	2196973	2197812	+	M	lgtB	Glycosyltransferase involved in LPS biosynthesis	1	2197744;2197756;2.2;AGGGAA;AGGGAAAGGGAAA
	orf_2520	2199846	2200688	+	M	lgtE	Glycosyltransferase involved in LPS biosynthesis	1	2200608;2200623;2.0;GAAAAGAA;GAAAAGAAGAAAAGAA
	orf_2517	2197824	2198747	+	M	-	Lipopolysaccharide biosynthesis protein	5	2197981;2197993;13.0;G;GGGGGGGGGGGGG**2198230;2198237;2.0;AGGA;AGGAAGGA**2198239;2198247;2.2;ACAA;ACAAACAAA**2198314;2198322;3.0;GGC;GGCGGCGGC**2198380;2198392;2.2;ATCAGG;ATCAGGATCAGGA
opr_1144	orf_2533	2211602	2211727	-	-	-	hypothetical protein	1	2211704;2211715;2.0;GGGGCG;GGGGCGGGGGCG
opr_1147	orf_2541	2217540	2217674	+	-	-	hypothetical protein	0	-
Note： 1. The data of this table corresponds to N. gonorrhoeae 32867 genome. 2. Operon id; gene id; gene start; gene end; strand; COG id; gene name; function description; number of SSR; SSR attribute list are listed. 3. For SSR attribute, each SSR are separated by '**'. For each SSR; the attributes are listed as follows: start; end; period size; period sequence and complete sequence.
