# Supplementary material for: Genus-Wide Comparative Genomics Analysis of Neisseria to Identify New Genes Associated with Pathogenicity and Niche Adaptation of Neisseria Pathogens
Source: Int J Genomics. 2019 Jan 15;2019:6015730. doi: 10.1155/2019/6015730 (PMC6350579; doi:10.1155/2019/6015730)
Supplement: Supplementary 4 — Table S3: (A) UGNP in N. meningitidis MC58; (B) UGNMS in N. meningitidis MC58. [file 6015730.f4.xlsx]

## Sheet: UGNP_ref_N. meningitidis MC58
Table S3(A) UGNP in N. meningitidis MC58
##Operon_id	gene_id	gene start	gene end	strand	COG_id	gene_name	function description	number_of_SSR	SSR_attribute(start;end;psize;period;sequence)
opr_1	orf_1	7	498	-	R	YhbS	Predicted N-acetyltransferase YhbS	0	-
	orf_2	502	897	-	-	-	hypothetical protein	3	725;736;2.0;TTTTGC;TTTTGCTTTTGC**823;833;2.2;AAAAT;AAAATAAAATA**834;840;7.0;T;TTTTTTT
opr_6	orf_13	9346	10317	-	P	alx	Membrane protein TerC	4	9357;9363;7.0;T;TTTTTTT**9699;9705;7.0;T;TTTTTTT**10147;10154;2.0;CAGG;CAGGCAGG**10267;10274;8.0;A;AAAAAAAA
opr_26	orf_50	38144	38857	-	GR	-	Beta-phosphoglucomutase or related phosphatase	2	38172;38177;6.0;G;GGGGGG**38173;38186;2.0;GGGGGTA;GGGGGTAGGGGGTA
opr_35	orf_63	48260	51289	+	NW	-	Tfp pilus assembly protein	14	48352;48363;2.0;TGGTTT;TGGTTTTGGTTT**48407;48413;2.3;GTT;GTTGTTG**48417;48424;8.0;A;AAAAAAAA**48658;48666;3.0;CGG;CGGCGGCGG**48968;48973;6.0;A;AAAAAA**49436;49442;2.3;GGC;GGCGGCG**49914;49919;3.0;AA;AAAAAA**49973;49983;2.2;GAACG;GAACGGAACGG**50065;50077;2.2;CGGCAA;CGGCAACGGCAAC**50256;50267;2.0;TGTATG;TGTATGTGTATG**50294;50300;7.0;A;AAAAAAA**50602;50610;3.0;CGA;CGACGACGA**50910;50917;4.0;GC;GCGCG…
opr_38	orf_68	58704	59111	+	-	-	hypothetical protein	0	-
opr_40	orf_75	68296	70314	+	S	HI_0561	Uncharacterized membrane protein	8	68444;68452;3.0;CGG;CGGCGGCGG**68774;68785;2.0;GCGGCA;GCGGCAGCGGCA**69006;69016;2.2;TGCCG;TGCCGTGCCGT**69335;69345;2.2;TGGCT;TGGCTTGGCTT**69393;69402;3.3;CGC;CGCCGCCGCC**69468;69476;3.0;CGT;CGTCGTCGT**69899;69907;3.0;TCG;TCGTCGTCG**70041;70047;2.3;CAT;CATCATC
opr_41	orf_76	70358	70930	-	M	rfbC	dTDP-4-dehydrorhamnose 3	1	70846;70853;4.0;CG;CGCGCGCG
	orf_79	73081	74100	-	M	galE	UDP-glucose 4-epimerase	3	73102;73108;2.3;ATT;ATTATTA**73425;73435;2.2;GGGTA;GGGTAGGGTAG**74091;74097;7.0;T;TTTTTTT
opr_49	orf_102	99155	99352	+	-	-	Lambda repressor-like, DNA-binding domain	0	-
opr_62	orf_123	115902	116561	+	-	-	hypothetical protein	1	116264;116272;3.0;CGA;CGACGACGA
opr_66	orf_135	130438	130815	+	J	MBF1	Archaeal ribosome-binding protein aMBF1	0	-
	orf_137	131596	131847	+	C	fdx	Ferredoxin	0	-
opr_75	orf_156	153060	153359	+	J	rplW	Ribosomal protein L23	2	153229;153245;2.8;TTAAAG;TTAAAGGTAAAGTTAAA**153336;153348;2.2;GCTGCA;GCTGCAGCTGCAG
	orf_157	153365	154198	+	J	rplB	Ribosomal protein L2	3	153527;153535;3.0;GGT;GGTGGTGGT**153971;153977;7.0;A;AAAAAAA**154060;154070;3.7;TGG;TGGTGGTGGTG
	orf_158	154205	154483	+	J	rpsS	Ribosomal protein S19	0	-
opr_84	orf_180	172346	173602	-	E	dadA	Glycine/D-amino acid oxidase (deaminating)	0	-
	orf_181	173681	175210	-	E	HI_0883	Na+/alanine symporter	5	173722;173727;3.0;CG;CGCGCG**174289;174296;2.0;CTGC;CTGCCTGC**174743;174754;2.0;CATCCA;CATCCACATCCA**174992;175005;2.3;CAGCAT;CAGCATCAGCATCA**175183;175188;6.0;T;TTTTTT
opr_85	orf_192	185824	186990	-	S	YccC	Uncharacterized membrane protein YccC	6	185907;185913;2.3;GCA;GCAGCAG**186028;186040;2.2;GATGCG;GATGCGGATGCGG**186448;186457;3.3;GGC;GGCGGCGGCG**186454;186468;2.5;GGCGAT;GGCGATGGCGATGGC**186883;186897;2.5;GCGGTA;GCGGTAGCGGTAGCG**186931;186941;2.2;GTTGC;GTTGCGTTGCG
opr_99	orf_216	206324	207049	+	O	aat	Leu/Phe-tRNA-protein transferase	1	206489;206495;7.0;T;TTTTTTT
opr_104	orf_222	212715	214130	-	E	sdaA	L-serine deaminase	9	213393;213402;3.3;GCG;GCGGCGGCGG**213481;213491;2.2;GCGGC;GCGGCGCGGCG**213486;213495;3.3;GCG;GCGGCGGCGG**213603;213615;2.2;ATAGGG;ATAGGGATAGGGA**213623;213634;2.0;TTTCCG;TTTCCGTTTCCG**213669;213678;3.3;GCC;GCCGCCGCCG**213683;213690;2.7;AAT;AATAATAA**213955;213964;2.5;GCGA;GCGAGCGAGC**214017;214025;3.0;GGC;GGCGGCGGC
opr_105	orf_225	216872	217729	+	M	-	Small-conductance mechanosensitive channel	5	216945;216952;2.7;TGC;TGCTGCTG**216953;216960;4.0;GC;GCGCGCGC**217126;217136;3.7;GGC;GGCGGCGGCGG**217136;217143;2.7;GTC;GTCGTCGT**217616;217626;2.2;CGCTT;CGCTTCGCTTC
opr_107	orf_228	220476	221042	-	P	mntP	Putative Mn2+ efflux pump MntP	0	-
opr_111	orf_234	225071	226201	-	M	-	UDP-N-acetylglucosamine:LPS N-acetylglucosamine transferase	4	225456;225466;11.0;C;CCCCCCCCCCC**225548;225554;2.3;ATC;ATCATCA**225958;225964;7.0;T;TTTTTTT**226133;226138;6.0;T;TTTTTT
opr_114	orf_240	229547	230020	+	S	-	Uncharacterized protein	1	229854;229859;6.0;A;AAAAAA
opr_121	orf_254	244043	244678	+	R	-	Predicted spermidine synthase with an N-terminal membrane domain	6	244045;244058;2.0;GAAAATA;GAAAATAGAAAATA**244391;244398;2.7;GCT;GCTGCTGC**244443;244454;2.0;CCTTGC;CCTTGCCCTTGC**244462;244468;7.0;T;TTTTTTT**244550;244559;3.3;GCC;GCCGCCGCCG**244574;244579;6.0;T;TTTTTT
	orf_255	244758	246152	+	R	-	Predicted spermidine synthase with an N-terminal membrane domain	1	245197;245205;3.0;CTG;CTGCTGCTG
opr_127	orf_282	269252	269389	-	-	-	hypothetical protein	1	269366;269376;2.2;CGCCG;CGCCGCGCCGC
	orf_284	270055	270381	-	S	YkoI	Uncharacterized membrane protein YkoI	3	270064;270070;2.3;GCG;GCGGCGG**270254;270260;2.3;TTG;TTGTTGT**270255;270264;2.0;TGTTG;TGTTGTGTTG
opr_132	orf_298	281477	282175	+	O	-	Protein-disulfide isomerase	4	281588;281596;3.0;GCC;GCCGCCGCC**281656;281666;2.8;GCAG;GCAGGCAGGCA**281821;281831;3.7;CGC;CGCCGCCGCCG**282005;282012;4.0;GC;GCGCGCGC
opr_140	orf_309	292825	294051	+	M	HI_0392	Peptidoglycan/LPS O-acetylase OafA/YrhL	6	292893;292904;2.0;TTCTTT;TTCTTTTTCTTT**293188;293194;7.0;A;AAAAAAA**293237;293248;2.0;TTTTGA;TTTTGATTTTGA**293448;293457;2.5;TGCC;TGCCTGCCTG**293653;293664;2.4;CATTA;CATTACATTACA**294033;294043;2.2;GTTTG;GTTTGGTTTGG
opr_141	orf_310	294305	294583	+	M	YrhL	Peptidoglycan/LPS O-acetylase OafA/YrhL	1	294383;294394;2.4;TTTGA;TTTGATTTGATT
opr_145	orf_316	300379	300777	+	S	HI_0886	Uncharacterized membrane protein YphA	2	300718;300734;5.3;GCG;GCGGCGGCGGGCGGCGG**300720;300734;2.1;GGCGGCG;GGCGGCGGGCGGCGG
opr_155	orf_333	319258	319644	+	-	-	hypothetical protein	1	319585;319591;7.0;T;TTTTTTT
opr_160	orf_340	323483	324895	+	R	NMB0313	Putative Zn-dependent protease	4	323484;323495;4.0;TGC;TGCTGCTGCTGC**323886;323893;2.0;CCGT;CCGTCCGT**323935;323943;3.0;GGC;GGCGGCGGC**324173;324178;6.0;A;AAAAAA
opr_164	orf_347	330767	332317	+	G	emrB	Predicted arabinose efflux permease	6	331035;331044;3.3;CCG;CCGCCGCCGC**331199;331210;2.0;CTGGCA;CTGGCACTGGCA**331363;331374;2.0;GGAAAC;GGAAACGGAAAC**331898;331910;2.2;GGTGTC;GGTGTCGGTGTCG**331976;331983;2.0;GCAG;GCAGGCAG**332296;332307;4.0;CGG;CGGCGGCGGCGG
	orf_348	332331	332495	+	-	-	hypothetical protein	0	-
opr_166	orf_357	336507	336983	+	S	NMC1845	Uncharacterized membrane protein	2	336566;336574;3.0;CAA;CAACAACAA**336611;336617;2.3;GCA;GCAGCAG
opr_172	orf_367	347402	347578	-	-	-	hypothetical protein	1	347413;347424;2.0;TTTGAA;TTTGAATTTGAA
opr_176	orf_383	358788	358907	-	-	-	hypothetical protein	0	-
opr_185	orf_400	371248	372381	-	-	-	hypothetical protein	3	371524;371530;7.0;T;TTTTTTT**371970;371981;2.0;GCGAAA;GCGAAAGCGAAA**372370;372375;6.0;T;TTTTTT
opr_189	orf_408	375926	377329	-	U	-	Large exoprotein involved in heme utilization or adhesion	2	376071;376077;7.0;T;TTTTTTT**377020;377033;2.3;CGTGTC;CGTGTCCGTGTCCG
	orf_409	377333	378274	-	-	-	hypothetical protein	9	377345;377354;3.3;GCG;GCGGCGGCGG**377388;377398;2.2;TTGTT;TTGTTTTGTTT**377666;377702;2.1;GACGGTGACGAATACGTC;GACGGTGCCGAATACGTCGACGGTTACGAATACGTCG**377885;377895;3.7;GGC;GGCGGCGGCGG**377884;377900;2.8;GGGCGG;GGGCGGCGGCGGGGGCG**377947;377955;3.0;TGG;TGGTGGTGG**378014;378021;2.7;GCC;GCCGCCGC**378194;378203;3.3;GCC;GCCGCCGCCG**378254;378262;3.0;GAG;GAGGAGGAG
opr_194	orf_416	385175	385315	+	-	-	hypothetical protein	0	-
opr_198	orf_421	390665	392020	+	G	-	Na+/melibiose symporter or related transporter	2	391591;391598;2.7;GGC;GGCGGCGG**391964;391972;3.0;CTG;CTGCTGCTG
	orf_422	392024	393034	+	G	-	Galactose mutarotase or related enzyme	2	392450;392464;2.5;GATTTG;GATTTGGATTTGGAT**392479;392490;2.0;GGACGA;GGACGAGGACGA
opr_199	orf_423	393268	395526	+	G	malP	Trehalose and maltose hydrolase (possible phosphorylase)	6	394401;394407;2.3;CCG;CCGCCGC**394434;394441;4.0;CG;CGCGCGCG**394452;394459;2.0;GGCG;GGCGGGCG**394563;394581;2.1;CAACTACAC;CAACTACACCAACTACACC**394720;394737;6.0;AAC;AACAACATCAACAACAAC**395171;395178;2.7;AAG;AAGAAGAA
opr_200	orf_425	396382	397890	-	H	nadB	Aspartate oxidase	7	396945;396957;3.2;GATG;GATGGATGGATGG**397259;397270;2.0;ATGGCG;ATGGCGATGGCG**397292;397301;3.3;GTG;GTGGTGGTGG**397286;397292;2.3;GGC;GGCGGCG**397321;397329;3.0;GCC;GCCGCCGCC**397464;397473;3.3;GGC;GGCGGCGGCG**397735;397743;3.0;CGC;CGCCGCCGC
opr_201	orf_427	398426	399595	-	H	nadA	Quinolinate synthase	8	398723;398730;8.0;T;TTTTTTTT**398743;398749;2.3;CGG;CGGCGGC**398999;399010;2.4;ATACG;ATACGATACGAT**399058;399066;3.0;CGG;CGGCGGCGG**399080;399089;3.3;CAC;CACCACCACC**399238;399246;3.0;CCA;CCACCACCA**399524;399531;2.7;GGC;GGCGGCGG**399518;399531;2.0;GCGGCGG;GCGGCGGGCGGCGG
opr_202	orf_428	399740	400678	+	S	-	Uncharacterized conserved protein	5	399753;399766;2.3;CCGAAG;CCGAAGCCGAAGCC**399895;399904;2.5;GCAG;GCAGGCAGGC**400329;400340;2.0;ACTTCG;ACTTCGACTTCG**400466;400477;2.0;CTGCAA;CTGCAACTGCAA**400538;400545;2.7;CAG;CAGCAGCA
opr_203	orf_429	400896	401777	+	H	nadC	Nicotinate-nucleotide pyrophosphorylase	3	400999;401007;3.0;CCG;CCGCCGCCG**401108;401119;3.0;TCCG;TCCGTCCGTCCG**401252;401266;2.5;CGCCAC;CGCCACCGCCACCGC
opr_211	orf_452	423584	424747	+	M	-	Phosphoethanolamine transferase for periplasmic glucans (OPG)	3	423748;423754;7.0;A;AAAAAAA**424373;424380;2.0;AAAG;AAAGAAAG**424739;424744;6.0;A;AAAAAA
	orf_454	426242	426418	+	-	-	hypothetical protein	1	426256;426262;7.0;T;TTTTTTT
opr_213	orf_466	440181	440309	-	-	-	hypothetical protein	0	-
opr_214	orf_467	440420	441298	+	G	prpB	2-Methylisocitrate lyase and related enzymes	3	440557;440567;3.7;CGG;CGGCGGCGGCG**440629;440642;2.0;CGACGCA;CGACGCACGACGCA**441205;441212;2.7;GGT;GGTGGTGG
	orf_468	441384	442538	+	C	prpC	Citrate synthase	2	441667;441676;2.5;GCCT;GCCTGCCTGC**442323;442329;7.0;A;AAAAAAA
	orf_470	443557	446163	+	C	acnM	Aconitase A	7	444210;444223;2.3;CGTGGG;CGTGGGCGTGGGCG**444298;444311;2.0;AACGGCA;AACGGCAAACGGCA**444627;444637;2.2;ATTTG;ATTTGATTTGA**444823;444830;2.7;GCC;GCCGCCGC**444977;444988;2.0;TCGCCT;TCGCCTTCGCCT**445772;445781;3.3;TCA;TCATCATCAT**446085;446092;2.7;AGA;AGAAGAAG
opr_215	orf_472	446966	448135	+	C	prpF	2-Methylaconitate cis-trans-isomerase PrpF (2-methyl citrate pathway)	3	447055;447071;2.4;GCGGGAA;GCGGGAAGCGGGAAGCG**447795;447803;3.0;CCG;CCGCCGCCG**447924;447935;4.0;CCG;CCGCCGCCGCCG
opr_221	orf_478	451361	451474	+	-	-	hypothetical protein	0	-
opr_222	orf_481	454019	454864	+	R	-	Predicted amidohydrolase	5	454167;454175;3.0;TGC;TGCTGCTGC**454364;454374;2.2;GGACG;GGACGGGACGG**454621;454631;3.7;GCT;GCTGCTGCTGC**454630;454638;4.5;GC;GCGCGCGCG**454666;454674;3.0;GGC;GGCGGCGGC
opr_223	orf_482	453095	453967	-	E	-	Prephenate dehydrogenase	2	453520;453528;3.0;TGA;TGATGATGA**453907;453918;3.0;GAAC;GAACGAACGAAC
opr_234	orf_502	477806	480553	+	P	tbp1	Outer membrane receptor for ferrienterochelin and colicins	9	477808;477819;2.0;GCAACA;GCAACAGCAACA**478357;478366;2.5;AGGC;AGGCAGGCAG**478877;478882;6.0;A;AAAAAA**479346;479356;3.7;ATT;ATTATTATTAT**479408;479414;7.0;A;AAAAAAA**479664;479674;2.2;CGCAC;CGCACCGCACC**479781;479790;2.5;GGCG;GGCGGGCGGG**479952;479960;3.0;AAG;AAGAAGAAG**480092;480105;2.3;CGTGTC;CGTGTCCGTGTCCG
opr_240	orf_510	484863	484982	-	-	-	hypothetical protein	2	484869;484879;2.2;TGCCG;TGCCGTGCCGT**484899;484909;2.2;GGCGG;GGCGGGGCGGG
opr_241	orf_513	487702	487986	+	-	-	hypothetical protein	2	487740;487751;2.0;TGCCGC;TGCCGCTGCCGC**487895;487906;2.0;TGGAAG;TGGAAGTGGAAG
	orf_514	488153	490045	+	E	speA	Arginine decarboxylase (spermidine biosynthesis)	8	488329;488344;3.2;TGTTT;TGTTTTGTTTTGTTTT**488553;488566;2.0;CCGGCAA;CCGGCAACCGGCAA**488844;488850;7.0;A;AAAAAAA**489621;489632;2.4;CGCGC;CGCGCCGCGCCG**489707;489718;2.0;ATGCCT;ATGCCTATGCCT**489736;489743;2.7;GCC;GCCGCCGC**489811;489823;2.2;CACTGC;CACTGCCACTGCC**489826;489834;3.0;TGT;TGTTGTTGT
	orf_515	490144	491067	+	E	speB	Arginase family enzyme	0	-
opr_242	orf_516	491265	492731	+	G	-	Di- and tricarboxylate transporter	8	491676;491684;3.0;CTG;CTGCTGCTG**491708;491715;4.0;CG;CGCGCGCG**491713;491723;3.7;GCG;GCGGCGGCGGC**491935;491950;2.7;GGGCGT;GGGCGTGGGCGTGGGC**492185;492199;2.5;CGCCAC;CGCCACCGCCACCGC**492217;492228;2.0;TGCTTT;TGCTTTTGCTTT**492428;492435;2.0;TATG;TATGTATG**492682;492688;7.0;T;TTTTTTT
opr_244	orf_520	494237	495379	+	H	bioF	7-keto-8-aminopelargonate synthetase or related enzyme	6	494587;494597;3.7;GAC;GACGACGACGA**494718;494724;7.0;A;AAAAAAA**494815;494821;7.0;A;AAAAAAA**494933;494940;2.0;TTGG;TTGGTTGG**495073;495084;2.4;TTATT;TTATTTTATTTT**495107;495116;2.5;AAAG;AAAGAAAGAA
	orf_521	495389	496036	+	S	HI_1552	Uncharacterized protein	1	495536;495547;2.0;GATTTT;GATTTTGATTTT
	orf_522	496135	496806	+	QR	bioC	SAM-dependent methyltransferase	2	496667;496673;7.0;A;AAAAAAA**496776;496782;3.5;CG;CGCGCGC
opr_247	orf_529	502630	502908	-	-	-	hypothetical protein	0	-
	orf_530	502915	503199	-	-	-	hypothetical protein	1	503043;503054;2.0;TTGCAT;TTGCATTTGCAT
	orf_531	503207	503404	-	-	-	hypothetical protein	1	503347;503354;4.0;GA;GAGAGAGA
	orf_532	503409	503699	-	-	-	hypothetical protein	2	503556;503563;2.7;AGT;AGTAGTAG**503657;503663;7.0;T;TTTTTTT
	orf_533	503744	504778	-	L	NicK	DNA relaxase NicK	2	504062;504068;7.0;T;TTTTTTT**504716;504728;2.2;ACCGAA;ACCGAAACCGAAA
opr_252	orf_542	519142	520821	+	U	-	Hemolysin activation/secretion protein	5	519334;519345;2.4;TTTTC;TTTTCTTTTCTT**519360;519367;2.0;GAAA;GAAAGAAA**519715;519724;3.3;GAA;GAAGAAGAAG**519984;519990;7.0;A;AAAAAAA**520204;520212;3.0;CGC;CGCCGCCGC
opr_261	orf_568	546960	547478	+	S	-	Domain of Unknown Function (DUF1543)	1	547274;547283;3.3;CGC;CGCCGCCGCC
opr_263	orf_576	550963	552483	-	C	HI_1586	Na+/H+ antiporter NhaC	7	551081;551094;4.7;GCG;GCGGCGGCGGCGGC**551146;551153;4.0;GC;GCGCGCGC**551272;551280;3.0;GGC;GGCGGCGGC**551823;551831;3.0;CGA;CGACGACGA**552142;552153;2.4;CGCGC;CGCGCCGCGCCG**552289;552300;2.4;CCAAG;CCAAGCCAAGCC**552419;552431;2.2;AGTGCC;AGTGCCAGTGCCA
opr_265	orf_580	554997	555410	-	S	YqaA	Uncharacterized membrane protein YqaA	1	555188;555193;6.0;T;TTTTTT
opr_266	orf_582	556000	557223	+	G	gluP	Fucose permease	0	-
opr_269	orf_590	563096	563593	-	-	-	hypothetical protein	1	563291;563303;2.2;GGCTTT;GGCTTTGGCTTTG
opr_274	orf_598	571886	572275	-	NW	PilE	Tfp pilus assembly protein PilE	1	571975;571983;3.0;TGG;TGGTGGTGG
opr_278	orf_604	579248	580360	-	V	-	Uncharacterized protein involved in response to NO	5	579319;579327;3.0;CGG;CGGCGGCGG**579391;579401;3.7;CGG;CGGCGGCGGCG**579496;579502;2.3;CGC;CGCCGCC**579736;579746;3.7;CGG;CGGCGGCGGCG**579901;579908;4.0;GC;GCGCGCGC
opr_281	orf_609	584696	584968	-	-	-	hypothetical protein	0	-
opr_283	orf_617	589704	589820	-	-	-	hypothetical protein	0	-
opr_285	orf_619	590696	590911	-	S	HI_0173	Uncharacterized protein	2	590768;590779;2.0;GTCGCA;GTCGCAGTCGCA**590782;590788;7.0;T;TTTTTTT
	orf_620	590937	592034	-	H	apbE	Thiamine biosynthesis lipoprotein ApbE	4	591161;591167;2.3;TGA;TGATGAT**591317;591324;4.0;CG;CGCGCGCG**591327;591338;2.0;TTTGCC;TTTGCCTTTGCC**591633;591638;3.0;GT;GTGTGT
	orf_621	592145	593362	-	C	nqrF	Na+-transporting NADH:ubiquinone oxidoreductase	5	592527;592535;3.0;CCG;CCGCCGCCG**592849;592857;3.0;GAG;GAGGAGGAG**593107;593118;4.0;CGC;CGCCGCCGCCGC**593124;593132;3.0;ACG;ACGACGACG**593311;593323;2.2;CCAAAA;CCAAAACCAAAAC
	orf_622	593376	593969	-	C	nqrE	Na+-transporting NADH:ubiquinone oxidoreductase	2	593406;593418;2.2;CGCCAT;CGCCATCGCCATC**593810;593817;2.0;GGAC;GGACGGAC
	orf_623	593973	594599	-	C	nqrD	Na+-transporting NADH:ubiquinone oxidoreductase	1	594163;594169;2.3;AGC;AGCAGCA
	orf_624	594599	595327	-	C	nqrC	Na+-transporting NADH:ubiquinone oxidoreductase	2	594791;594796;6.0;T;TTTTTT**595091;595098;4.0;GC;GCGCGCGC
	orf_625	595368	596600	-	C	nqrB	Na+-transporting NADH:ubiquinone oxidoreductase	1	595615;595621;2.3;ACC;ACCACCA
	orf_626	596603	597946	-	C	nqrA	Na+-transporting NADH:ubiquinone oxidoreductase	4	596650;596661;2.0;CGTATT;CGTATTCGTATT**597275;597282;2.0;GTGC;GTGCGTGC**597551;597561;2.2;GCGCA;GCGCAGCGCAG**597677;597686;2.5;GACT;GACTGACTGA
opr_286	orf_629	599732	600022	-	-	-	hypothetical protein	4	599819;599824;6.0;A;AAAAAA**599939;599946;2.0;TTTA;TTTATTTA**599951;599959;2.2;AAAT;AAATAAATA**599983;599994;2.0;CGAAAA;CGAAAACGAAAA
opr_287	orf_633	602079	603179	+	E	gcvT	Glycine cleavage system T protein (aminomethyltransferase)	5	602755;602763;4.5;GC;GCGCGCGCG**602811;602819;3.0;GAC;GACGACGAC**602969;602976;4.0;GC;GCGCGCGC**603049;603061;2.2;CCATCG;CCATCGCCATCGC**603059;603066;4.0;CG;CGCGCGCG
opr_288	orf_636	605453	605974	+	K	-	Regulator of nitric oxide reductase transcription	2	605507;605512;6.0;T;TTTTTT**605842;605851;2.5;CGGG;CGGGCGGGCG
	orf_637	606028	607062	+	P	NosD	Nitrous oxidase accessory protein NosD	3	606828;606835;4.0;GC;GCGCGCGC**606885;606897;2.2;GGCGCA;GGCGCAGGCGCAG**606922;606928;2.3;GTG;GTGGTGG
	orf_638	607090	607740	+	V	nosF	ABC-type multidrug transport system	3	607438;607443;6.0;A;AAAAAA**607541;607551;2.2;GCCTT;GCCTTGCCTTG**607661;607671;2.2;GGCGC;GGCGCGGCGCG
	orf_640	608002	608373	+	P	NosL	Nitrous oxide reductase accessory protein NosL	1	608200;608209;2.5;TGGA;TGGATGGATG
opr_297	orf_666	633421	634485	-	ER	-	Threonine dehydrogenase or related Zn-dependent dehydrogenase	2	633879;633887;3.0;TGA;TGATGATGA**634100;634116;5.7;CCG;CCGCCGCCGCAGCCGCC
opr_300	orf_677	643532	644827	+	E	-	Glycine/D-amino acid oxidase (deaminating)	3	643645;643653;3.0;CGG;CGGCGGCGG**643929;643939;2.8;CCGT;CCGTCCGTCCG**644348;644355;4.0;GC;GCGCGCGC
opr_301	orf_678	645072	646529	-	P	AmtB	Ammonia channel protein AmtB	5	645582;645593;2.0;CGCCAT;CGCCATCGCCAT**645596;645605;3.3;CCG;CCGCCGCCGC**645635;645653;2.1;AGCCGAACC;AGCCGAACCAGCCGAACCA**645825;645833;3.0;GCC;GCCGCCGCC**646186;646193;8.0;T;TTTTTTTT
opr_310	orf_691	657534	658292	+	G	-	Glycosyltransferase	4	657578;657584;3.5;AT;ATATATA**657745;657754;2.5;TCAA;TCAATCAATC**657855;657860;6.0;T;TTTTTT**658079;658089;2.2;TTCTT;TTCTTTTCTTT
opr_312	orf_700	666451	667968	-	P	fbpB2	ABC-type Fe3+ transport system	6	666526;666535;3.3;GGC;GGCGGCGGCG**666598;666606;3.0;CAG;CAGCAGCAG**667151;667157;7.0;A;AAAAAAA**667322;667331;3.3;TTG;TTGTTGTTGT**667476;667482;7.0;A;AAAAAAA**667953;667959;7.0;T;TTTTTTT
	orf_701	668036	669031	-	P	fbpA	ABC-type Fe3+ transport system	4	668377;668385;3.0;AGT;AGTAGTAGT**668384;668390;2.3;GTT;GTTGTTG**668649;668657;3.0;ACG;ACGACGACG**668830;668838;3.0;CTT;CTTCTTCTT
opr_314	orf_704	670447	670830	-	-	-	hypothetical protein	2	670602;670608;7.0;T;TTTTTTT**670629;670637;3.0;CGG;CGGCGGCGG
opr_315	orf_713	675650	677476	+	-	MafB	Neisseria toxin MafB	3	675707;675715;2.2;ATGC;ATGCATGCA**676088;676096;3.0;GGC;GGCGGCGGC**676834;676840;2.3;GCC;GCCGCCG
opr_319	orf_721	682235	683176	+	-	-	hypothetical protein	9	682247;682255;3.0;CTC;CTCCTCCTC**682306;682315;3.3;CGG;CGGCGGCGGC**682500;682507;2.7;ACA;ACAACAAC**682554;682562;3.0;CCA;CCACCACCA**682614;682624;3.7;CCG;CCGCCGCCGCC**682807;682843;2.1;CGACGTATTCGGAACCGT;CGACGTATTCGTAACCGTCGACGTATTCGGCACCGTC**683111;683121;2.2;AAACA;AAACAAAACAA**683155;683164;3.3;CCG;CCGCCGCCGC**683167;683173;2.3;AGG;AGGAGGA
	orf_722	683180	684448	+	U	-	Large exoprotein involved in heme utilization or adhesion	1	683476;683489;2.3;CGGACA;CGGACACGGACACG
opr_323	orf_729	690298	690822	-	M	-	Opacity protein and related surface antigens	1	690511;690518;4.0;GC;GCGCGCGC
opr_330	orf_740	702451	703017	+	S	-	Uncharacterized protein	3	702497;702507;2.2;CCGCC;CCGCCCCGCCC**702563;702569;7.0;A;AAAAAAA**702950;702956;2.3;GCG;GCGGCGG
	orf_743	704049	704450	+	S	YsdA	Uncharacterized membrane protein YsdA	0	-
	orf_744	704471	704668	+	-	-	hypothetical protein	0	-
opr_333	orf_749	707817	708041	+	O	NMB0681	TusA-related sulfurtransferase	0	-
opr_338	orf_765	718479	719477	-	M	-	Membrane protein involved in colicin uptake	7	718698;718703;6.0;T;TTTTTT**718751;718756;6.0;T;TTTTTT**718802;718808;7.0;T;TTTTTTT**718931;718955;4.2;CTTTGG;CTTTGGCTTTGGGCTTGGCTTTGGC**719255;719263;3.0;CGG;CGGCGGCGG**719408;719418;3.7;GGC;GGCGGCGGCGG**719459;719469;2.8;TTTG;TTTGTTTGTTT
opr_340	orf_774	725708	731155	-	MU	iga	Type V secretory pathway	18	726088;726098;2.8;ATTG;ATTGATTGATT**726453;726459;7.0;T;TTTTTTT**726596;726607;2.0;GGCTTG;GGCTTGGGCTTG**726733;726745;2.2;CATCTT;CATCTTCATCTTC**727242;727249;2.7;GCT;GCTGCTGC**727593;727606;2.3;GCTTGG;GCTTGGGCTTGGGC**728052;728064;2.2;TCTGCT;TCTGCTTCTGCTT**728143;728151;3.0;CGA;CGACGACGA**728247;728255;3.0;CGG;CGGCGGCGG**729258;729276;2.1;AAACCGCTA;AAACCGCTAAAACCGCTAA**729316;729324;3.0;CTT;CTTCT…
opr_345	orf_780	736948	737895	-	R	yocS	Predicted Na+-dependent transporter	4	737057;737064;2.7;GCG;GCGGCGGC**737072;737079;2.7;GCG;GCGGCGGC**737608;737617;2.5;GGCA;GGCAGGCAGG**737819;737829;3.7;GCG;GCGGCGGCGGC
	orf_781	737973	738164	-	-	-	hypothetical protein	0	-
opr_350	orf_793	747478	747768	+	CP	-	NhaP-type Na+/H+ and K+/H+ antiporter with C-terminal TrkAC and CorC domains	1	747579;747588;2.5;ACTT;ACTTACTTAC
opr_354	orf_809	761675	761965	+	K	-	DNA-binding transcriptional regulator	0	-
opr_369	orf_842	788611	788907	-	-	-	hypothetical protein	0	-
opr_374	orf_857	801047	801163	+	-	-	hypothetical protein	1	801106;801113;8.0;A;AAAAAAAA
	orf_861	802373	802792	+	S	-	secreted protein	3	802376;802382;7.0;A;AAAAAAA**802461;802470;3.3;ACA;ACAACAACAA**802531;802537;7.0;A;AAAAAAA
	orf_862	802813	803574	+	H	-	Uroporphyrinogen-III synthase	4	802843;802853;2.8;GTCC;GTCCGTCCGTC**803070;803081;2.4;AGGGC;AGGGCAGGGCAG**803218;803227;2.5;GGCG;GGCGGGCGGG**803338;803346;3.0;GCC;GCCGCCGCC
opr_377	orf_870	809675	810154	-	S	-	Uncharacterized conserved protein	1	809689;809694;6.0;T;TTTTTT
opr_378	orf_871	810396	810755	-	P	-	Rhodanese-related sulfurtransferase	0	-
opr_379	orf_874	815681	816508	+	ET	HI_1080	ABC-type amino acid transport/signal transduction system	0	-
	orf_875	816531	817214	+	E	HI_1079	ABC-type amino acid transport system	1	817031;817039;2.2;CTCG;CTCGCTCGC
	orf_876	817224	817979	+	E	tcyC	ABC-type polar amino acid transport system	4	817437;817442;6.0;A;AAAAAA**817665;817674;3.3;CAG;CAGCAGCAGC**817859;817867;3.0;CGT;CGTCGTCGT**817874;817881;2.7;CGG;CGGCGGCG
opr_386	orf_891	830527	831192	+	C	HI_1278	Nitroreductase	0	-
opr_390	orf_906	844861	845814	-	O	htpX	Zn-dependent protease with chaperone function	2	845235;845247;2.2;TCAGCG;TCAGCGTCAGCGT**845472;845481;3.3;CTT;CTTCTTCTTC
opr_397	orf_925	867067	867783	+	-	-	hypothetical protein	3	867086;867094;3.0;CCG;CCGCCGCCG**867627;867634;2.0;TATT;TATTTATT**867694;867699;3.0;CC;CCCCCC
opr_398	orf_929	871383	871706	+	-	-	hypothetical protein	2	871386;871391;6.0;A;AAAAAA**871551;871561;2.8;ATGT;ATGTATGTATG
opr_399	orf_931	872909	873517	-	M	-	Glycosyltransferase involved in cell wall bisynthesis	1	873135;873145;3.7;TCG;TCGTCGTCGTC
opr_401	orf_936	875807	876223	-	S	-	Uncharacterized conserved protein	0	-
	orf_941	880841	881506	-	R	-	Predicted double-glycine peptidase	2	881257;881266;3.3;CTT;CTTCTTCTTC**881328;881339;2.0;AAATCC;AAATCCAAATCC
opr_403	orf_950	885526	886395	-	-	PagP	outer membrane enzyme PagP	7	885574;885589;2.0;TGAAACGT;TGAAACGTTGAAACGT**885619;885630;2.0;GAAACC;GAAACCGAAACC**885680;885690;2.8;CCGT;CCGTCCGTCCG**885697;885705;2.2;CTGC;CTGCCTGCC**886084;886096;2.2;GCTGCC;GCTGCCGCTGCCG**886279;886293;2.1;AGTTTCC;AGTTTCCAGTTTCCA**886363;886380;2.0;GGCGGGCAA;GGCGGGCAAGGCGGGCAA
opr_404	orf_951	886559	887482	+	J	-	Pseudouridylate synthase	2	887081;887091;2.2;CAAAA;CAAAACAAAAC**887440;887450;2.2;GTCGG;GTCGGGTCGGG
opr_416	orf_970	903916	904425	+	S	HI_0318	Uncharacterized protein YpbQ	2	903925;903942;2.0;ATTTTAAGC;ATTTTAAGCATTTTAAGC**904360;904367;2.0;ATTT;ATTTATTT
opr_437	orf_1012	932130	934355	-	C	icd	Monomeric isocitrate dehydrogenase	6	932205;932211;2.3;GTA;GTAGTAG**932211;932217;2.3;GCC;GCCGCCG**932626;932634;3.0;CCG;CCGCCGCCG**933042;933054;2.2;GACTTG;GACTTGGACTTGG**933880;933887;8.0;T;TTTTTTTT**934219;934226;4.0;GA;GAGAGAGA
opr_438	orf_1014	934755	935903	+	M	lst	Transfers sialic acid from the substrate CMP-sialic acid donor to the terminal beta-D-galactosyl-1,4-acetyl-beta-D- glucosamine on the lacto-N-neotetraose branch of the lipooligosaccharide	6	935056;935064;3.0;ATT;ATTATTATT**935176;935184;3.0;TGC;TGCTGCTGC**935304;935312;3.0;AGC;AGCAGCAGC**935366;935374;3.0;GAT;GATGATGAT**935461;935468;2.7;GCC;GCCGCCGC**935752;935762;2.2;GCGGC;GCGGCGCGGCG
opr_441	orf_1017	937517	938086	-	I	HI_0827	Acyl-CoA hydrolase	3	937733;937739;2.3;GAC;GACGACG**937826;937834;3.0;GCC;GCCGCCGCC**938017;938032;2.0;CGGGAAGT;CGGGAAGTCGGGAAGT
opr_448	orf_1030	950338	950616	+	-	-	hypothetical protein	0	-
opr_449	orf_1033	952437	953228	-	X	-	Transposase	1	952471;952477;7.0;T;TTTTTTT
opr_450	orf_1037	955257	955457	+	-	-	hypothetical protein	2	955279;955285;7.0;T;TTTTTTT**955281;955292;2.0;TTTTTC;TTTTTCTTTTTC
opr_455	orf_1056	974083	975249	+	C	sucC	Succinyl-CoA synthetase	3	974235;974241;2.3;CGG;CGGCGGC**974953;974962;3.3;GGC;GGCGGCGGCG**975101;975113;2.2;TCAACG;TCAACGTCAACGT
	orf_1057	975260	976150	+	C	sucD	Succinyl-CoA synthetase	4	975789;975801;2.2;GTATCG;GTATCGGTATCGG**975874;975882;3.0;CAT;CATCATCAT**975908;975917;3.3;GAA;GAAGAAGAAG**975929;975939;2.2;ATCCA;ATCCAATCCAA
opr_457	orf_1061	981343	982140	+	I	psd	Phosphatidylserine decarboxylase	2	981932;981945;2.0;TGGCGAT;TGGCGATTGGCGAT**982001;982027;2.2;CTGAATCTGAGC;CTGAATCTGAGCCTGAATCTGAGCCTG
opr_460	orf_1066	988452	989486	+	L	NicK	DNA relaxase NicK	2	988502;988514;2.2;TTTCGG;TTTCGGTTTCGGT**989162;989168;7.0;A;AAAAAAA
	orf_1067	989531	989821	+	-	-	hypothetical protein	2	989567;989573;7.0;A;AAAAAAA**989686;989692;2.3;CGG;CGGCGGC
	orf_1068	989826	990023	+	-	-	hypothetical protein	1	989876;989883;4.0;TC;TCTCTCTC
	orf_1069	990031	990315	+	-	-	hypothetical protein	1	990176;990187;2.0;ATGCAA;ATGCAAATGCAA
	orf_1070	990322	990600	+	-	-	hypothetical protein	0	-
opr_463	orf_1073	992395	993780	-	C	pntB	NAD/NADP transhydrogenase beta subunit	4	992524;992532;3.0;GAC;GACGACGAC**993325;993334;3.3;GCT;GCTGCTGCTG**993595;993603;3.0;GAT;GATGATGAT**993630;993635;6.0;A;AAAAAA
	orf_1074	993860	994243	-	S	-	Uncharacterized conserved protein	3	993980;993989;2.5;CAGG;CAGGCAGGCA**994042;994051;3.3;CGG;CGGCGGCGGC**994192;994197;6.0;A;AAAAAA
	orf_1075	994247	995788	-	C	pntA	NAD/NADP transhydrogenase alpha subunit	9	994384;994392;3.0;CGA;CGACGACGA**994391;994397;2.3;GAT;GATGATG**994463;994469;2.3;GTA;GTAGTAG**994925;994934;3.3;CGC;CGCCGCCGCC**995021;995027;2.3;GGT;GGTGGTG**995026;995036;3.7;TGA;TGATGATGATG**995170;995180;2.2;TCGAT;TCGATTCGATT**995308;995316;3.0;CGG;CGGCGGCGG**995416;995424;4.5;GC;GCGCGCGCG
opr_464	orf_1078	996975	998198	+	P	ClcA	H+/Cl- antiporter ClcA	4	997070;997084;2.1;GCATACG;GCATACGGCATACGG**997296;997302;2.3;CTG;CTGCTGC**997382;997388;2.3;CGG;CGGCGGC**997979;997987;3.0;TGC;TGCTGCTGC
opr_472	orf_1097	1010149	1011240	-	I	AidB	Acyl-CoA dehydrogenase related to the alkylation response protein AidB	6	1010299;1010307;3.0;GGC;GGCGGCGGC**1010319;1010328;3.3;CGG;CGGCGGCGGC**1010371;1010382;2.4;CCAAG;CCAAGCCAAGCC**1010473;1010479;2.3;GAC;GACGACG**1010491;1010497;2.3;GAT;GATGATG**1010524;1010535;2.0;GCCGAT;GCCGATGCCGAT
	orf_1099	1012078	1012449	-	S	-	Protein of unknown function (DUF2628)	1	1012315;1012328;2.3;CAGCCC;CAGCCCCAGCCCCA
opr_475	orf_1105	1020188	1020367	-	-	-	hypothetical protein	1	1020328;1020334;2.3;CGA;CGACGAC
opr_479	orf_1124	1029709	1030242	+	X	insK	Transposase InsO and inactivated derivatives	0	-
opr_481	orf_1136	1040572	1040934	-	V	RidA	Enamine deaminase RidA	2	1040659;1040669;2.8;GCGG;GCGGGCGGGCG**1040783;1040792;2.5;GCCA;GCCAGCCAGC
opr_482	orf_1138	1041511	1042233	+	S	-	Uncharacterized membrane protein	3	1041873;1041881;3.0;CGG;CGGCGGCGG**1041946;1042008;2.1;ATGCCCATAGTCGGCGTGATTCTCGCCTAT;ATGCCCATAGTCGGCGTGATTTTCGCCTATATGCCCATAGTCGGCGTGATTCTCGCCTATATG**1042135;1042143;3.0;ATT;ATTATTATT
opr_483	orf_1140	1043182	1044627	-	E	aspA	Aspartate ammonia-lyase	7	1043230;1043238;3.0;TTC;TTCTTCTTC**1043538;1043544;2.3;TCG;TCGTCGT**1043944;1043952;3.0;TTC;TTCTTCTTC**1043953;1043960;2.7;CAA;CAACAACA**1044361;1044370;3.3;GGC;GGCGGCGGCG**1044423;1044435;2.2;TCACCA;TCACCATCACCAT**1044470;1044475;3.0;TG;TGTGTG
opr_484	orf_1146	1049766	1050020	-	-	-	hypothetical protein	2	1049888;1049910;1.9;GTTCGGCGGCGC;GTTCGGCGGCGCGTTCGGCGGCG**1049903;1049912;3.3;CGG;CGGCGGCGGC
opr_487	orf_1152	1054886	1056166	+	S	YkwD	Uncharacterized conserved protein YkwD	2	1055249;1055258;3.3;GAA;GAAGAAGAAG**1055258;1055264;2.3;GCC;GCCGCCG
opr_490	orf_1157	1061542	1062336	-	T	RIO1	Serine/threonine-protein kinase RIO1	4	1061561;1061578;2.0;AGGGAAATC;AGGGAAATCAGGGAAATC**1061598;1061608;2.2;CGTCC;CGTCCCGTCCC**1061852;1061857;6.0;T;TTTTTT**1062206;1062216;2.8;TGCC;TGCCTGCCTGC
	orf_1159	1063864	1064235	-	-	-	hypothetical protein	1	1064188;1064194;2.3;GCC;GCCGCCG
opr_491	orf_1160	1064487	1065956	-	S	-	integral membrane protein	6	1064556;1064563;4.0;CA;CACACACA**1065041;1065046;6.0;T;TTTTTT**1065405;1065411;7.0;T;TTTTTTT**1065454;1065460;2.3;CCG;CCGCCGC**1065664;1065672;3.0;GCG;GCGGCGGCG**1065738;1065747;3.3;CGC;CGCCGCCGCC
opr_492	orf_1162	1066212	1067126	+	K	-	DNA-binding transcriptional regulator	1	1066385;1066395;2.8;GCGG;GCGGGCGGGCG
opr_498	orf_1171	1075579	1075773	-	-	-	hypothetical protein	2	1075731;1075740;2.5;AATC;AATCAATCAA**1075750;1075757;2.0;ACCA;ACCAACCA
opr_499	orf_1172	1075994	1077769	-	E	-	Gamma-glutamyltranspeptidase	1	1077300;1077315;2.3;CGACCAC;CGACCACCGACCACCG
opr_511	orf_1192	1097434	1097667	-	-	-	hypothetical protein	2	1097572;1097585;2.0;TGTTTTT;TGTTTTTTGTTTTT**1097574;1097579;6.0;T;TTTTTT
opr_515	orf_1206	1106919	1107101	+	-	-	hypothetical protein	2	1106974;1106989;2.0;AAGACGGC;AAGACGGCAAGACGGC**1107040;1107052;2.2;AAAATC;AAAATCAAAATCA
opr_523	orf_1237	1129189	1131162	+	S	-	Microcystin-dependent protein (function unknown)	6	1129224;1129237;2.3;CGACGG;CGACGGCGACGGCG**1130134;1130144;2.8;GGCT;GGCTGGCTGGC**1130655;1130667;2.2;CCACAC;CCACACCCACACC**1130955;1130964;3.3;CGC;CGCCGCCGCC**1131085;1131092;4.0;AG;AGAGAGAG**1131120;1131131;4.0;CCG;CCGCCGCCGCCG
opr_529	orf_1247	1135662	1136300	-	S	NMB1124	Uncharacterized protein	3	1135827;1135839;2.2;GCTGTT;GCTGTTGCTGTTG**1136120;1136130;2.2;GCGGC;GCGGCGCGGCG**1136188;1136194;2.3;ACC;ACCACCA
	orf_1248	1136306	1136674	-	S	-	Uncharacterized protein	2	1136470;1136476;7.0;T;TTTTTTT**1136580;1136587;2.7;TAA;TAATAATA
	orf_1249	1136684	1137355	-	M	NMB1126	Curli biogenesis system outer membrane secretion channel CsgG	2	1136877;1136888;2.0;TTGACG;TTGACGTTGACG**1136913;1136928;2.3;GCGATTT;GCGATTTGCGATTTGC
opr_530	orf_1255	1143000	1143671	+	S	-	T5orf172	2	1143186;1143199;2.3;AAAGAA;AAAGAAAAAGAAAA**1143328;1143339;2.0;CGGAAT;CGGAATCGGAAT
	orf_1256	1143708	1144469	+	S	NMB1133	Uncharacterized conserved protein YegJ	4	1143811;1143816;6.0;T;TTTTTT**1143822;1143830;3.0;CGC;CGCCGCCGC**1143877;1143896;2.2;AAGACGGCG;AAGACGGCGAAGACGGCGAA**1144415;1144424;2.5;TGCC;TGCCTGCCTG
opr_532	orf_1259	1145288	1145842	-	-	-	hypothetical protein	3	1145349;1145360;2.0;TTGATT;TTGATTTTGATT**1145463;1145473;2.2;GCGGC;GCGGCGCGGCG**1145461;1145474;5.0;CGG;CGGCGGCGCGGCGG
opr_538	orf_1273	1157355	1159124	-	P	cysI1	Sulfite reductase	6	1158510;1158516;2.3;GTC;GTCGTCG**1158517;1158530;2.0;GAACTTT;GAACTTTGAACTTT**1158544;1158549;3.0;CA;CACACA**1158560;1158565;3.0;CG;CGCGCG**1158671;1158679;3.0;CCG;CCGCCGCCG**1158857;1158871;2.1;CCGGCAG;CCGGCAGCCGGCAGC
	orf_1274	1159151	1160950	-	P	cysJ1	Sulfite reductase	7	1159309;1159314;3.0;GC;GCGCGC**1160010;1160017;4.0;GC;GCGCGCGC**1160335;1160343;3.0;CTT;CTTCTTCTT**1160591;1160604;2.3;TTCGCC;TTCGCCTTCGCCTT**1160618;1160626;3.0;CAG;CAGCAGCAG**1160626;1160632;2.3;GGC;GGCGGCG**1160710;1160716;2.3;CCG;CCGCCGC
	orf_1275	1160962	1162248	-	P	-	Sulfate adenylyltransferase subunit 1	1	1161024;1161032;3.0;CGG;CGGCGGCGG
opr_542	orf_1282	1167698	1168336	-	S	NMB1124	Uncharacterized protein	3	1167863;1167875;2.2;GCTGTT;GCTGTTGCTGTTG**1168156;1168166;2.2;GCGGC;GCGGCGCGGCG**1168224;1168230;2.3;ACC;ACCACCA
	orf_1283	1168342	1168710	-	S	-	Uncharacterized protein	2	1168506;1168512;7.0;T;TTTTTTT**1168616;1168623;2.7;TAA;TAATAATA
	orf_1284	1168720	1169391	-	M	NMB1126	Curli biogenesis system outer membrane secretion channel CsgG	2	1168913;1168924;2.0;TTGACG;TTGACGTTGACG**1168949;1168964;2.3;GCGATTT;GCGATTTGCGATTTGC
opr_543	orf_1290	1175036	1175707	+	S	-	T5orf172	2	1175222;1175235;2.3;AAAGAA;AAAGAAAAAGAAAA**1175364;1175375;2.0;CGGAAT;CGGAATCGGAAT
	orf_1291	1175744	1176505	+	S	NMB1133	Uncharacterized conserved protein YegJ	4	1175847;1175852;6.0;T;TTTTTT**1175858;1175866;3.0;CGC;CGCCGCCGC**1175913;1175932;2.2;AAGACGGCG;AAGACGGCGAAGACGGCGAA**1176451;1176460;2.5;TGCC;TGCCTGCCTG
opr_545	orf_1294	1177324	1177878	-	-	-	hypothetical protein	3	1177385;1177396;2.0;TTGATT;TTGATTTTGATT**1177499;1177509;2.2;GCGGC;GCGGCGCGGCG**1177497;1177510;5.0;CGG;CGGCGGCGCGGCGG
opr_551	orf_1308	1189391	1191160	-	P	cysI1	Sulfite reductase	6	1190546;1190552;2.3;GTC;GTCGTCG**1190553;1190566;2.0;GAACTTT;GAACTTTGAACTTT**1190580;1190585;3.0;CA;CACACA**1190596;1190601;3.0;CG;CGCGCG**1190707;1190715;3.0;CCG;CCGCCGCCG**1190893;1190907;2.1;CCGGCAG;CCGGCAGCCGGCAGC
	orf_1309	1191187	1192986	-	P	cysJ1	Sulfite reductase	7	1191345;1191350;3.0;GC;GCGCGC**1192046;1192053;4.0;GC;GCGCGCGC**1192371;1192379;3.0;CTT;CTTCTTCTT**1192627;1192640;2.3;TTCGCC;TTCGCCTTCGCCTT**1192654;1192662;3.0;CAG;CAGCAGCAG**1192662;1192668;2.3;GGC;GGCGGCG**1192746;1192752;2.3;CCG;CCGCCGC
	orf_1310	1192998	1194284	-	P	-	Sulfate adenylyltransferase subunit 1	1	1193060;1193068;3.0;CGG;CGGCGGCGG
opr_559	orf_1323	1209973	1210290	-	K	-	Transcriptional regulator	3	1210047;1210055;3.0;GCA;GCAGCAGCA**1210063;1210069;2.3;CGC;CGCCGCC**1210079;1210087;3.0;GCC;GCCGCCGCC
opr_565	orf_1334	1222922	1223047	+	-	-	hypothetical protein	0	-
opr_583	orf_1371	1254120	1254797	-	H	mobA	Molybdopterin-guanine dinucleotide biosynthesis protein A	1	1254199;1254207;3.0;TGC;TGCTGCTGC
opr_584	orf_1372	1254939	1256711	+	T	-	Signal transduction histidine kinase	4	1255219;1255228;2.5;CCAT;CCATCCATCC**1255307;1255312;3.0;CC;CCCCCC**1255405;1255411;7.0;A;AAAAAAA**1255846;1255857;2.0;ATGTTT;ATGTTTATGTTT
	orf_1373	1256771	1257364	+	TK	-	DNA-binding response regulator	3	1256932;1256938;2.3;GCA;GCAGCAG**1257000;1257008;4.5;GC;GCGCGCGCG**1257314;1257320;2.3;GCC;GCCGCCG
opr_586	orf_1377	1260193	1260381	+	-	-	hypothetical protein	1	1260244;1260251;2.7;TTC;TTCTTCTT
opr_594	orf_1398	1277271	1278386	-	G	glxK	Glycerate kinase	3	1277586;1277593;2.0;CAGG;CAGGCAGG**1277659;1277670;2.0;GCTCCT;GCTCCTGCTCCT**1277990;1278001;2.0;CGCCAA;CGCCAACGCCAA
	orf_1400	1279679	1281283	-	R	-	Predicted regulatory domain of a methyltransferase	9	1279706;1279723;2.0;GTCTGCCAA;GTCTGCCAAGTCTGCCAA**1279946;1279954;3.0;GGC;GGCGGCGGC**1280566;1280571;6.0;T;TTTTTT**1280588;1280597;3.3;GCC;GCCGCCGCCG**1280656;1280667;2.0;TCCGCG;TCCGCGTCCGCG**1280938;1280943;6.0;T;TTTTTT**1280968;1280977;2.5;CCTG;CCTGCCTGCC**1281081;1281092;2.0;GCGGGC;GCGGGCGCGGGC**1281111;1281118;4.0;GC;GCGCGCGC
opr_595	orf_1405	1283700	1284683	+	S	-	Uncharacterized protein	5	1284027;1284036;3.3;GCC;GCCGCCGCCG**1284103;1284108;6.0;A;AAAAAA**1284511;1284517;2.3;GCG;GCGGCGG**1284539;1284552;2.3;CGTCAA;CGTCAACGTCAACG**1284634;1284639;6.0;A;AAAAAA
	orf_1406	1284851	1285873	+	E	-	Lysophospholipase L1 or related esterase	6	1285162;1285173;3.0;AGCA;AGCAAGCAAGCA**1285249;1285258;3.3;CGG;CGGCGGCGGC**1285492;1285502;3.7;CAA;CAACAACAACA**1285560;1285570;2.8;GCCT;GCCTGCCTGCC**1285581;1285588;2.7;TCA;TCATCATC**1285848;1285858;2.2;TCCGC;TCCGCTCCGCT
	orf_1408	1286160	1287713	+	IQ	-	Acyl-CoA synthetase (AMP-forming)/AMP-acid ligase II	10	1286195;1286204;3.3;CGC;CGCCGCCGCC**1286213;1286224;2.0;AAACGG;AAACGGAAACGG**1286221;1286231;2.2;ACGGC;ACGGCACGGCA**1286262;1286268;3.5;CG;CGCGCGC**1286839;1286847;3.0;TGC;TGCTGCTGC**1286883;1286898;2.0;TCCGTTTT;TCCGTTTTTCCGTTTT**1287031;1287039;3.0;GCG;GCGGCGGCG**1287374;1287386;2.2;CTTTAT;CTTTATCTTTATC**1287447;1287455;3.0;GAA;GAAGAAGAA**1287480;1287489;3.3;GCC;GCCGCCGCCG
opr_596	orf_1409	1287803	1289830	-	M	HI_1706	Choline-glycine betaine transporter	12	1287857;1287864;2.7;CAA;CAACAACA**1288221;1288232;2.0;TCCTGC;TCCTGCTCCTGC**1288362;1288374;2.2;ATCAGC;ATCAGCATCAGCA**1288445;1288457;2.2;AACGGC;AACGGCAACGGCA**1288845;1288853;3.0;CAC;CACCACCAC**1289015;1289022;2.7;CAG;CAGCAGCA**1289009;1289014;6.0;A;AAAAAA**1289347;1289359;2.2;AAGCCA;AAGCCAAAGCCAA**1289366;1289375;2.0;CGTAC;CGTACCGTAC**1289423;1289432;3.3;CTG;CTGCTGCTGC**1289751;1289759;4.5;AC;AC…
opr_598	orf_1414	1293559	1294986	-	I	AidB	Acyl-CoA dehydrogenase related to the alkylation response protein AidB	2	1294001;1294009;3.0;GCG;GCGGCGGCG**1294976;1294981;3.0;GT;GTGTGT
opr_602	orf_1426	1309320	1309439	-	-	-	hypothetical protein	1	1309418;1309428;3.7;CGC;CGCCGCCGCCG
opr_603	orf_1427	1309601	1309927	+	-	-	hypothetical protein	1	1309662;1309673;2.0;CTGCCG;CTGCCGCTGCCG
opr_607	orf_1434	1316687	1317331	+	R	-	Na+-dependent transporter	0	-
opr_609	orf_1439	1320912	1321319	-	K	HI_0186	DNA-binding transcriptional regulator	1	1321305;1321311;2.3;AGT;AGTAGTA
opr_610	orf_1440	1321440	1322576	+	R	frmA	Zn-dependent alcohol dehydrogenase	1	1322042;1322052;2.2;GTTTG;GTTTGGTTTGG
opr_615	orf_1453	1335315	1335797	-	-	-	hypothetical protein	2	1335359;1335368;3.3;AAG;AAGAAGAAGA**1335551;1335560;2.5;CGAC;CGACCGACCG
opr_620	orf_1468	1350627	1350779	-	S	YwqG	Uncharacterized protein YwqG	0	-
	orf_1471	1354257	1354388	-	-	-	hypothetical protein	0	-
opr_621	orf_1474	1355714	1356070	+	K	NMCC_1250	RNase H-fold protein	0	-
opr_622	orf_1475	1356080	1356736	-	Q	-	2-keto-4-pentenoate hydratase/2-oxohepta-3-ene-1	0	-
opr_625	orf_1483	1367992	1369110	-	P	-	Outer membrane receptor for ferric coprogen and ferric-rhodotorulic acid	3	1368154;1368161;4.0;GC;GCGCGCGC**1368167;1368174;2.0;TCAA;TCAATCAA**1368536;1368544;3.0;GTT;GTTGTTGTT
opr_631	orf_1497	1379829	1380671	+	S	YbjX	Uncharacterized protein VirK/YbjX	1	1379846;1379852;7.0;A;AAAAAAA
opr_633	orf_1500	1382356	1383366	+	C	-	Ferredoxin-NADP reductase	2	1382605;1382619;2.5;ATCAAC;ATCAACATCAACATC**1383281;1383290;2.5;AACA;AACAAACAAA
opr_639	orf_1507	1389748	1390221	-	O	dnrN	Iron-sulfur cluster repair protein YtfE	1	1389925;1389936;2.0;TTCGTG;TTCGTGTTCGTG
opr_650	orf_1525	1400613	1401986	+	L	HI_1056	Adenine specific DNA methylase Mod	7	1400854;1400860;7.0;A;AAAAAAA**1400938;1400948;2.2;TTAAA;TTAAATTAAAT**1401428;1401439;2.0;ATCCGA;ATCCGAATCCGA**1401475;1401483;3.0;CCG;CCGCCGCCG**1401817;1401828;2.0;AACAAA;AACAAAAACAAA**1401912;1401920;3.0;GAT;GATGATGAT**1401953;1401958;6.0;A;AAAAAA
	orf_1526	1401994	1404069	+	S	HI_1055	Uncharacterized protein	11	1402092;1402098;7.0;T;TTTTTTT**1402126;1402139;2.0;TTTTTGA;TTTTTGATTTTTGA**1402227;1402236;3.3;GAT;GATGATGATG**1402236;1402242;2.3;GGC;GGCGGCG**1402252;1402258;2.3;TAT;TATTATT**1402356;1402363;2.0;TTTA;TTTATTTA**1403076;1403092;2.8;CGATAG;CGATAGCGATAGCGATA**1403235;1403247;2.2;CAAAAC;CAAAACCAAAACC**1403397;1403405;3.0;CGG;CGGCGGCGG**1403740;1403746;7.0;A;AAAAAAA**1403749;1403760;2.0;CCCAAT;CCCAAT…
	orf_1527	1404145	1404753	+	S	-	Uncharacterized protein	2	1404259;1404264;6.0;A;AAAAAA**1404469;1404479;2.2;TTTAT;TTTATTTTATT
opr_655	orf_1539	1414327	1414878	-	-	-	hypothetical protein	2	1414672;1414680;3.0;CGC;CGCCGCCGC**1414680;1414687;2.7;CTT;CTTCTTCT
opr_693	orf_1592	1472742	1473377	-	M	-	Cell wall-associated hydrolase	3	1472751;1472757;7.0;A;AAAAAAA**1472956;1472964;3.0;GCC;GCCGCCGCC**1473053;1473061;3.0;TGC;TGCTGCTGC
	orf_1594	1475121	1476662	-	G	-	Predicted arabinose efflux permease	6	1475202;1475208;2.3;GCC;GCCGCCG**1475494;1475500;2.3;ATG;ATGATGA**1475634;1475645;2.0;GCCGAA;GCCGAAGCCGAA**1476288;1476293;6.0;T;TTTTTT**1476517;1476523;7.0;T;TTTTTTT**1476626;1476636;2.2;GCATT;GCATTGCATTG
opr_695	orf_1598	1479923	1480408	-	F	purE	Phosphoribosylcarboxyaminoimidazole (NCAIR) mutase	4	1479955;1479966;2.0;CCTGTT;CCTGTTCCTGTT**1480204;1480215;2.4;GCGCC;GCGCCGCGCCGC**1480226;1480232;2.3;GAT;GATGATG**1480386;1480394;3.0;ATG;ATGATGATG
opr_701	orf_1610	1489815	1490612	+	E	aroD	3-dehydroquinate dehydratase	8	1489832;1489839;4.0;TG;TGTGTGTG**1490134;1490142;3.0;ATT;ATTATTATT**1490186;1490197;2.0;CATCGA;CATCGACATCGA**1490245;1490251;7.0;A;AAAAAAA**1490258;1490264;2.3;CGC;CGCCGCC**1490293;1490301;3.0;CGC;CGCCGCCGC**1490302;1490309;2.7;AAG;AAGAAGAA**1490519;1490529;2.2;GTTCG;GTTCGGTTCGG
opr_702	orf_1612	1492816	1493772	-	L	dinB	Nucleotidyltransferase/DNA polymerase involved in DNA repair	2	1493050;1493062;2.2;GCGTTC;GCGTTCGCGTTCG**1493196;1493202;7.0;T;TTTTTTT
opr_705	orf_1619	1500497	1501636	+	R	YrpB	NAD(P)H-dependent flavin oxidoreductase YrpB	1	1501286;1501292;7.0;A;AAAAAAA
opr_709	orf_1626	1508038	1508928	-	GER	-	Permease of the drug/metabolite transporter (DMT) superfamily	5	1508067;1508075;3.0;CCG;CCGCCGCCG**1508732;1508743;4.0;AGC;AGCAGCAGCAGC**1508782;1508791;2.5;CCGC;CCGCCCGCCC**1508802;1508811;2.5;AAAC;AAACAAACAA**1508814;1508824;3.7;CCG;CCGCCGCCGCC
opr_713	orf_1635	1513088	1513579	-	X	RayT	REP element-mobilizing transposase RayT	0	-
opr_716	orf_1639	1515677	1516408	+	R	-	Tetratricopeptide (TPR) repeat	1	1515729;1515740;4.0;GCG;GCGGCGGCGGCG
opr_717	orf_1641	1518242	1518565	-	C	-	Cytochrome c553	0	-
	orf_1643	1518885	1519430	-	-	-	hypothetical protein	2	1518893;1518903;3.7;GGC;GGCGGCGGCGG**1518974;1518983;2.5;TGCC;TGCCTGCCTG
opr_719	orf_1646	1523436	1524650	-	E	alaA	Aspartate/methionine/tyrosine aminotransferase	3	1523985;1523993;3.0;GTG;GTGGTGGTG**1524220;1524231;2.4;CGTAC;CGTACCGTACCG**1524244;1524253;3.3;GCC;GCCGCCGCCG
	orf_1647	1524739	1524948	-	Q	Dda3937_02002	Phenylpyruvate tautomerase PptA	0	-
opr_721	orf_1649	1526157	1527422	-	E	gluD	Glutamate dehydrogenase/leucine dehydrogenase	5	1526271;1526276;3.0;CG;CGCGCG**1526369;1526377;3.0;CGC;CGCCGCCGC**1526930;1526943;2.0;CATCCAC;CATCCACCATCCAC**1527093;1527102;3.3;GCC;GCCGCCGCCG**1527258;1527267;3.3;GTC;GTCGTCGTCG
opr_724	orf_1659	1534161	1534355	-	-	-	hypothetical protein	2	1534196;1534206;2.8;GGCG;GGCGGGCGGGC**1534210;1534220;2.2;CTGCT;CTGCTCTGCTC
	orf_1660	1534480	1535265	-	S	fimB	fimbrial assembly protein	6	1534488;1534496;3.0;TGA;TGATGATGA**1534565;1534573;3.0;CTG;CTGCTGCTG**1534810;1534820;2.2;CAATG;CAATGCAATGC**1534890;1534898;3.0;CCG;CCGCCGCCG**1535091;1535099;3.0;CCA;CCACCACCA**1535134;1535148;2.5;ATAAGG;ATAAGGATAAGGATA
opr_727	orf_1665	1541055	1541195	+	S	YbdD	Uncharacterized short protein YbdD	0	-
opr_729	orf_1668	1543272	1546037	+	H	NMB1497	Outer membrane cobalamin receptor protein	6	1543655;1543666;2.4;GGGCA;GGGCAGGGCAGG**1543833;1543840;2.7;CTG;CTGCTGCT**1543980;1543990;3.7;GGC;GGCGGCGGCGG**1544964;1544969;6.0;A;AAAAAA**1544981;1544986;3.0;GC;GCGCGC**1545749;1545765;2.4;TTTGATT;TTTGATTTTTGATTTTT
opr_735	orf_1681	1557207	1558625	+	M	-	Phosphoglycerol transferase MdoB or a related enzyme of AlkP superfamily	11	1557266;1557275;3.3;GCT;GCTGCTGCTG**1557308;1557321;2.0;GTTTTGG;GTTTTGGGTTTTGG**1557330;1557341;2.0;ACCGCC;ACCGCCACCGCC**1557337;1557347;2.8;CCGC;CCGCCCGCCCG**1557377;1557383;2.3;GCT;GCTGCTG**1557443;1557450;2.0;TTTG;TTTGTTTG**1557529;1557541;2.2;CCGCCC;CCGCCCCCGCCCC**1557606;1557614;3.0;GCC;GCCGCCGCC**1558245;1558251;7.0;A;AAAAAAA**1558314;1558319;6.0;A;AAAAAA**1558542;1558549;2.7;CCG;CCGCCGCC
opr_756	orf_1721	1594478	1597270	-	P	lbpA	Outer membrane receptor for ferrienterochelin and colicins	10	1594656;1594668;2.2;TTCAGA;TTCAGATTCAGAT**1594698;1594704;2.3;GAC;GACGACG**1595095;1595106;2.0;CGGCAA;CGGCAACGGCAA**1595862;1595873;2.0;TTCAGC;TTCAGCTTCAGC**1595979;1595990;4.0;CGG;CGGCGGCGGCGG**1596220;1596227;2.7;CGC;CGCCGCCG**1596311;1596319;3.0;GCC;GCCGCCGCC**1596352;1596363;2.0;GCGCCT;GCGCCTGCGCCT**1596631;1596641;2.2;GTTCG;GTTCGGTTCGG**1597222;1597229;8.0;C;CCCCCCCC
opr_768	orf_1748	1622130	1623020	-	S	YbjE	Uncharacterized membrane protein YbjE	4	1622166;1622172;2.3;GGC;GGCGGCG**1622179;1622186;2.7;ACC;ACCACCAC**1622817;1622827;2.8;ACAA;ACAAACAAACA**1622901;1622911;3.7;CAG;CAGCAGCAGCA
	orf_1750	1623181	1623897	-	K	-	DNA-binding transcriptional regulator	3	1623268;1623276;3.0;CAG;CAGCAGCAG**1623301;1623314;2.3;ATGCGT;ATGCGTATGCGTAT**1623765;1623773;3.0;GCA;GCAGCAGCA
opr_773	orf_1763	1637013	1637306	-	C	YgiN	Quinol monooxygenase YgiN	1	1637155;1637164;2.0;CGGTT;CGGTTCGGTT
opr_774	orf_1768	1642212	1643111	+	S	-	Uncharacterized protein	5	1642226;1642232;7.0;A;AAAAAAA**1642539;1642544;6.0;A;AAAAAA**1642614;1642624;2.2;TTCTC;TTCTCTTCTCT**1643087;1643092;6.0;A;AAAAAA**1643095;1643100;6.0;A;AAAAAA
	orf_1772	1646549	1647418	+	I	-	3-hydroxyisobutyrate dehydrogenase or related beta-hydroxyacid dehydrogenase	4	1646962;1646968;2.3;CGG;CGGCGGC**1647017;1647023;7.0;A;AAAAAAA**1647235;1647244;2.5;CCCG;CCCGCCCGCC**1647299;1647308;2.5;CAGG;CAGGCAGGCA
opr_775	orf_1774	1648138	1649004	+	V	-	ABC-type multidrug transport system	4	1648332;1648344;2.6;CGGTG;CGGTGCGGTGCGG**1648547;1648558;2.0;TGCTGG;TGCTGGTGCTGG**1648826;1648834;3.0;TGA;TGATGATGA**1648976;1648986;2.2;CGGAA;CGGAACGGAAC
opr_776	orf_1775	1649055	1650155	-	O	sohB	Periplasmic serine protease	10	1649196;1649204;3.0;CAA;CAACAACAA**1649205;1649211;2.3;ATC;ATCATCA**1649238;1649250;2.2;CAACGC;CAACGCCAACGCC**1649433;1649444;2.0;CACATC;CACATCCACATC**1649500;1649509;2.0;ACCGA;ACCGAACCGA**1649563;1649577;4.7;CCG;CCGCCGCTCGCCGCC**1649585;1649596;2.0;CGACGG;CGACGGCGACGG**1649645;1649656;2.0;AACCGT;AACCGTAACCGT**1649867;1649887;3.5;CCTTTT;CCTTTTCCTTTTTCTTTTCCT**1650106;1650113;2.0;ATTG;ATTGATTG
opr_778	orf_1777	1651744	1652046	-	X	-	Transposase and inactivated derivatives	0	-
	orf_1779	1652378	1652713	-	R	HI_1053	Uncharacterized conserved protein YurZ	1	1652501;1652513;4.3;GGC;GGCGGCGGCGGCG
opr_779	orf_1780	1652842	1653747	+	K	-	Transcriptional regulator GlxA family	2	1653515;1653523;4.5;CG;CGCGCGCGC**1653613;1653620;8.0;A;AAAAAAAA
opr_782	orf_1783	1655387	1656481	-	E	-	Spermidine/putrescine-binding periplasmic protein	2	1656423;1656434;2.0;GCCGGT;GCCGGTGCCGGT**1656474;1656480;2.3;AGC;AGCAGCA
opr_798	orf_1809	1680649	1681503	-	S	hag1	Uncharacterized protein/domain	7	1680790;1680801;2.0;TTTAAA;TTTAAATTTAAA**1680862;1680871;2.5;CCCG;CCCGCCCGCC**1680867;1680875;3.0;CCG;CCGCCGCCG**1680973;1680982;3.3;GGC;GGCGGCGGCG**1681080;1681098;1.9;CTTCAAACCC;CTTCAAACCCCTTCAAACC**1681153;1681162;2.0;CGGTA;CGGTACGGTA**1681475;1681485;2.2;AAACA;AAACAAAACAA
opr_810	orf_1832	1701289	1701846	-	C	HI_1542	Nitroreductase	2	1701380;1701391;2.0;TTATCC;TTATCCTTATCC**1701633;1701642;2.0;AATTC;AATTCAATTC
	orf_1833	1701922	1703556	-	M	-	Phosphoethanolamine transferase for periplasmic glucans (OPG)	4	1702767;1702774;4.0;CG;CGCGCGCG**1703206;1703213;4.0;GC;GCGCGCGC**1703378;1703385;8.0;A;AAAAAAAA**1703389;1703395;2.3;CAC;CACCACC
opr_813	orf_1842	1713350	1713976	+	U	YqfA	Predicted membrane channel-forming protein YqfA	2	1713403;1713411;3.0;GGC;GGCGGCGGC**1713563;1713569;7.0;A;AAAAAAA
opr_814	orf_1843	1714040	1715458	-	E	-	Na+/alanine symporter	4	1714334;1714340;2.3;GAT;GATGATG**1714339;1714346;2.7;TGG;TGGTGGTG**1714479;1714490;2.0;GCCGTA;GCCGTAGCCGTA**1714998;1715008;2.2;CGCGC;CGCGCCGCGCC
opr_818	orf_1847	1717751	1718215	-	K	lrp	DNA-binding transcriptional regulator	1	1717753;1717766;2.3;AATCCA;AATCCAAATCCAAA
opr_831	orf_1874	1747990	1748613	+	E	-	Lysophospholipase L1 or related esterase	1	1748006;1748013;2.7;TCC;TCCTCCTC
	orf_1875	1748784	1749143	+	-	-	hypothetical protein	1	1749006;1749014;3.0;GGC;GGCGGCGGC
	orf_1877	1749557	1752025	+	E	gcvP	Glycine cleavage system protein P (pyridoxal-binding)	5	1749615;1749626;4.0;CCG;CCGCCGCCGCCG**1749629;1749643;2.5;GCGATG;GCGATGGCGATGGCG**1750997;1751009;4.3;GTC;GTCGTCGTCGTCG**1751048;1751059;2.0;AAAGCC;AAAGCCAAAGCC**1751284;1751296;4.3;CGG;CGGCGGCGGCGGC
opr_838	orf_1887	1762006	1763004	-	CHR	ddh	Lactate dehydrogenase or related 2-hydroxyacid dehydrogenase	5	1762167;1762174;2.7;CGT;CGTCGTCG**1762778;1762788;2.2;CAACG;CAACGCAACGC**1762800;1762818;1.9;CGCCAATTTG;CGCCAATTTGCGCCAATTT**1762839;1762847;3.0;CGT;CGTCGTCGT**1762879;1762899;2.3;CGCCATTTT;CGCCATTTTCGCCGTTTTCGC
opr_843	orf_1898	1774357	1774872	-	S	-	Uncharacterized protein	3	1774509;1774518;2.0;TGCAG;TGCAGTGCAG**1774678;1774689;2.0;AATCGG;AATCGGAATCGG**1774777;1774785;3.0;TTC;TTCTTCTTC
	orf_1899	1774879	1775304	-	S	-	Uncharacterized membrane protein	1	1775161;1775168;2.7;CAT;CATCATCA
opr_845	orf_1904	1776858	1777613	-	IQ	-	3-oxoacyl-(acyl-carrier-protein) synthase	2	1777118;1777131;2.3;CCAAAA;CCAAAACCAAAACC**1777441;1777448;2.7;CGG;CGGCGGCG
opr_847	orf_1909	1781264	1782328	+	M	-	Glycosyltransferase involved in cell wall bisynthesis	2	1781766;1781775;2.5;TCCC;TCCCTCCCTC**1781797;1781803;7.0;T;TTTTTTT
opr_849	orf_1912	1784224	1784541	-	H	ApbE	Thiamine biosynthesis lipoprotein ApbE	1	1784414;1784420;2.3;GGC;GGCGGCG
opr_852	orf_1918	1789075	1789224	+	P	-	receptor	0	-
opr_856	orf_1925	1797734	1797991	-	-	-	hypothetical protein	2	1797924;1797930;7.0;T;TTTTTTT**1797963;1797972;2.5;TATT;TATTTATTTA
opr_857	orf_1926	1798278	1799846	+	H	AbgT	p-Aminobenzoyl-glutamate transporter AbgT	3	1799221;1799228;2.7;TTG;TTGTTGTT**1799519;1799530;2.0;CTCCGC;CTCCGCCTCCGC**1799648;1799655;2.7;GAT;GATGATGA
opr_858	orf_1928	1803225	1804634	-	S	-	Uncharacterized iron-regulated membrane protein	2	1803902;1803912;2.2;GGTTC;GGTTCGGTTCG**1804082;1804090;3.0;GCA;GCAGCAGCA
opr_860	orf_1935	1810538	1811005	+	R	-	Predicted phosphohydrolase	1	1810694;1810702;3.0;GAA;GAAGAAGAA
opr_861	orf_1938	1812857	1813699	-	M	tonB	Periplasmic protein TonB	4	1812859;1812870;2.4;AATTC;AATTCAATTCAA**1813114;1813122;3.0;TGC;TGCTGCTGC**1813350;1813395;2.6;GGTTTCGGCTTTTCTTCA;GGTTTCGGTTTTTCTTCGGGTTTCGGCTTTTCTTCAGGTTTCGGCT**1813415;1813426;2.0;ATCCGC;ATCCGCATCCGC
opr_866	orf_1943	1817604	1819817	+	TK	-	(p)ppGpp synthase/hydrolase	4	1817798;1817808;2.2;CGGCG;CGGCGCGGCGC**1818411;1818417;7.0;A;AAAAAAA**1818806;1818815;3.3;CGC;CGCCGCCGCC**1819362;1819367;6.0;A;AAAAAA
opr_867	orf_1944	1820304	1820897	+	X	-	Transposase	2	1820356;1820362;7.0;A;AAAAAAA**1820364;1820371;2.7;ACC;ACCACCAC
opr_870	orf_1950	1825462	1826496	+	L	NicK	DNA relaxase NicK	2	1825512;1825524;2.2;TTTCGG;TTTCGGTTTCGGT**1826172;1826178;7.0;A;AAAAAAA
	orf_1951	1826541	1826831	+	-	-	hypothetical protein	2	1826577;1826583;7.0;A;AAAAAAA**1826696;1826702;2.3;CGG;CGGCGGC
	orf_1952	1826836	1827033	+	-	-	hypothetical protein	1	1826886;1826893;4.0;TC;TCTCTCTC
	orf_1953	1827041	1827325	+	-	-	hypothetical protein	1	1827186;1827197;2.0;ATGCAA;ATGCAAATGCAA
	orf_1954	1827332	1827610	+	-	-	hypothetical protein	0	-
opr_881	orf_1971	1841413	1843200	-	U	-	Hemolysin activation/secretion protein	5	1841901;1841908;4.0;GC;GCGCGCGC**1841997;1842006;2.5;CCAA;CCAACCAACC**1842498;1842509;2.4;TTTGG;TTTGGTTTGGTT**1842995;1843001;7.0;T;TTTTTTT**1843054;1843065;2.0;GCGTTG;GCGTTGGCGTTG
opr_886	orf_1984	1867646	1869109	-	U	-	Hemolysin activation/secretion protein	3	1868255;1868263;3.0;GCG;GCGGCGGCG**1868477;1868483;7.0;T;TTTTTTT**1868743;1868752;3.3;CTT;CTTCTTCTTC
opr_890	orf_1990	1872507	1873661	-	J	-	Ribosomal protein L16 Arg81 hydroxylase	0	-
opr_891	orf_1992	1873916	1874056	+	S	-	Uncharacterized membrane protein	2	1873929;1873938;3.3;TCC;TCCTCCTCCT**1873976;1873989;2.3;GGTTTG;GGTTTGGGTTTGGG
opr_896	orf_2002	1882534	1883847	-	C	-	Mg2+/citrate symporter	5	1882980;1882987;2.7;CGC;CGCCGCCG**1883167;1883175;3.0;TTC;TTCTTCTTC**1883361;1883368;2.0;CCCG;CCCGCCCG**1883650;1883663;2.3;AAACAT;AAACATAAACATAA**1883794;1883803;3.3;CAG;CAGCAGCAGC
opr_898	orf_2004	1885148	1886557	+	M	-	D-alanyl-D-alanine carboxypeptidase	8	1885175;1885185;3.7;CTG;CTGCTGCTGCT**1885401;1885411;2.2;ACGGT;ACGGTACGGTA**1885648;1885659;2.0;TATGGT;TATGGTTATGGT**1885924;1885932;3.0;CGG;CGGCGGCGG**1886430;1886438;3.0;TCA;TCATCATCA**1886494;1886500;2.3;CAT;CATCATC**1886503;1886510;2.7;CGG;CGGCGGCG**1886512;1886522;2.8;TGGC;TGGCTGGCTGG
opr_907	orf_2018	1901157	1901624	+	NW	PilP	Tfp pilus assembly protein PilP	2	1901166;1901176;2.2;ACGCG;ACGCGACGCGA**1901435;1901446;2.0;TGTCGG;TGTCGGTGTCGG
opr_912	orf_2026	1908364	1908828	+	K	nrdR	Transcriptional regulator NrdR	3	1908439;1908451;4.3;CGC;CGCCGCCGCCGCC**1908575;1908585;3.7;CCG;CCGCCGCCGCC**1908730;1908736;2.3;GCC;GCCGCCG
opr_913	orf_2033	1916316	1917608	+	E	-	Alanine-alpha-ketoisovalerate (or valine-pyruvate) aminotransferase	1	1916423;1916432;3.3;CGG;CGGCGGCGGC
opr_916	orf_2036	1918941	1919108	-	-	-	Oxidoreductase-like, N-terminal	0	-
opr_925	orf_2058	1941622	1942053	+	S	-	Uncharacterized membrane protein	0	-
opr_930	orf_2066	1947452	1950418	+	NW	-	Tfp pilus assembly protein	8	1947738;1947749;2.0;GCTACA;GCTACAGCTACA**1948001;1948009;3.0;AAT;AATAATAAT**1948787;1948800;4.7;AAC;AACAACGACAACAA**1948951;1948958;4.0;CG;CGCGCGCG**1949388;1949399;2.0;TGTATG;TGTATGTGTATG**1949408;1949416;3.0;AAC;AACAACAAC**1950039;1950046;4.0;GC;GCGCGCGC**1950408;1950416;3.0;TCT;TCTTCTTCT
opr_935	orf_2074	1959919	1960818	-	K	yafC	DNA-binding transcriptional regulator	2	1959953;1959958;6.0;A;AAAAAA**1960608;1960614;3.5;GC;GCGCGCG
opr_936	orf_2075	1961057	1961635	+	R	mdaB	Putative NADPH-quinone reductase (modulator of drug activity B)	3	1961066;1961074;3.0;TTA;TTATTATTA**1961077;1961083;2.3;CGG;CGGCGGC**1961228;1961237;2.5;TGGA;TGGATGGATG
opr_945	orf_2091	1975203	1976180	+	S	-	Lipoprotein GNA1870 C terminal like	5	1975290;1975296;7.0;A;AAAAAAA**1975428;1975434;2.3;GGT;GGTGGTG**1975436;1975443;2.7;CGC;CGCCGCCG**1975684;1975698;2.1;TGGAGAG;TGGAGAGTGGAGAGT**1975992;1976001;3.3;GCC;GCCGCCGCCG
opr_948	orf_2099	1983021	1983650	-	K	-	AraC-type DNA-binding domain and AraC-containing proteins	2	1983027;1983033;2.3;CTT;CTTCTTC**1983457;1983466;3.3;GCC;GCCGCCGCCG
opr_949	orf_2101	1984213	1985178	+	P	-	ABC-type enterochelin transport system	7	1984276;1984282;2.3;GCC;GCCGCCG**1984298;1984310;2.2;CCGCAT;CCGCATCCGCATC**1984696;1984704;4.5;GC;GCGCGCGCG**1984758;1984769;2.0;CAAAGG;CAAAGGCAAAGG**1984967;1984974;2.7;CCG;CCGCCGCC**1985066;1985073;2.0;TGCC;TGCCTGCC**1985115;1985122;2.7;GGC;GGCGGCGG
opr_950	orf_2102	1985735	1986058	+	G	-	Mannose-6-phosphate isomerase	0	-
	orf_2103	1986172	1988349	+	P	-	Outer membrane receptor for ferric coprogen and ferric-rhodotorulic acid	7	1986234;1986245;2.0;TGTTTC;TGTTTCTGTTTC**1986391;1986403;2.2;AGCGTC;AGCGTCAGCGTCA**1986522;1986529;4.0;CG;CGCGCGCG**1986848;1986857;3.3;GGC;GGCGGCGGCG**1987790;1987798;3.0;CCG;CCGCCGCCG**1987869;1987875;2.3;CGC;CGCCGCC**1988141;1988148;2.7;CCG;CCGCCGCC
opr_951	orf_2107	1989927	1990430	-	VT	-	GAF domain-containing protein	2	1990282;1990289;2.0;AACC;AACCAACC**1990307;1990315;3.0;CCG;CCGCCGCCG
opr_954	orf_2112	1992750	1993118	+	S	-	Uncharacterized protein	1	1992894;1992912;3.6;GCAAG;GCAAGGCAAGGACAAGGCA
	orf_2113	1993154	1993426	+	K	YiaG	DNA-binding transcriptional regulator YiaG	1	1993365;1993375;2.2;GCGGC;GCGGCGCGGCG
opr_959	orf_2127	2006804	2007025	+	M	NMA0549	Membrane-anchored protein YidD	1	2006998;2007011;2.3;CGGACA;CGGACACGGACACG
opr_961	orf_2135	2013123	2013374	+	-	-	hypothetical protein	0	-
	orf_2136	2013437	2013790	+	-	-	hypothetical protein	2	2013506;2013512;7.0;T;TTTTTTT**2013530;2013536;7.0;A;AAAAAAA
opr_970	orf_2154	2031684	2032106	-	C	atpC	FoF1-type ATP synthase	0	-
	orf_2162	2038238	2038591	-	C	-	FoF1-type ATP synthase assembly protein I	1	2038272;2038278;7.0;A;AAAAAAA
	orf_2164	2039208	2039363	-	-	-	hypothetical protein	0	-
opr_979	orf_2181	2051730	2052110	+	R	-	Acetyltransferase (isoleucine patch superfamily)	3	2051751;2051760;3.3;CTG;CTGCTGCTGC**2051798;2051811;2.3;CGGCAT;CGGCATCGGCATCG**2051980;2051987;2.7;TGA;TGATGATG
opr_985	orf_2192	2057800	2058717	+	K	-	AraC-type DNA-binding domain and AraC-containing proteins	2	2057852;2057862;3.7;GCG;GCGGCGGCGGC**2058368;2058376;3.0;CGG;CGGCGGCGG
opr_989	orf_2197	2067573	2069090	-	H	-	Outer membrane cobalamin receptor protein	9	2067732;2067742;2.2;GTTGC;GTTGCGTTGCG**2067897;2067910;2.0;CGTTTCG;CGTTTCGCGTTTCG**2067992;2068001;2.5;CCTG;CCTGCCTGCC**2068134;2068149;5.0;CGG;CGGCGGCAGGCGGCGG**2068317;2068323;2.3;GCC;GCCGCCG**2068336;2068343;2.7;AAC;AACAACAA**2068541;2068547;7.0;T;TTTTTTT**2068649;2068659;3.7;CCG;CCGCCGCCGCC**2068916;2068921;3.0;CG;CGCGCG
opr_992	orf_2203	2072800	2074431	+	R	HI_0736	Na+-dependent transporter	9	2073021;2073031;3.7;CGG;CGGCGGCGGCG**2073078;2073089;4.0;GCT;GCTGCTGCTGCT**2073261;2073267;2.3;CGC;CGCCGCC**2073427;2073434;4.0;GC;GCGCGCGC**2073652;2073658;7.0;A;AAAAAAA**2073699;2073705;2.3;CAG;CAGCAGC**2074116;2074126;3.7;CAT;CATCATCATCA**2074344;2074353;3.3;GCT;GCTGCTGCTG**2074397;2074409;2.2;ACGAAC;ACGAACACGAACA
opr_996	orf_2212	2082699	2083370	+	K	-	Fic family protein	3	2082739;2082745;7.0;T;TTTTTTT**2082957;2082963;7.0;A;AAAAAAA**2082965;2082972;2.7;CAA;CAACAACA
opr_997	orf_2215	2084859	2089232	-	MU	hap	Type V secretory pathway	14	2084919;2084927;3.0;GGC;GGCGGCGGC**2085294;2085303;3.3;GCG;GCGGCGGCGG**2085346;2085358;2.2;CCCGCG;CCCGCGCCCGCGC**2085722;2085746;2.1;GCTGCGGTTGGG;GCTGCGGTTGGGGCTGCGGTTGGGG**2085766;2085786;2.3;CGGCGGGCG;CGGCGGGCGCGGCGGGCGCGG**2085767;2085783;4.0;GGCG;GGCGGGCGCGGCGGGCG**2085906;2085916;2.8;GCCT;GCCTGCCTGCC**2086011;2086016;6.0;T;TTTTTT**2086408;2086433;2.9;GAACGGCGC;GAACGGCGCGAACGGCGCGAACGGCG**208…
opr_1001	orf_2224	2095513	2096478	+	P	-	ABC-type enterochelin transport system	3	2095656;2095663;4.0;CG;CGCGCGCG**2095871;2095881;3.7;TCA;TCATCATCATC**2095890;2095896;2.3;CGC;CGCCGCC
	orf_2225	2096642	2097610	+	P	-	ABC-type enterochelin transport system	5	2096678;2096689;4.0;CTG;CTGCTGCTGCTG**2096694;2096700;2.3;TGT;TGTTGTT**2096939;2096948;3.3;CTG;CTGCTGCTGC**2097028;2097043;5.0;CCG;CCGCCGCCTGCCGCCG**2097444;2097453;2.5;GCCT;GCCTGCCTGC
	orf_2226	2097627	2098574	+	P	-	ABC-type enterochelin transport system	3	2097971;2097980;3.3;GCT;GCTGCTGCTG**2098322;2098333;2.0;GGCGAC;GGCGACGGCGAC**2098512;2098521;3.3;GTA;GTAGTAGTAG
	orf_2227	2098618	2099244	+	C	-	Formylmethanofuran dehydrogenase subunit E	3	2098865;2098873;4.5;GC;GCGCGCGCG**2099051;2099062;2.0;CCGTCG;CCGTCGCCGTCG**2099131;2099142;2.0;AGCGCA;AGCGCAAGCGCA
	orf_2228	2099327	2100085	+	P	-	ABC-type enterochelin transport system	4	2099742;2099755;2.3;GCCAAC;GCCAACGCCAACGC**2099893;2099901;3.0;CGT;CGTCGTCGT**2099941;2099948;2.7;CGT;CGTCGTCG**2100032;2100043;2.0;GACGTC;GACGTCGACGTC
opr_1007	orf_2242	2117901	2119310	+	P	ClcA	H+/Cl- antiporter ClcA	13	2118310;2118319;2.5;GTCC;GTCCGTCCGT**2118341;2118359;2.1;GGGCGCGTG;GGGCGCGTGGGGCGCGTGG**2118411;2118429;2.1;GCGGCGGGC;GCGGCGGGCGCGGCGGGCG**2118410;2118417;2.7;GGC;GGCGGCGG**2118413;2118430;4.2;GGCG;GGCGGGCGCGGCGGGCGG**2118652;2118662;2.2;GCGGC;GCGGCGCGGCG**2118659;2118669;2.8;GGCG;GGCGGGCGGGC**2118696;2118704;3.0;GCG;GCGGCGGCG**2118746;2118755;3.3;GCT;GCTGCTGCTG**2118770;2118778;3.0;GCT;GCTGCTGCT…
opr_1012	orf_2256	2137791	2138453	-	J	HI_0042	Pseudouridylate synthase	3	2137798;2137807;2.0;ATTTT;ATTTTATTTT**2138116;2138130;2.1;TTCCACA;TTCCACATTCCACAT**2138204;2138210;7.0;T;TTTTTTT
opr_1013	orf_2265	2144427	2145812	+	GR	-	H+/gluconate symporter or related permease	5	2144476;2144485;3.3;CGG;CGGCGGCGGC**2144636;2144643;2.7;CGG;CGGCGGCG**2145069;2145081;2.2;GTTCCC;GTTCCCGTTCCCG**2145565;2145574;3.3;CCG;CCGCCGCCGC**2145594;2145603;3.3;GCC;GCCGCCGCCG
	orf_2266	2145832	2146350	+	G	-	Gluconate kinase	2	2145862;2145873;2.0;TGCGGC;TGCGGCTGCGGC**2146252;2146263;2.0;GGCGAA;GGCGAAGGCGAA
opr_1015	orf_2269	2148523	2149764	+	E	mtr	Amino acid permease	2	2149039;2149048;2.5;CCGT;CCGTCCGTCC**2149607;2149613;2.3;TGC;TGCTGCT
opr_1024	orf_2293	2169176	2169778	-	F	-	Hypoxanthine-guanine phosphoribosyltransferase	4	2169223;2169229;2.3;CCG;CCGCCGC**2169417;2169425;3.0;ACG;ACGACGACG**2169574;2169580;2.3;CGC;CGCCGCC**2169589;2169599;3.7;GCA;GCAGCAGCAGC
	orf_2294	2169808	2170632	-	L	ligA	ATP-dependent DNA ligase	4	2169820;2169827;2.0;ACGC;ACGCACGC**2169871;2169882;2.0;ACGGTA;ACGGTAACGGTA**2170037;2170046;3.3;TCG;TCGTCGTCGT**2170620;2170626;2.3;TCT;TCTTCTT
opr_1030	orf_2308	2181630	2184386	-	C	ppc	Phosphoenolpyruvate carboxylase	9	2181848;2181859;2.0;TGCGGC;TGCGGCTGCGGC**2182497;2182507;3.7;GCC;GCCGCCGCCGC**2183318;2183327;5.0;GC;GCGCGCGCGC**2183582;2183589;2.7;CGC;CGCCGCCG**2183728;2183734;2.3;TCG;TCGTCGT**2184026;2184034;3.0;CGC;CGCCGCCGC**2184041;2184047;2.3;CTT;CTTCTTC**2184056;2184065;3.3;GGC;GGCGGCGGCG**2184339;2184346;4.0;TC;TCTCTCTC
opr_1033	orf_2316	2190703	2191926	+	F	-	Purine-cytosine permease or related protein	5	2190871;2190876;3.0;TT;TTTTTT**2190877;2190885;3.0;GCG;GCGGCGGCG**2191317;2191330;2.0;CACGCGC;CACGCGCCACGCGC**2191856;2191867;2.0;TTGCCA;TTGCCATTGCCA**2191891;2191897;7.0;A;AAAAAAA
opr_1041	orf_2329	2200757	2201338	-	S	YckC	Uncharacterized membrane protein YckC	1	2201325;2201331;7.0;T;TTTTTTT
opr_1043	orf_2332	2203398	2203724	-	-	-	hypothetical protein	4	2203470;2203479;2.5;CAGG;CAGGCAGGCA**2203494;2203501;2.7;CCG;CCGCCGCC**2203538;2203548;2.2;GGCAG;GGCAGGGCAGG**2203535;2203550;3.8;GCAG;GCAGGCAGGGCAGGCA
opr_1045	orf_2339	2209493	2209861	+	C	-	Cytochrome b561	2	2209689;2209700;2.0;GCGGCC;GCGGCCGCGGCC**2209809;2209815;2.3;GCC;GCCGCCG
opr_1047	orf_2344	2212479	2213111	+	S	OsmY	Osmotically-inducible protein OsmY	4	2212541;2212547;7.0;A;AAAAAAA**2212767;2212775;3.0;CAC;CACCACCAC**2212775;2212781;2.3;CGC;CGCCGCC**2213015;2213037;1.9;GCCCAAAGAAAC;GCCCAAAGAAACGCCCAAAGAAA
opr_1050	orf_2349	2215184	2216650	-	G	mqo	L-2-hydroxyglutarate oxidase LhgO	5	2215454;2215459;6.0;T;TTTTTT**2215921;2215930;3.3;CGC;CGCCGCCGCC**2215937;2215949;2.2;GAGGAA;GAGGAAGAGGAAG**2216418;2216425;4.0;GC;GCGCGCGC**2216612;2216620;3.0;GCC;GCCGCCGCC
opr_1052	orf_2351	2217187	2217777	-	JO	-	Protein N-acetyltransferase	1	2217582;2217595;2.0;CAAACGC;CAAACGCCAAACGC
opr_1054	orf_2358	2222737	2224188	+	S	-	mafB silent cassette	7	2222773;2222781;3.0;GCA;GCAGCAGCA**2223159;2223166;2.0;GGAT;GGATGGAT**2223215;2223221;3.5;AT;ATATATA**2223246;2223257;2.0;AACAAA;AACAAAAACAAA**2223784;2223789;6.0;A;AAAAAA**2224132;2224141;2.5;AAGC;AAGCAAGCAA**2224152;2224161;3.3;ACA;ACAACAACAA
	orf_2359	2224251	2224541	+	-	DMP12	DNA-mimic protein DMP12	0	-
opr_1062	orf_2370	2232560	2232916	+	-	DMP12	DNA-mimic protein DMP12	2	2232627;2232636;2.5;TGAT;TGATTGATTG**2232883;2232888;6.0;A;AAAAAA
opr_1065	orf_2376	2238233	2238400	+	-	-	hypothetical protein	3	2238234;2238244;3.7;TGC;TGCTGCTGCTG**2238260;2238270;2.2;TTTTC;TTTTCTTTTCT**2238331;2238337;2.3;CGC;CGCCGCC
opr_1066	orf_2377	2238476	2239996	-	-	-	Solute-binding protein, transferrin-binding protein-like	3	2239071;2239082;2.0;GGTTTA;GGTTTAGGTTTA**2239096;2239106;2.8;ATTG;ATTGATTGATT**2239940;2239949;3.3;CAT;CATCATCATC
opr_1071	orf_2383	2249513	2250970	+	E	-	Dipeptide/tripeptide permease	8	2249541;2249546;6.0;A;AAAAAA**2249834;2249842;3.0;GCC;GCCGCCGCC**2249892;2249900;3.0;GCG;GCGGCGGCG**2250022;2250028;2.3;GCT;GCTGCTG**2250074;2250083;3.3;GCG;GCGGCGGCGG**2250134;2250145;2.4;CCCCA;CCCCACCCCACC**2250355;2250361;2.3;CAT;CATCATC**2250920;2250931;2.0;CTGCTC;CTGCTCCTGCTC
opr_1075	orf_2389	2254829	2255137	+	S	-	Uncharacterized low-complexity protein	3	2255047;2255054;8.0;A;AAAAAAAA**2255062;2255067;3.0;AC;ACACAC**2255098;2255127;2.0;CGAAGGCAAATGCGG;CGAAGGCAAATGCGGCGAAGGCAAATGCGG
opr_1076	orf_2393	2257446	2257625	+	-	-	hypothetical protein	1	2257528;2257535;4.0;AC;ACACACAC
opr_1081	orf_2398	2259834	2260049	-	S	YsdA	Uncharacterized membrane protein YsdA	1	2260018;2260024;7.0;A;AAAAAAA
	orf_2399	2260218	2260451	-	S	YsdA	Uncharacterized membrane protein YsdA	1	2260432;2260437;6.0;T;TTTTTT
opr_1086	orf_2410	2268201	2269205	-	G	gap	Glyceraldehyde-3-phosphate dehydrogenase/erythrose-4-phosphate dehydrogenase	6	2268408;2268416;3.0;GGC;GGCGGCGGC**2268629;2268638;2.0;TGCGG;TGCGGTGCGG**2268760;2268766;2.3;GCG;GCGGCGG**2268861;2268868;4.0;GC;GCGCGCGC**2268878;2268883;3.0;TG;TGTGTG**2269079;2269087;3.0;GCA;GCAGCAGCA
Note： 1. The data of this table corresponds to N. meningitidis MC58 genome. 2. Operon id; gene id; gene start; gene end; strand; COG id; gene name; function description; number of SSR; SSR attribute list are listed. 3. For SSR attribute, each SSR are separated by '**'. For each SSR; the attributes are listed as follows: start; end; period size; period sequence and complete sequence.

## Sheet: UGNMS_ref_N. meningitidis MC58
Table S3(B) UGNMS in N. meningitidis MC58
##Operon_id	gene_id	start	end	strand	COG_id	gene_name	function	number_of_SSR	SSR_attr(start;end;psize;period;sequence)
opr_22	orf_42	29972	30493	+	-	-	hypothetical protein	3	30095;30100;6.0;A;AAAAAA**30096;30107;2.0;AAAAAG;AAAAAGAAAAAG**30394;30400;2.3;GGC;GGCGGCG
opr_49	orf_103	99361	99519	+	-	-	hypothetical protein	1	99491;99496;3.0;AA;AAAAAA
opr_57	orf_116	110022	110357	+	X	-	Transposase and inactivated derivatives	1	110088;110099;2.0;CGCGGT;CGCGGTCGCGGT
opr_60	orf_119	112406	113080	-	-	-	hypothetical protein	3	112459;112469;3.7;GCA;GCAGCAGCAGC**112665;112674;2.0;AATTG;AATTGAATTG**113035;113040;6.0;T;TTTTTT
opr_83	orf_179	171356	172165	-	P	zupT	Zinc transporter ZupT	2	171923;171931;3.0;CGC;CGCCGCCGC**172030;172040;2.2;CCAAA;CCAAACCAAAC
opr_103	orf_220	211979	212104	-	-	-	hypothetical protein	1	212006;212012;7.0;T;TTTTTTT
opr_117	orf_245	234785	235477	-	R	-	Predicted metal-dependent hydrolase	3	234805;234812;2.0;CCCG;CCCGCCCG**235303;235313;2.2;TCGTT;TCGTTTCGTTT**235427;235438;2.0;TTCGAT;TTCGATTTCGAT
	orf_246	235585	236778	-	P	HI_1728	Mn2+ and Fe2+ transporters of the NRAMP family	4	235614;235625;2.0;TGATGG;TGATGGTGATGG**235723;235735;2.2;AATCAG;AATCAGAATCAGA**236265;236271;2.3;CGG;CGGCGGC**236762;236768;7.0;T;TTTTTTT
	orf_247	236907	237644	-	R	rni3	Lactam utilization protein B (function unknown)	1	237233;237246;2.3;TCAATT;TCAATTTCAATTTC
	orf_248	237666	238541	-	E	HI_1730	Allophanate hydrolase subunit 2	1	237770;237779;3.3;CGG;CGGCGGCGGC
	orf_249	238556	239203	-	E	HI_1731	Allophanate hydrolase subunit 1	2	238748;238761;2.8;CGGCA;CGGCACGGCACGGC**238986;238991;3.0;CA;CACACA
opr_147	orf_319	301617	303728	+	P	-	Outer membrane receptor for monomeric catechols	4	301626;301636;2.2;TCATT;TCATTTCATTT**301791;301797;2.3;GCC;GCCGCCG**302096;302106;3.7;CGG;CGGCGGCGGCG**302635;302641;2.3;ACA;ACAACAA
	orf_320	303843	304538	+	O	-	Protein-disulfide isomerase	2	304165;304175;2.2;ATGAA;ATGAAATGAAA**304276;304289;2.3;CCGATA;CCGATACCGATACC
opr_159	orf_339	321328	323187	+	MU	-	Type V secretory pathway	6	321388;321399;2.0;TTTTCA;TTTTCATTTTCA**321549;321554;3.0;AT;ATATAT**322347;322354;2.7;CGA;CGACGACG**322360;322366;2.3;GCC;GCCGCCG**323052;323061;2.5;GGCA;GGCAGGCAGG**323138;323147;2.5;GGAC;GGACGGACGG
opr_184	orf_398	370096	370869	+	-	FrpC	RTX iron-regulated FrpC	4	370381;370387;7.0;A;AAAAAAA**370549;370555;7.0;A;AAAAAAA**370747;370757;2.2;ACGGT;ACGGTACGGTA**370778;370786;3.0;AGC;AGCAGCAGC
	orf_399	370886	371161	+	Q	-	Ca2+-binding protein	1	371011;371019;3.0;TGC;TGCTGCTGC
opr_226	orf_486	457987	458841	+	GER	HI_0976	Permease of the drug/metabolite transporter (DMT) superfamily	7	458339;458349;2.2;GCGGC;GCGGCGCGGCG**458436;458443;2.0;GGCG;GGCGGGCG**458437;458448;2.0;GCGGGC;GCGGGCGCGGGC**458556;458563;2.0;GCTT;GCTTGCTT**458619;458630;2.0;TTTGGG;TTTGGGTTTGGG**458729;458736;2.7;TGC;TGCTGCTG**458815;458824;2.5;GCCG;GCCGGCCGGC
opr_228	orf_491	464432	465199	+	S	YfcA	Uncharacterized membrane protein YfcA	6	464798;464809;2.0;GCAAAA;GCAAAAGCAAAA**464940;464950;2.2;ATCGT;ATCGTATCGTA**464993;465000;4.0;AT;ATATATAT**465121;465127;7.0;T;TTTTTTT**465139;465154;2.0;TTTTATTG;TTTTATTGTTTTATTG**465150;465161;2.0;TATTGG;TATTGGTATTGG
opr_252	orf_543	520930	526866	+	U	-	Large exoprotein involved in heme utilization or adhesion	11	521023;521033;2.8;CAGG;CAGGCAGGCAG**521139;521150;2.0;TGCCCA;TGCCCATGCCCA**521467;521475;3.0;GGC;GGCGGCGGC**521823;521834;2.0;AGGCGT;AGGCGTAGGCGT**522684;522696;2.2;TACCAA;TACCAATACCAAT**523745;523753;3.0;CCA;CCACCACCA**523870;523876;7.0;A;AAAAAAA**524289;524297;3.0;TAT;TATTATTAT**525311;525320;3.3;CAG;CAGCAGCAGC**525320;525326;2.3;CTA;CTACTAC**525400;525407;2.7;AAT;AATAATAA
	orf_545	527451	529130	+	U	-	Large exoprotein involved in heme utilization or adhesion	4	527888;527899;2.0;CGCAGC;CGCAGCCGCAGC**528511;528517;2.3;CTG;CTGCTGC**528704;528714;2.2;ATTGG;ATTGGATTGGA**528808;528814;7.0;A;AAAAAAA
opr_253	orf_548	530203	532155	+	U	-	Large exoprotein involved in heme utilization or adhesion	11	530224;530233;2.5;GCAC;GCACGCACGC**530335;530345;2.8;TGCG;TGCGTGCGTGC**530459;530471;2.2;CCGGAG;CCGGAGCCGGAGC**530515;530527;2.2;GGAGCC;GGAGCCGGAGCCG**530610;530618;3.0;CAA;CAACAACAA**530961;530972;2.0;TGCGGC;TGCGGCTGCGGC**530968;530976;3.0;GCG;GCGGCGGCG**531154;531162;3.0;GCG;GCGGCGGCG**531273;531278;6.0;A;AAAAAA**531877;531887;2.2;GACAG;GACAGGACAGG**531943;531948;6.0;A;AAAAAA
	orf_551	532798	535248	+	U	-	Large exoprotein involved in heme utilization or adhesion	9	532875;532886;2.0;CAAAAT;CAAAATCAAAAT**533238;533247;3.3;CAC;CACCACCACC**533452;533461;3.3;AGC;AGCAGCAGCA**533737;533747;3.7;GCA;GCAGCAGCAGC**533749;533756;2.7;GTC;GTCGTCGT**533848;533854;2.3;GCA;GCAGCAG**533848;533915;2.3;GCAGCAGGAACGGCAGCCACAACCGGAGTA;GCAGCAGGAACGGCAGCCGGAACTGGAGTAGCAGCAGGAACGGCAGCCACAACCGGAGTAGCAGCAGG**533997;534005;3.0;CAA;CAACAACAA**534061;534076;5.3;GCC;GCCGCCACCGCCGCCG
opr_256	orf_554	536372	537154	+	U	-	Large exoprotein involved in heme utilization or adhesion	1	536929;536940;2.0;TCCAAA;TCCAAATCCAAA
	orf_556	537543	539465	+	U	-	Large exoprotein involved in heme utilization or adhesion	9	537570;537581;2.0;CACCAA;CACCAACACCAA**537775;537783;2.2;GGGT;GGGTGGGTG**538132;538146;2.5;CCGGAG;CCGGAGCCGGAGCCG**538221;538231;3.7;GCC;GCCGCCGCCGC**538283;538291;3.0;CAA;CAACAACAA**538641;538649;3.0;GCG;GCGGCGGCG**538842;538848;2.3;GCT;GCTGCTG**539318;539333;2.7;ATCTAA;ATCTAAATCTAAATCT**539456;539462;7.0;A;AAAAAAA
opr_257	orf_558	540457	540696	+	U	-	Large exoprotein involved in heme utilization or adhesion	3	540519;540524;6.0;A;AAAAAA**540597;540609;2.2;CAAAAT;CAAAATCAAAATC**540670;540679;2.5;GAAG;GAAGGAAGGA
	orf_559	540741	541076	+	U	-	Large exoprotein involved in heme utilization or adhesion	1	540844;540855;2.4;ACGGT;ACGGTACGGTAC
	orf_560	541079	542014	+	-	-	Immunity protein 49	5	541194;541201;8.0;A;AAAAAAAA**541363;541371;3.0;CTT;CTTCTTCTT**541409;541420;2.0;CTGATG;CTGATGCTGATG**541712;541718;7.0;A;AAAAAAA**541720;541725;3.0;CG;CGCGCG
opr_258	orf_561	542968	543147	+	-	-	hypothetical protein	2	543065;543075;2.8;AATT;AATTAATTAAT**543078;543084;7.0;T;TTTTTTT
opr_259	orf_562	543529	543987	+	-	-	hypothetical protein	2	543871;543883;2.2;ATTAAT;ATTAATATTAATA**543890;543896;7.0;A;AAAAAAA
opr_260	orf_566	545743	546213	-	-	-	hypothetical protein	0	-
opr_261	orf_571	548176	548547	+	S	-	Uncharacterized membrane protein	1	548520;548528;3.0;GGC;GGCGGCGGC
opr_292	orf_646	613279	614094	+	-	FrpC	RTX iron-regulated FrpC	4	613292;613300;3.0;CTA;CTACTACTA**613606;613612;7.0;A;AAAAAAA**613774;613780;7.0;A;AAAAAAA**614003;614011;3.0;AGC;AGCAGCAGC
	orf_647	614111	618019	+	Q	frpA	Ca2+-binding protein	9	614236;614244;3.0;TGC;TGCTGCTGC**614842;614850;3.0;TAA;TAATAATAA**615119;615131;2.2;AACGGC;AACGGCAACGGCA**615394;615406;2.2;CGGTAA;CGGTAACGGTAAC**615829;615840;2.0;TAAAGC;TAAAGCTAAAGC**616222;616228;7.0;A;AAAAAAA**616858;616871;2.3;TGGCAA;TGGCAATGGCAATG**617458;617471;2.3;TGGCAA;TGGCAATGGCAATG**617953;617959;2.3;AGG;AGGAGGA
opr_300	orf_671	639549	639725	+	-	-	hypothetical protein	0	-
opr_323	orf_726	687254	687391	-	-	-	hypothetical protein	0	-
opr_338	orf_770	722447	722563	-	-	-	hypothetical protein	1	722489;722495;7.0;A;AAAAAAA
opr_349	orf_791	746083	746460	-	S	MutK	Uncharacterized membrane protein MutK	3	746365;746372;2.7;CAG;CAGCAGCA**746380;746386;2.3;GTC;GTCGTCG**746429;746442;2.3;ATGCCG;ATGCCGATGCCGAT
opr_350	orf_792	747005	747325	+	CP	-	NhaP-type Na+/H+ and K+/H+ antiporter with C-terminal TrkAC and CorC domains	0	-
opr_351	orf_794	747831	748232	-	C	-	Cytochrome c	5	747835;747842;8.0;T;TTTTTTTT**747838;747851;2.0;TTTTTGC;TTTTTGCTTTTTGC**747880;747888;3.0;CCG;CCGCCGCCG**748022;748030;3.0;GCA;GCAGCAGCA**748177;748185;3.0;GCG;GCGGCGGCG
opr_352	orf_802	754256	754480	+	X	-	Transposase	3	754280;754290;2.8;TTTC;TTTCTTTCTTT**754299;754305;7.0;T;TTTTTTT**754334;754345;2.0;TTAAAT;TTAAATTTAAAT
opr_387	orf_900	838750	838953	-	-	-	hypothetical protein	0	-
opr_462	orf_1072	991720	992187	+	R	mdaB	Putative NADPH-quinone reductase (modulator of drug activity B)	1	991780;991789;2.5;TGGA;TGGATGGATG
opr_465	orf_1084	1001509	1002057	+	X	-	Mu-like prophage protein gp16	2	1001554;1001559;6.0;T;TTTTTT**1002002;1002023;3.0;CGGAAAA;CGGAAAACAGGAAAACGGAAAA
	orf_1085	1002065	1002466	+	K	-	Transcriptional regulator	0	-
opr_466	orf_1086	1002774	1003319	+	M	-	N-acetylmuramoyl-L-alanine amidase	2	1003011;1003019;3.0;GCG;GCGGCGGCG**1003181;1003190;2.5;GCAG;GCAGGCAGGC
	orf_1088	1003522	1003686	+	-	-	hypothetical protein	0	-
opr_467	orf_1092	1005589	1007364	-	UW	nhhA	Autotransporter adhesin	5	1005727;1005736;3.3;GCC;GCCGCCGCCG**1006382;1006390;3.0;GTT;GTTGTTGTT**1006447;1006459;2.2;GCCTTC;GCCTTCGCCTTCG**1007106;1007119;2.3;CTTTTT;CTTTTTCTTTTTCT**1007189;1007198;3.3;TCT;TCTTCTTCTT
opr_473	orf_1102	1014523	1014777	+	-	-	hypothetical protein	0	-
opr_511	orf_1195	1099110	1099661	-	R	-	ABC-type uncharacterized transport system	2	1099184;1099194;3.7;TGA;TGATGATGATG**1099571;1099578;4.0;GC;GCGCGCGC
opr_515	orf_1203	1106105	1106269	+	-	-	hypothetical protein	0	-
	orf_1205	1106549	1106899	+	-	-	hypothetical protein	2	1106669;1106681;2.2;GAACTG;GAACTGGAACTGG**1106696;1106701;3.0;AA;AAAAAA
opr_516	orf_1207	1107146	1107316	-	S	NMA1193	Uncharacterized conserved protein YegP	0	-
opr_517	orf_1208	1107377	1107547	+	-	-	hypothetical protein	0	-
opr_526	orf_1241	1132880	1133485	+	-	HI_1402	hypothetical protein	3	1133096;1133110;5.0;GCC;GCCGCCGCCGCCGCC**1133265;1133276;2.0;CCCCGA;CCCCGACCCCGA**1133290;1133298;3.0;CGC;CGCCGCCGC
opr_538	orf_1276	1162287	1163210	-	EH	cysD	3'-phosphoadenosine 5'-phosphosulfate sulfotransferase (PAPS reductase)/FAD synthetase or related enzyme	5	1162302;1162307;6.0;T;TTTTTT**1162784;1162798;2.1;CGCGCCG;CGCGCCGCGCGCCGC**1163064;1163075;2.0;GGCGAG;GGCGAGGGCGAG**1163157;1163168;2.0;GGATTC;GGATTCGGATTC**1163190;1163202;2.6;GTTCG;GTTCGGTTCGGTT
	orf_1277	1163248	1163988	-	EH	cysH1	3'-phosphoadenosine 5'-phosphosulfate sulfotransferase (PAPS reductase)/FAD synthetase or related enzyme	1	1163287;1163297;3.7;CCA;CCACCACCACC
	orf_1278	1163999	1165450	-	H	cysG	Siroheme synthase (precorrin-2 oxidase/ferrochelatase domain)	6	1164448;1164456;3.0;CGG;CGGCGGCGG**1164514;1164522;3.0;CGC;CGCCGCCGC**1164920;1164928;3.0;GCG;GCGGCGGCG**1165009;1165015;2.3;GCA;GCAGCAG**1165355;1165363;3.0;CAG;CAGCAGCAG**1165387;1165396;3.3;CGC;CGCCGCCGCC
opr_551	orf_1311	1194323	1195246	-	EH	cysD	3'-phosphoadenosine 5'-phosphosulfate sulfotransferase (PAPS reductase)/FAD synthetase or related enzyme	5	1194338;1194343;6.0;T;TTTTTT**1194820;1194834;2.1;CGCGCCG;CGCGCCGCGCGCCGC**1195100;1195111;2.0;GGCGAG;GGCGAGGGCGAG**1195193;1195204;2.0;GGATTC;GGATTCGGATTC**1195226;1195238;2.6;GTTCG;GTTCGGTTCGGTT
	orf_1312	1195284	1196024	-	EH	cysH1	3'-phosphoadenosine 5'-phosphosulfate sulfotransferase (PAPS reductase)/FAD synthetase or related enzyme	1	1195323;1195333;3.7;CCA;CCACCACCACC
	orf_1313	1196035	1197486	-	H	cysG	Siroheme synthase (precorrin-2 oxidase/ferrochelatase domain)	6	1196484;1196492;3.0;CGG;CGGCGGCGG**1196550;1196558;3.0;CGC;CGCCGCCGC**1196956;1196964;3.0;GCG;GCGGCGGCG**1197045;1197051;2.3;GCA;GCAGCAG**1197391;1197399;3.0;CAG;CAGCAGCAG**1197423;1197432;3.3;CGC;CGCCGCCGCC
opr_588	orf_1381	1262648	1263304	+	G	-	Glycosyltransferase	1	1263290;1263296;7.0;T;TTTTTTT
opr_595	orf_1403	1281927	1282124	+	G	-	Major Facilitator	4	1281992;1282002;3.7;CGG;CGGCGGCGGCG**1282004;1282010;2.3;GCT;GCTGCTG**1282069;1282078;3.3;CGG;CGGCGGCGGC**1282094;1282107;2.3;CCTGAA;CCTGAACCTGAACC
opr_596	orf_1410	1289837	1289971	-	-	-	hypothetical protein	1	1289955;1289960;6.0;A;AAAAAA
opr_598	orf_1413	1293266	1293517	-	M	-	Lytic murein transglycosylase B	1	1293434;1293440;2.3;CGG;CGGCGGC
opr_645	orf_1516	1395194	1395349	+	-	-	hypothetical protein	3	1395254;1395259;3.0;AA;AAAAAA**1395305;1395313;2.2;CAAG;CAAGCAAGC**1395334;1395339;3.0;TG;TGTGTG
opr_652	orf_1531	1408066	1408248	+	-	-	hypothetical protein	2	1408131;1408142;2.0;AGATTT;AGATTTAGATTT**1408211;1408219;3.0;ACG;ACGACGACG
opr_672	orf_1563	1441254	1442063	+	-	FrpC	RTX iron-regulated FrpC	5	1441267;1441275;3.0;CTA;CTACTACTA**1441581;1441587;7.0;A;AAAAAAA**1441749;1441755;7.0;A;AAAAAAA**1441941;1441951;2.2;ACGGT;ACGGTACGGTA**1441972;1441980;3.0;AGC;AGCAGCAGC
opr_673	orf_1564	1442271	1442588	-	X	-	Transposase and inactivated derivatives	1	1442511;1442522;2.0;ACCGCG;ACCGCGACCGCG
opr_674	orf_1565	1442836	1443609	+	-	FrpC	RTX iron-regulated FrpC	3	1443121;1443127;7.0;A;AAAAAAA**1443289;1443295;7.0;A;AAAAAAA**1443518;1443526;3.0;AGC;AGCAGCAGC
	orf_1566	1443626	1449115	+	Q	frpC	Ca2+-binding protein	14	1443751;1443759;3.0;TGC;TGCTGCTGC**1444357;1444365;3.0;TAA;TAATAATAA**1444569;1444574;6.0;A;AAAAAA**1444570;1444583;2.0;AAAAATG;AAAAATGAAAAATG**1444876;1444887;2.0;CCTAGA;CCTAGACCTAGA**1445015;1445027;2.2;AACGGC;AACGGCAACGGCA**1445290;1445302;2.2;CGGTAA;CGGTAACGGTAAC**1445725;1445736;2.0;TAAAGC;TAAAGCTAAAGC**1446118;1446124;7.0;A;AAAAAAA**1446754;1446767;2.3;TGGCAA;TGGCAATGGCAATG**1447354;1447367…
opr_731	orf_1675	1550828	1550950	-	-	-	hypothetical protein	0	-
opr_755	orf_1720	1591951	1592958	+	X	-	Transposase and inactivated derivatives	1	1592366;1592374;3.0;CCG;CCGCCGCCG
opr_787	orf_1789	1661113	1662120	+	X	-	Transposase and inactivated derivatives	1	1661195;1661204;2.5;TGAT;TGATTGATTG
opr_820	orf_1852	1722307	1722435	-	S	-	Periplasmic protein	0	-
opr_821	orf_1854	1723492	1724085	+	-	-	hypothetical protein	1	1723727;1723733;7.0;A;AAAAAAA
	orf_1855	1724197	1725117	+	X	-	Phage head maturation protease	3	1724239;1724247;3.0;GAC;GACGACGAC**1724308;1724315;2.7;GCG;GCGGCGGC**1724917;1724931;2.5;GCCTTC;GCCTTCGCCTTCGCC
opr_846	orf_1907	1779165	1780301	+	IQ	-	3-oxoacyl-(acyl-carrier-protein) synthase	4	1779351;1779360;2.5;GACG;GACGGACGGA**1779487;1779494;2.7;CCG;CCGCCGCC**1779871;1779882;2.4;CGCCC;CGCCCCGCCCCG**1780208;1780220;2.2;CGGCAG;CGGCAGCGGCAGC
opr_859	orf_1929	1804836	1804961	-	C	-	Cytochrome c5	0	-
opr_863	orf_1940	1815044	1815781	-	P	-	Co/Zn/Cd efflux system component	1	1815410;1815415;6.0;T;TTTTTT
opr_868	orf_1945	1821061	1822440	-	M	TolC	Outer membrane protein TolC	2	1821875;1821886;2.0;GCCTGC;GCCTGCGCCTGC**1822192;1822200;3.0;TTG;TTGTTGTTG
	orf_1946	1822533	1823960	-	MV	-	Multidrug efflux pump subunit AcrA (membrane-fusion protein)	5	1823420;1823431;2.0;CATCGG;CATCGGCATCGG**1823683;1823692;2.5;CGCC;CGCCCGCCCG**1823710;1823718;3.0;GCC;GCCGCCGCC**1823784;1823790;2.3;CGC;CGCCGCC**1823928;1823937;2.5;AGAA;AGAAAGAAAG
opr_869	orf_1947	1824196	1824549	+	-	-	hypothetical protein	4	1824356;1824365;3.3;CCG;CCGCCGCCGC**1824377;1824386;2.5;TGTT;TGTTTGTTTG**1824416;1824423;2.7;AAG;AAGAAGAA**1824460;1824472;2.2;GAAGCC;GAAGCCGAAGCCG
	orf_1948	1824600	1824767	+	-	-	hypothetical protein	0	-
	orf_1949	1824838	1825083	+	-	-	hypothetical protein	3	1824984;1824991;2.0;ACTT;ACTTACTT**1825033;1825067;2.2;CCTTATATATTGCGTC;CCTTATATATTGCGTCCCTTATATATTGCGTCCCT**1825036;1825042;3.5;TA;TATATAT
opr_884	orf_1977	1855574	1857412	-	U	-	Large exoprotein involved in heme utilization or adhesion	9	1855669;1855675;7.0;T;TTTTTTT**1855840;1855846;7.0;T;TTTTTTT**1856639;1856647;3.0;CGC;CGCCGCCGC**1856643;1856654;2.0;GCCGCA;GCCGCAGCCGCA**1856997;1857005;3.0;TTG;TTGTTGTTG**1857088;1857100;2.2;CGGCTC;CGGCTCCGGCTCC**1857144;1857156;2.2;GCTCCG;GCTCCGGCTCCGG**1857270;1857280;2.8;GCAC;GCACGCACGCA**1857382;1857391;2.5;GCGT;GCGTGCGTGC
opr_885	orf_1980	1858485	1860746	-	U	-	Large exoprotein involved in heme utilization or adhesion	5	1858801;1858807;7.0;T;TTTTTTT**1858901;1858911;2.2;TCCAA;TCCAATCCAAT**1859114;1859120;2.3;CTC;CTCCTCC**1859716;1859727;2.0;GCTGCG;GCTGCGGCTGCG**1860297;1860306;3.3;GGT;GGTGGTGGTG
opr_886	orf_1983	1861550	1867537	-	U	-	Large exoprotein involved in heme utilization or adhesion	12	1862003;1862016;2.0;ATTGTTT;ATTGTTTATTGTTT**1863067;1863074;2.7;TGA;TGATGATG**1863147;1863156;3.3;GCT;GCTGCTGCTG**1864170;1864178;3.0;ATA;ATAATAATA**1864183;1864189;2.3;CAT;CATCATC**1864591;1864597;7.0;T;TTTTTTT**1864714;1864722;3.0;TGG;TGGTGGTGG**1865771;1865783;2.2;ATTGGT;ATTGGTATTGGTA**1866633;1866644;2.0;ACGCCT;ACGCCTACGCCT**1866992;1867000;3.0;GCC;GCCGCCGCC**1867317;1867328;2.0;TGGGCA;TGGGCA…
opr_887	orf_1985	1869787	1869957	-	-	-	hypothetical protein	0	-
opr_899	orf_2005	1886775	1887110	-	X	-	Transposase and inactivated derivatives	1	1887033;1887044;2.0;ACCGCG;ACCGCGACCGCG
opr_918	orf_2040	1923475	1923624	+	V	-	CRISPR/Cas system Type II associated protein	0	-
opr_932	orf_2069	1954738	1955127	+	L	-	Very-short-patch-repair endonuclease	1	1954885;1954891;2.3;CAG;CAGCAGC
opr_940	orf_2084	1968913	1969053	-	-	-	hypothetical protein	0	-
opr_997	orf_2216	2089366	2089665	-	S	-	Uncharacterized membrane protein	2	2089444;2089451;2.7;GGC;GGCGGCGG**2089654;2089663;3.3;CGG;CGGCGGCGGC
opr_1015	orf_2274	2152580	2153239	+	R	-	Predicted metal-dependent hydrolase	3	2152677;2152688;2.0;TCTCCG;TCTCCGTCTCCG**2152748;2152757;3.3;CCG;CCGCCGCCGC**2152986;2152995;3.3;CCT;CCTCCTCCTC
opr_1016	orf_2277	2155457	2155696	+	T	-	Antitoxin component of the MazEF toxin-antitoxin module	1	2155648;2155655;8.0;T;TTTTTTTT
	orf_2278	2155825	2156007	+	V	-	mRNA-degrading endonuclease	0	-
opr_1045	orf_2338	2209228	2209428	+	C	-	Cytochrome B561	0	-
opr_1073	orf_2385	2251592	2251705	+	-	-	hypothetical protein	0	-
opr_1077	orf_2394	2257644	2257760	-	-	-	hypothetical protein	0	-
opr_1086	orf_2409	2268044	2268157	-	S	YsdA	Uncharacterized membrane protein YsdA	0	-
Note： 1. The data of this table corresponds to N. meningitidis MC58 genome. 2. Operon id; gene id; gene start; gene end; strand; COG id; gene name; function description; number of SSR; SSR attribute list are listed. 3. For SSR attribute, each SSR are separated by '**'. For each SSR; the attributes are listed as follows: start; end; period size; period sequence and complete sequence.
